# Supplementary material for: Quantifying quality in DNA self-assembly
Source: PubMed Central journal article supplement (PMC3997801; doi:10.1038/ncomms4691), 2014-04-22
Supplement: ncomms4691-s1.pdf [file ncomms4691-s1.pdf]

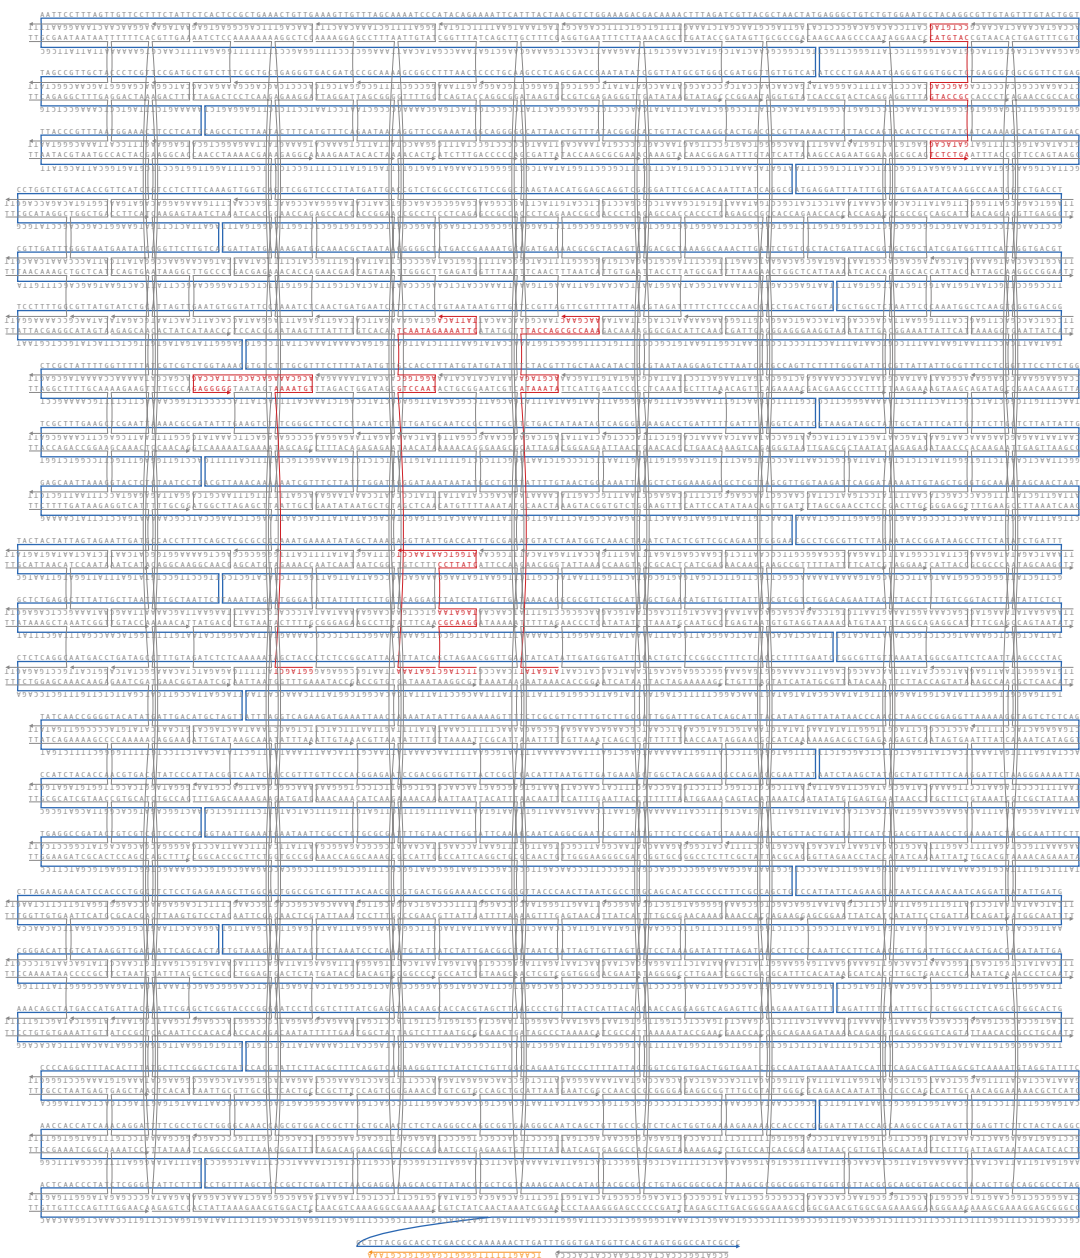

**Supplementary Figure 2:** Scaffold / staple layout of the 42-helix bundle object (pseudo-defect-variant with 5 defects). Generated with caDNAo v0.2. Object-label is colored orange. Omitted staples are depicted in red.

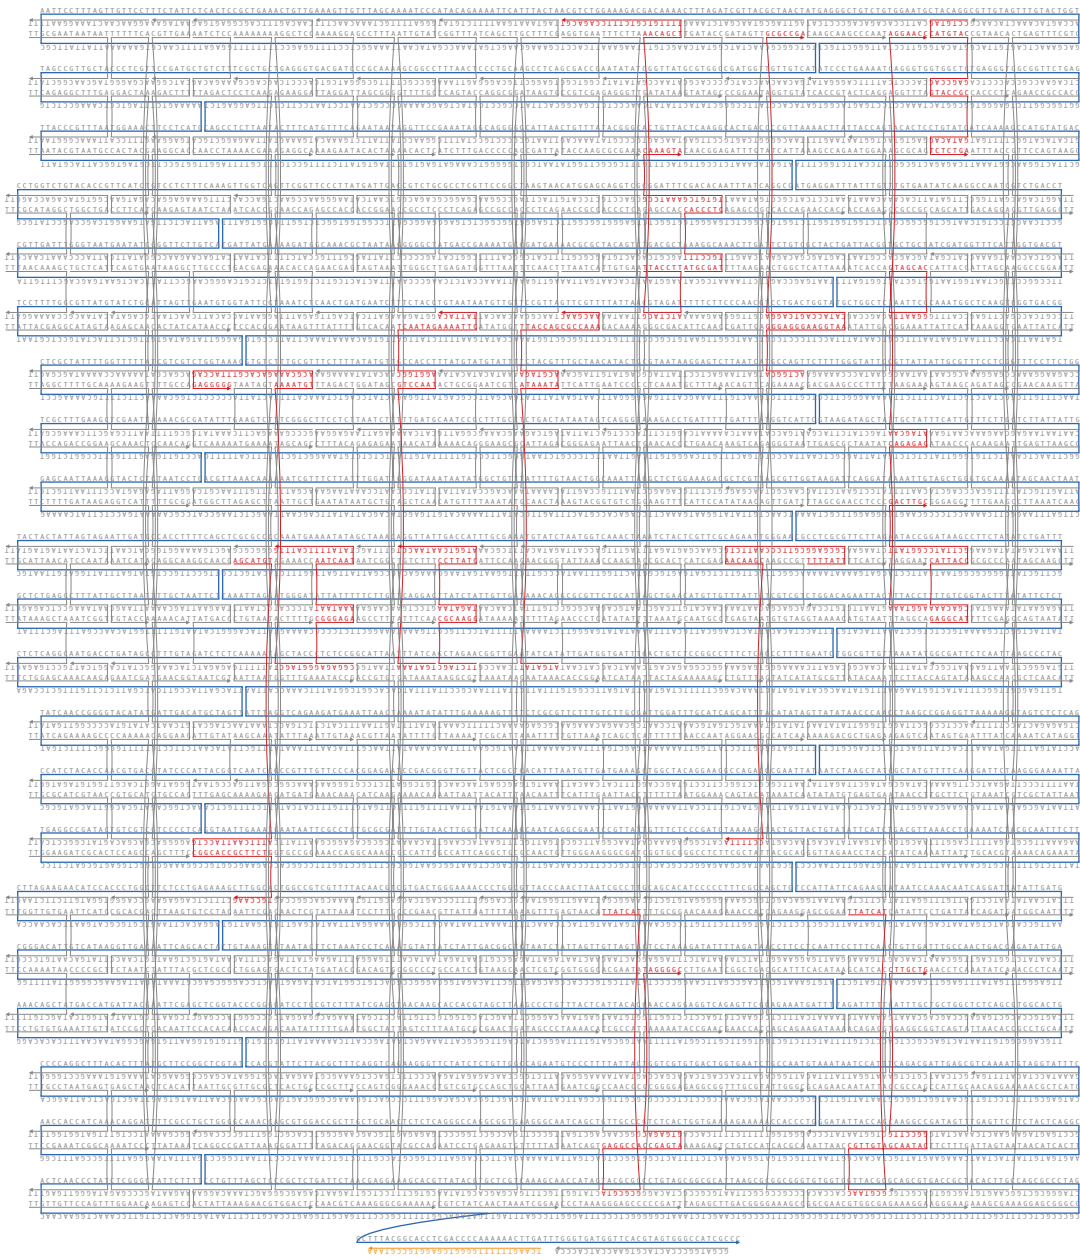

**Supplementary Figure 3:** Scaffold / staple layout of the 42-helix bundle object (pseudo-defect-variant with 15 defects). Generated with caDNAo v0.2. Object-label is colored orange. Omitted staples are depicted in red.

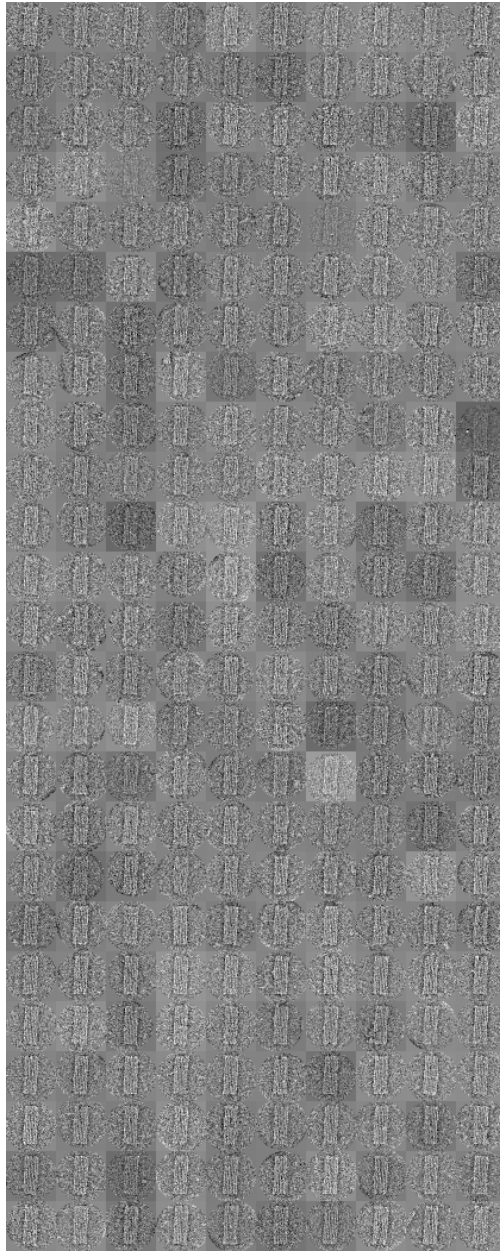

**Supplementary Figure 4:** Negative-stain TEM-images of the 42-helix-bundle object with 0 pseudo-defects. Image size = 85 x 85 nm. View 1 (see fig. 1a)



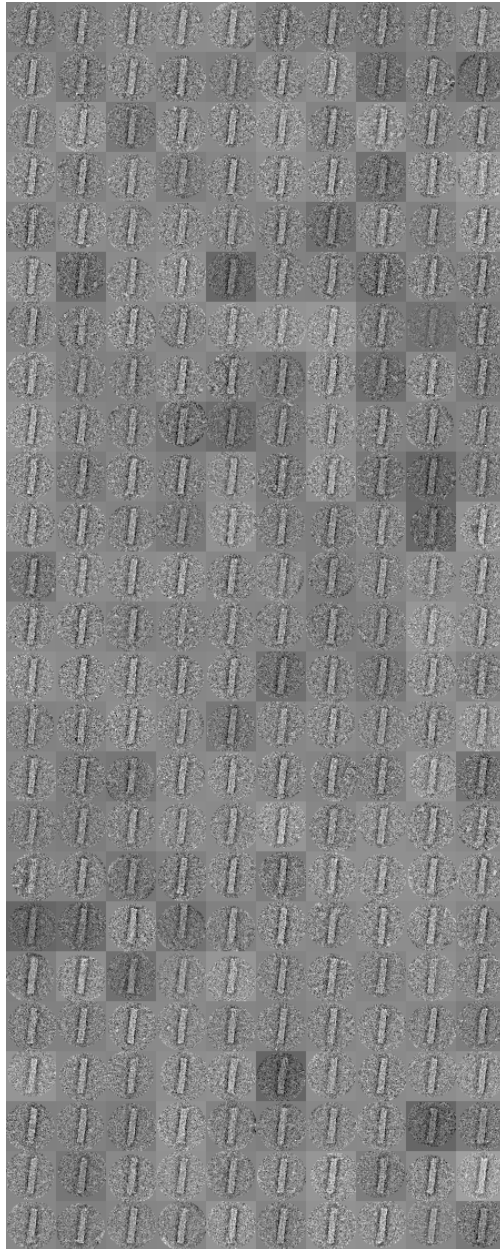

**Supplementary Figure 5:** Negative-stain TEM-images of the 42-helix-bundle object with 0 pseudo-defects. Image size = 85 x 85 nm. View 2 (see Fig. 1a)

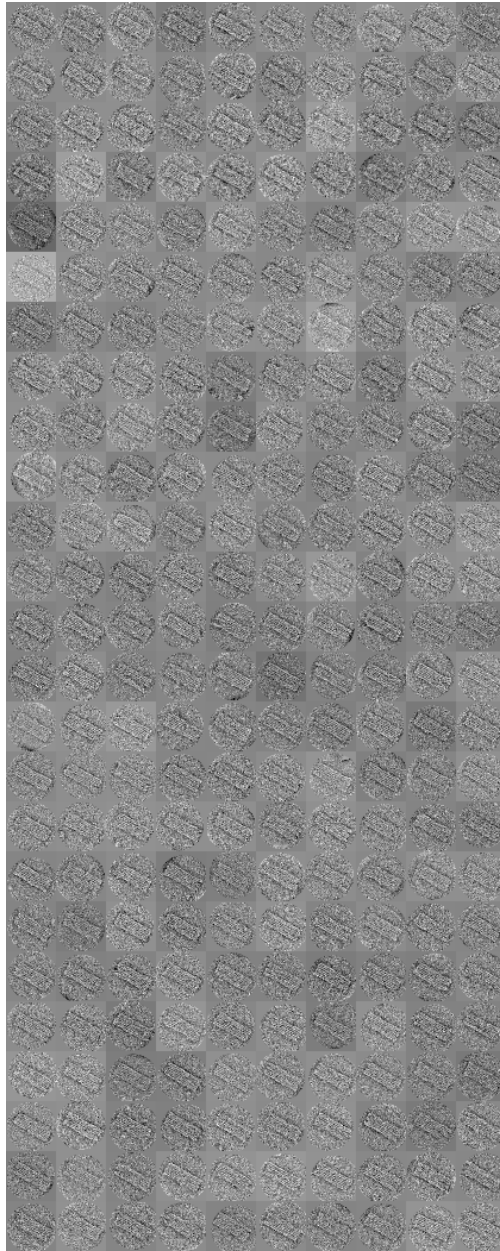

**Supplementary Figure 6:** Negative-stain TEM-images of the 42-helix-bundle object with 5 pseudo-defects. Image size = 85 x 85 nm. View 1 (see fig. 1a).

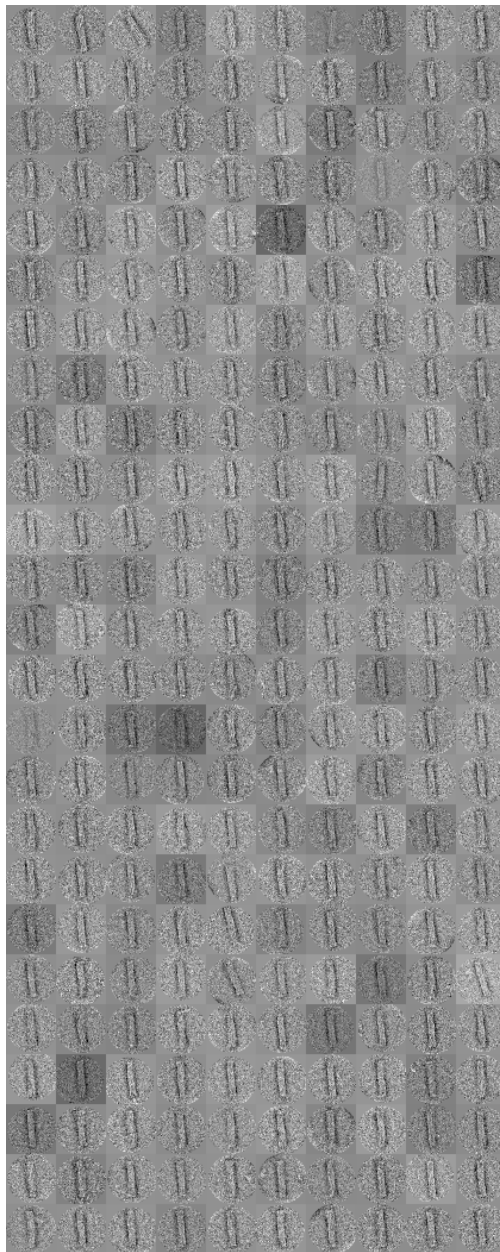

**Supplementary Figure 7:** Negative-stain TEM-images of the 42-helix-bundle object with 5 pseudo-defects. Image size = 85 x 85 nm. View 2 (see fig. 1a)

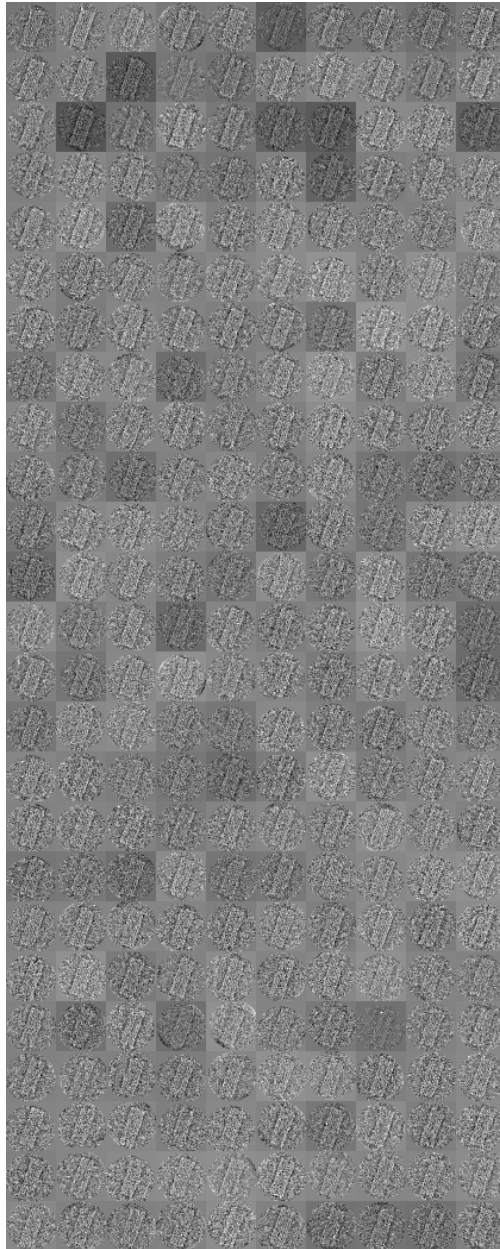

**Supplementary Figure 8:** Negative-stain TEM-images of the 42-helix-bundle object with 15 pseudo-defects. Image size = 85 x 85 nm. View 1 (see fig. 1a).

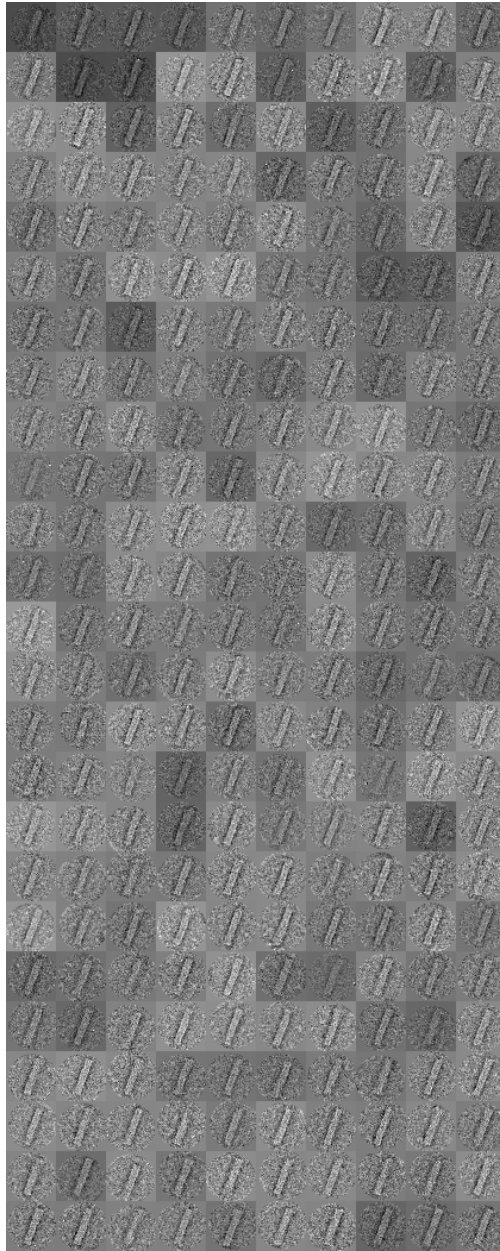

**Supplementary Figure 9:** Negative-stain TEM-images of the 42-helix-bundle object with 15 pseudo-defects. Image size = 85 x 85 nm. View 2 (see fig. 1a).

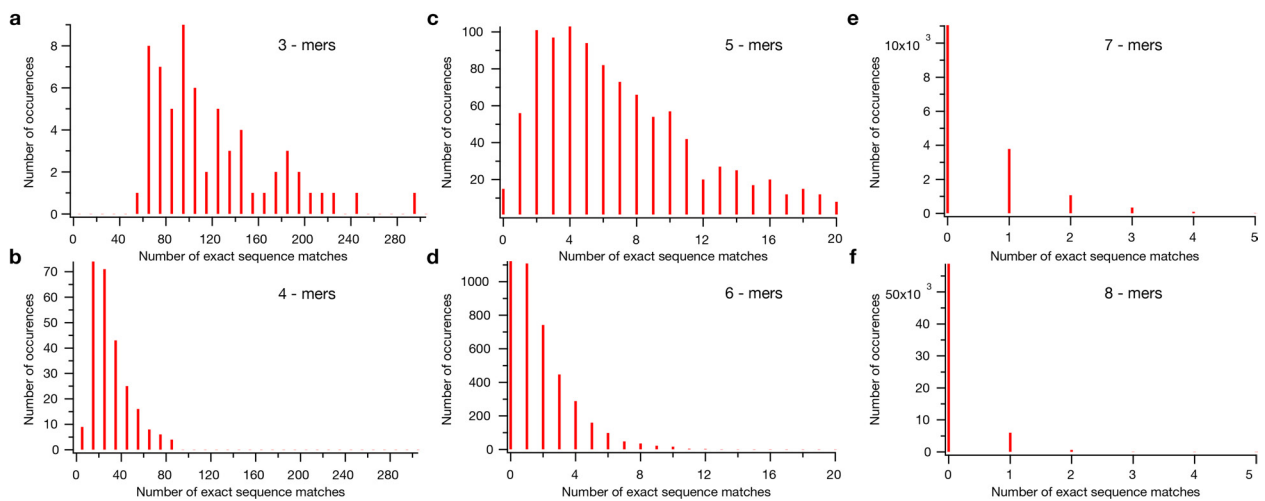

**Supplementary Figure 10:** Analysis of the target sequence space in the scaffold DNA. Scaffold DNA was searched for all  $4^N$  N-base long sequence strings and the number of exact matches was counted. Histogram give the frequency by which a certain number of exact matches was observed. Please see discussion in the supplementary text.

**a** de-Brujin order 2

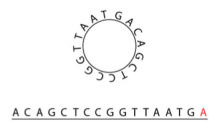

**b** de-Brujin order 3

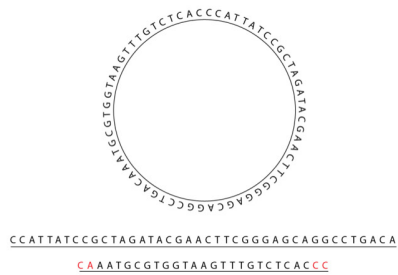

**c** de-Brujin order 4

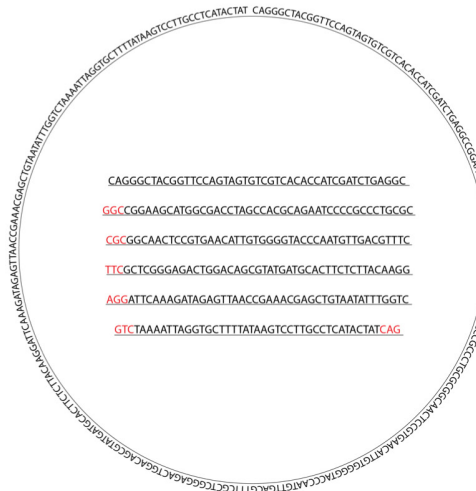

**Supplementary Figure 11:** Circular de-Brujin sequence strings of order 2, 3, and 4 and the linearized sequence strings that were chemically synthesized. Bases marked in red were added to restore sequence strings that are destroyed when linearizing the circular de-Brujin graph.



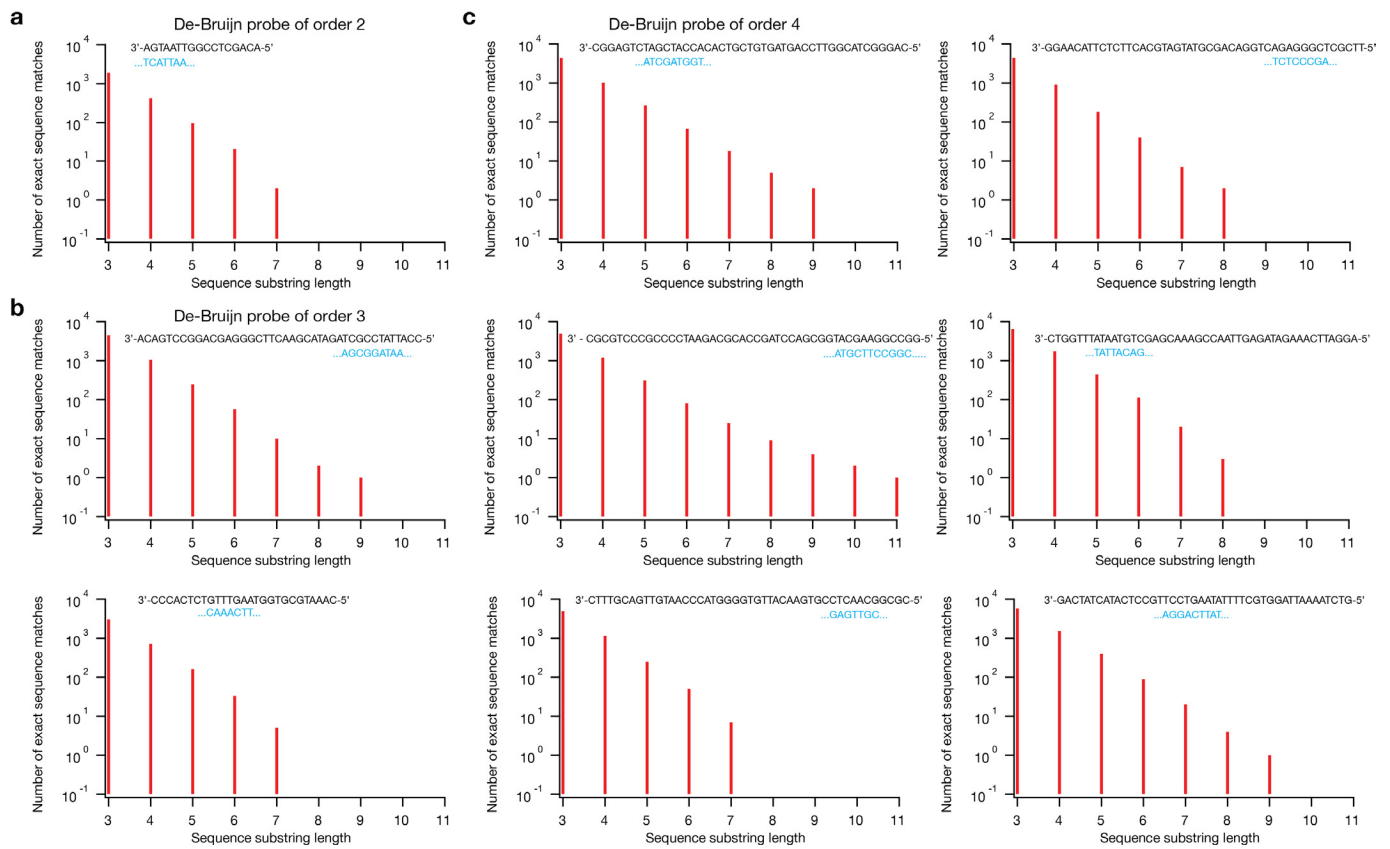

**Supplementary Figure 12:** Statistics of exact complementary sequence matches between target DNA and de-Brujin probe sequences from Fig. S11. One of the longest match string is indicated in each panel in blue.

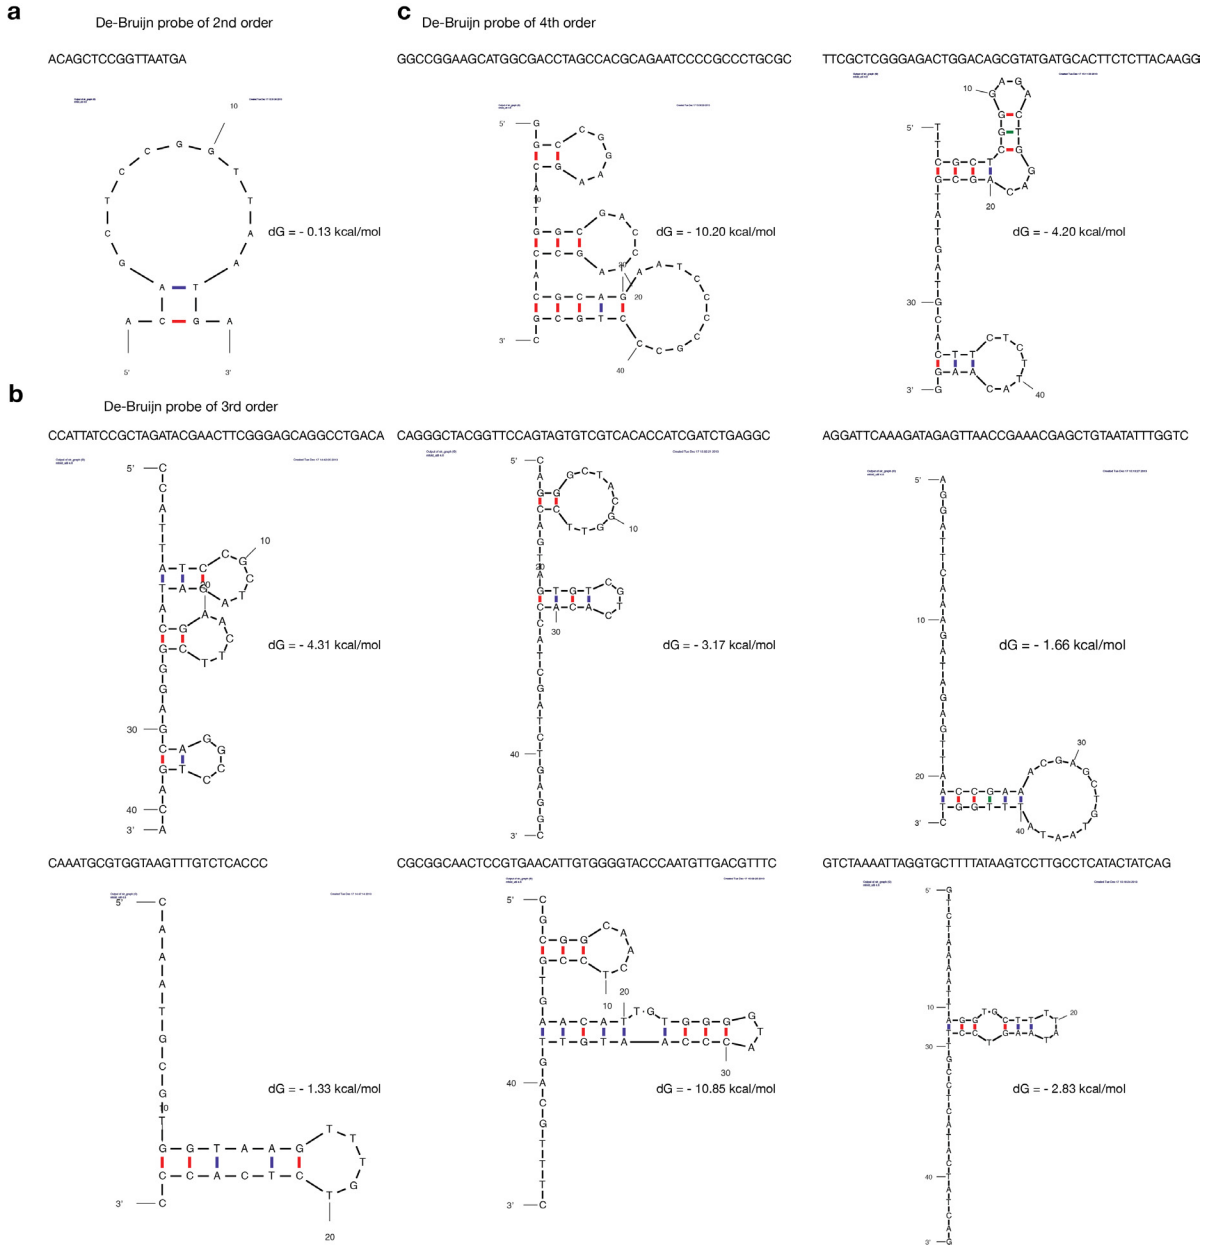

**Supplementary Figure 13:** Lowest-energy secondary structures in de-Brujin probes of order two (a), three (b), and four (c) according to an analysis using mfold [1].

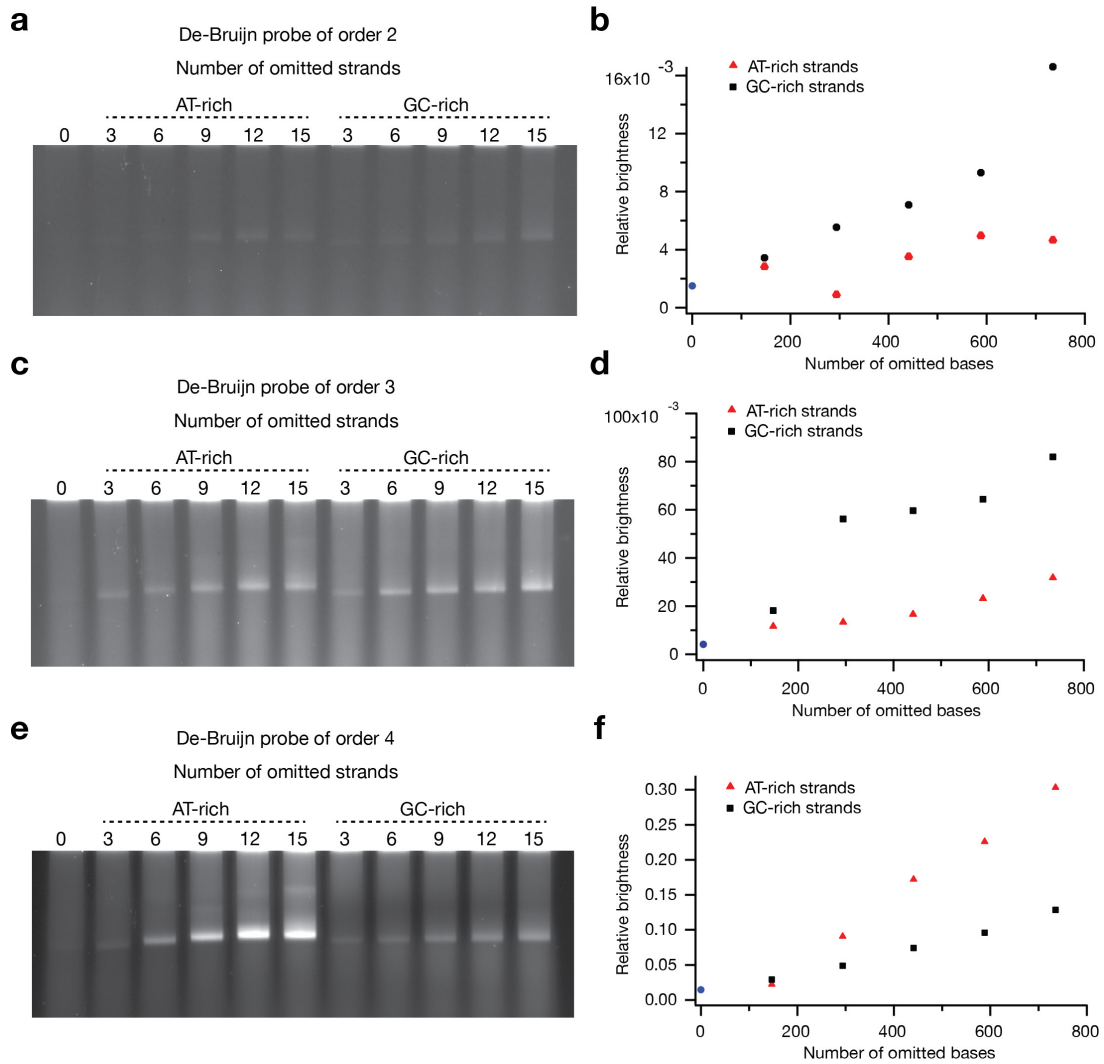

**Supplementary Figure 14:** Testing de-Brujin probes of order 2 to 4 for bias against labeling AT-rich versus GC-rich defects (see Supplementary Tables 13, 14 for lists of the corresponding oligonucleotides with highest AT and GC-content).

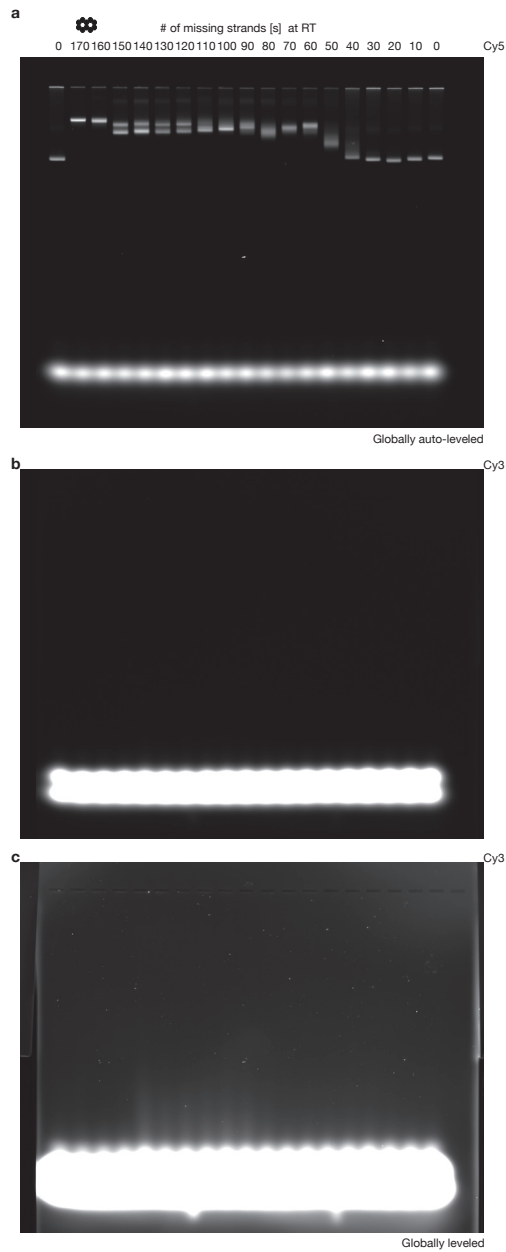

**Supplementary Figure 15:** Agarose-gel images for ten-helix bundle object variants. Gel-box was immersed in water-bath without ice. Cy5 (object label) and Cy3 (defect label) channel (two different brightness-adjustments) are shown. RT = room temperature.

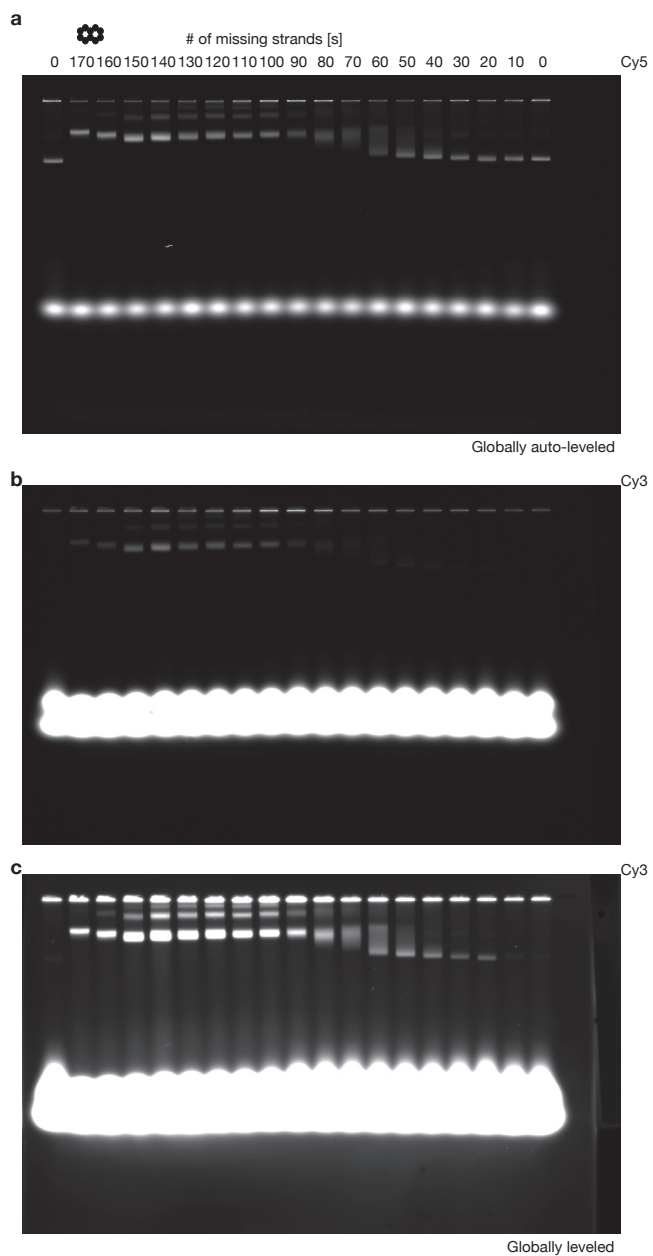

**Supplementary Figure 16:** Agarose-gel of ten-helix bundle object variants. Same samples as in Supplementary Figure 10. Gel-box was immersed in ice-water-bath. Cy5 and Cy3-channel (two different brightness-adjustments) are shown.

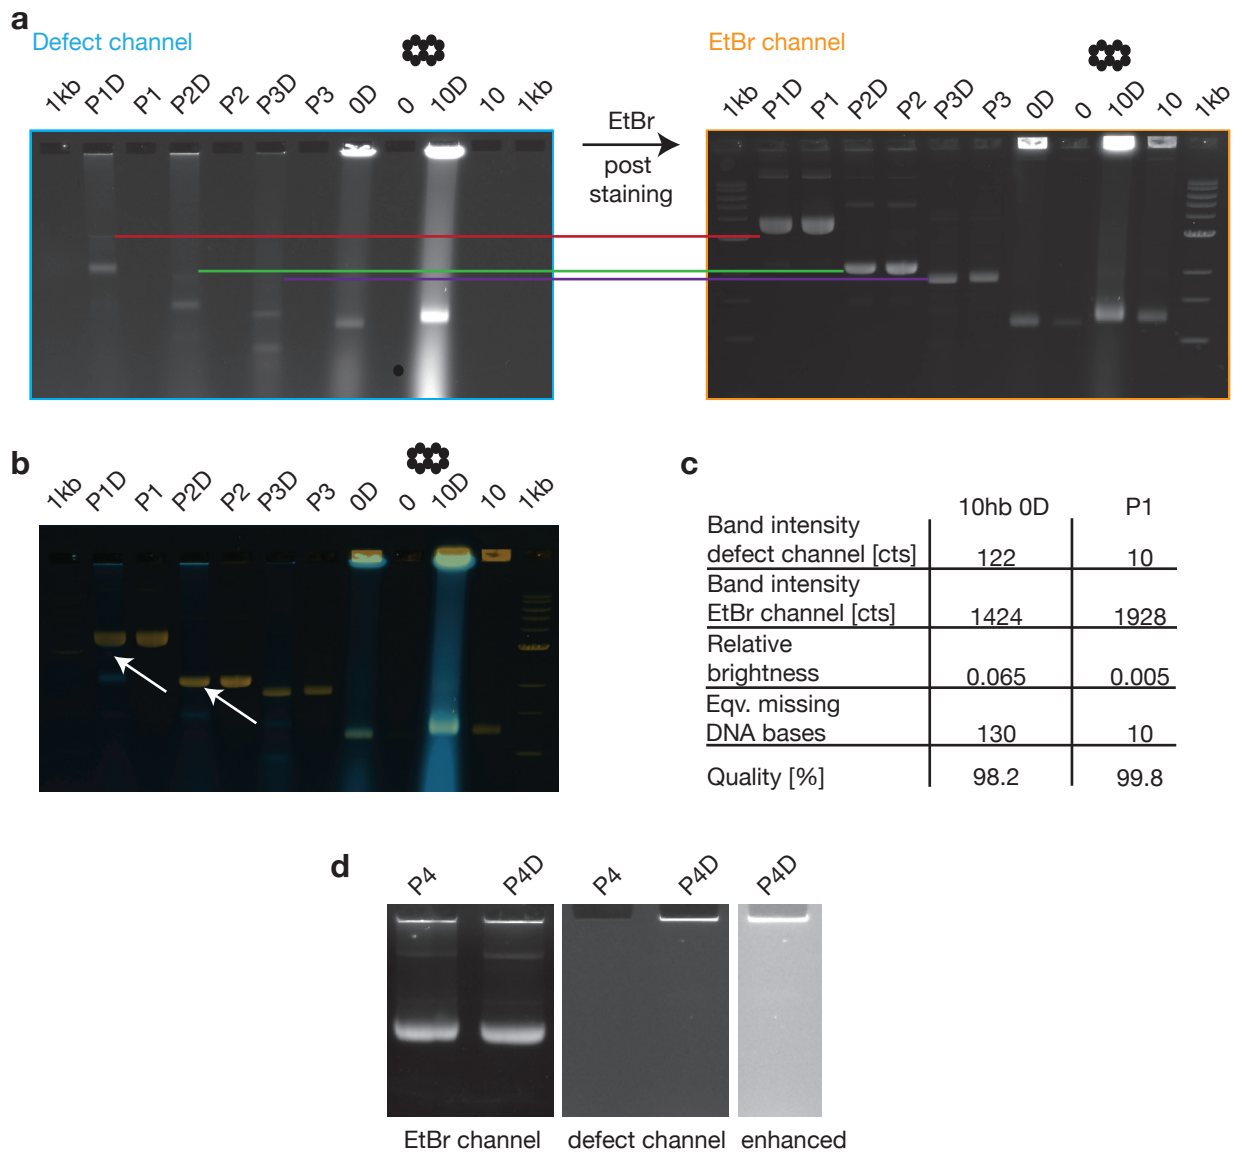

**Supplementary Figure 17:** Labeling dsDNA plasmids with the de-Brujin probe. (a) Three dsDNA plasmids with various lengths were electrophoresed together with the de-Brujin probe of order 3. The gel was laser scanned in the de-Brujin emission channel (left image), then soaked in EtBr solution, and scanned again (right image). Only samples labeled with “D” were incubated with the de-Brujin probe. The dominant plasmid bands in the right image (P1D - P3D) are labelled very faintly by the de-Brujin probe only at its leading edge. Also, additional bands show up that are not resolvable in the EtBr channel. These bands most likely arise from single-stranded nucleic acids contaminants. As positive controls for defect labeling, a ten-helix bundle with zero missing staple strands (0) and a version with 10 missing staple strands were also included. The bright leading bands that correspond to folded 10-helix bundle objects appear in both channels. (b) False-colored channel merge image. (c) Table gives peak intensities at the indicated bands. Based on the known defect content of the 10 helix bundle sample (see Fig 2.), the faint defect labeling intensity of the plasmid P1 was converted into an estimated amount of missing bases. (d) Another plasmid control was electrophoresed together with de-Brujin probes. In this case zero defect labeling is detected.

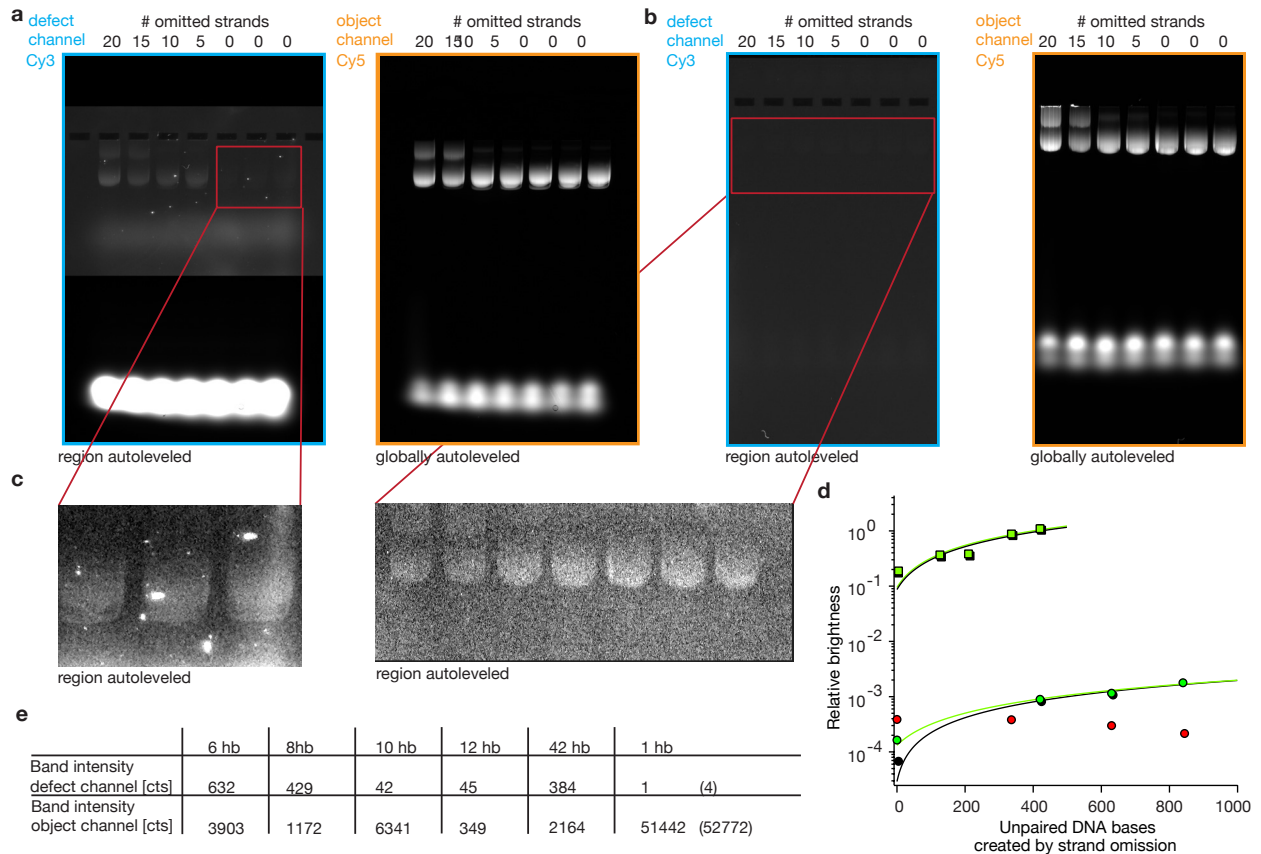

**Supplementary Figure 18:** Labeling a nicked dsDNA control structure with the de-Bruijn probe. The construct was composed of DNA scaffold and 180 DNA staples with 42 bases length each that do not undergo any crossovers. Therefore, the construct consists of a one-dimensional circular array of 42-basepairs long double-helical DNA domains that are delimited by phosphate backbone nicks. (a) The nicked dsDNA control was electrophoresed on a 3% agarose gel together with the de-Bruijn probe of order 3 and laser scanned in the Cy3 and in the Cy5 emission channel. (b) The nicked dsDNA control was electrophoresed on a 3% agarose gel together *without* the de-Bruijn probe of order 3 and laser scanned in the Cy3 and in the Cy5 emission channel to evaluate channel crosstalk. (c) Emission channel leakage from Cy5 into Cy3 filter sets explains the residual band intensity in the cy3 emission channel when only a cy5 emitter is included in the reaction. (d) Defect titration as in Fig (2) main with the nicked dsDNA control (circles) and the 42 helix bundle sample (squares). Red circles give relative brightness obtained from channel bleedthrough in b. Two methods of correcting for background were employed (subtracting background in front of the band under study, black data; and subtracting background from a sample free region in the gel, green data). Solid lines give linear fits to the data. For the nicked dsDNA sample: black line intersects at  $-15 \pm 5$  bases, green line intersects at  $-70 \pm 7$  bases. For the 42 helix bundle sample: both lines intersect at  $-44 \pm 7$  bases. Errors give error of the fit. (e) Table gives absolute signal strengths in the defect label channel obtained for various all-staple DNA origami reaction products after correcting for background by subtracting counts in front of the band under study. The nicked dsDNA plasmid (denoted as 1hb) had significantly lower signal strength. Value in parentheses indicates counts when using a different method of background correction (green method in d)).



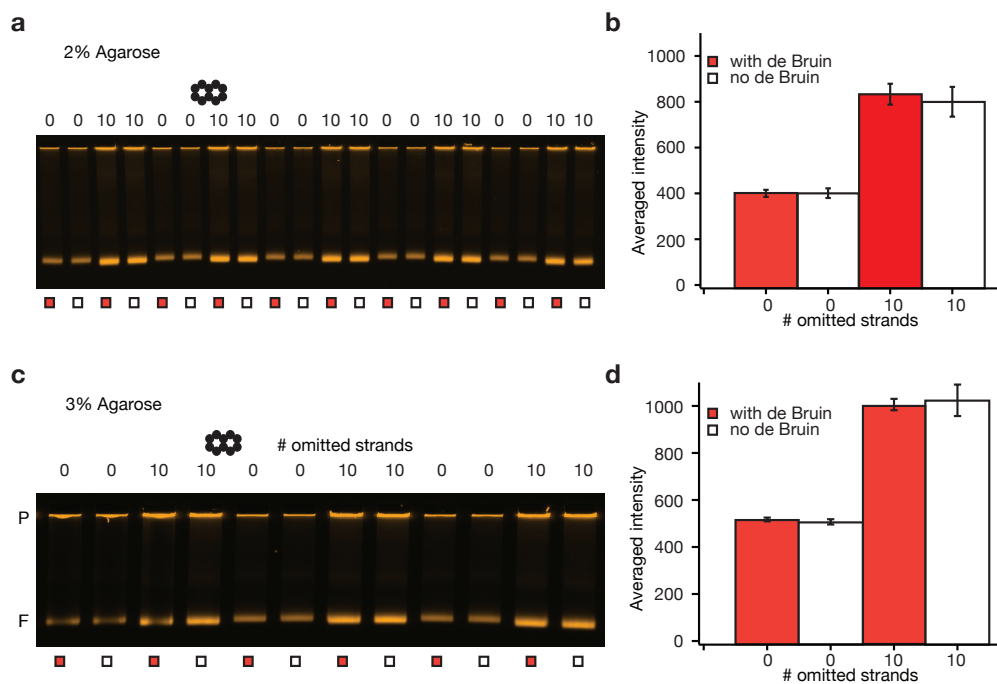

**Supplementary Figure 19:** The defect label does not affect the electrophoretic mobility of folding products. Versions of a non-“defective” and a defective 10-helix-bundle were electrophoresed on 2% and 3% agarose gels with and without the de-Bruijn probe of order 3 at  $8\mu\text{M}$  concentration. No difference can be discerned between the labeled vs unlabeled lanes.

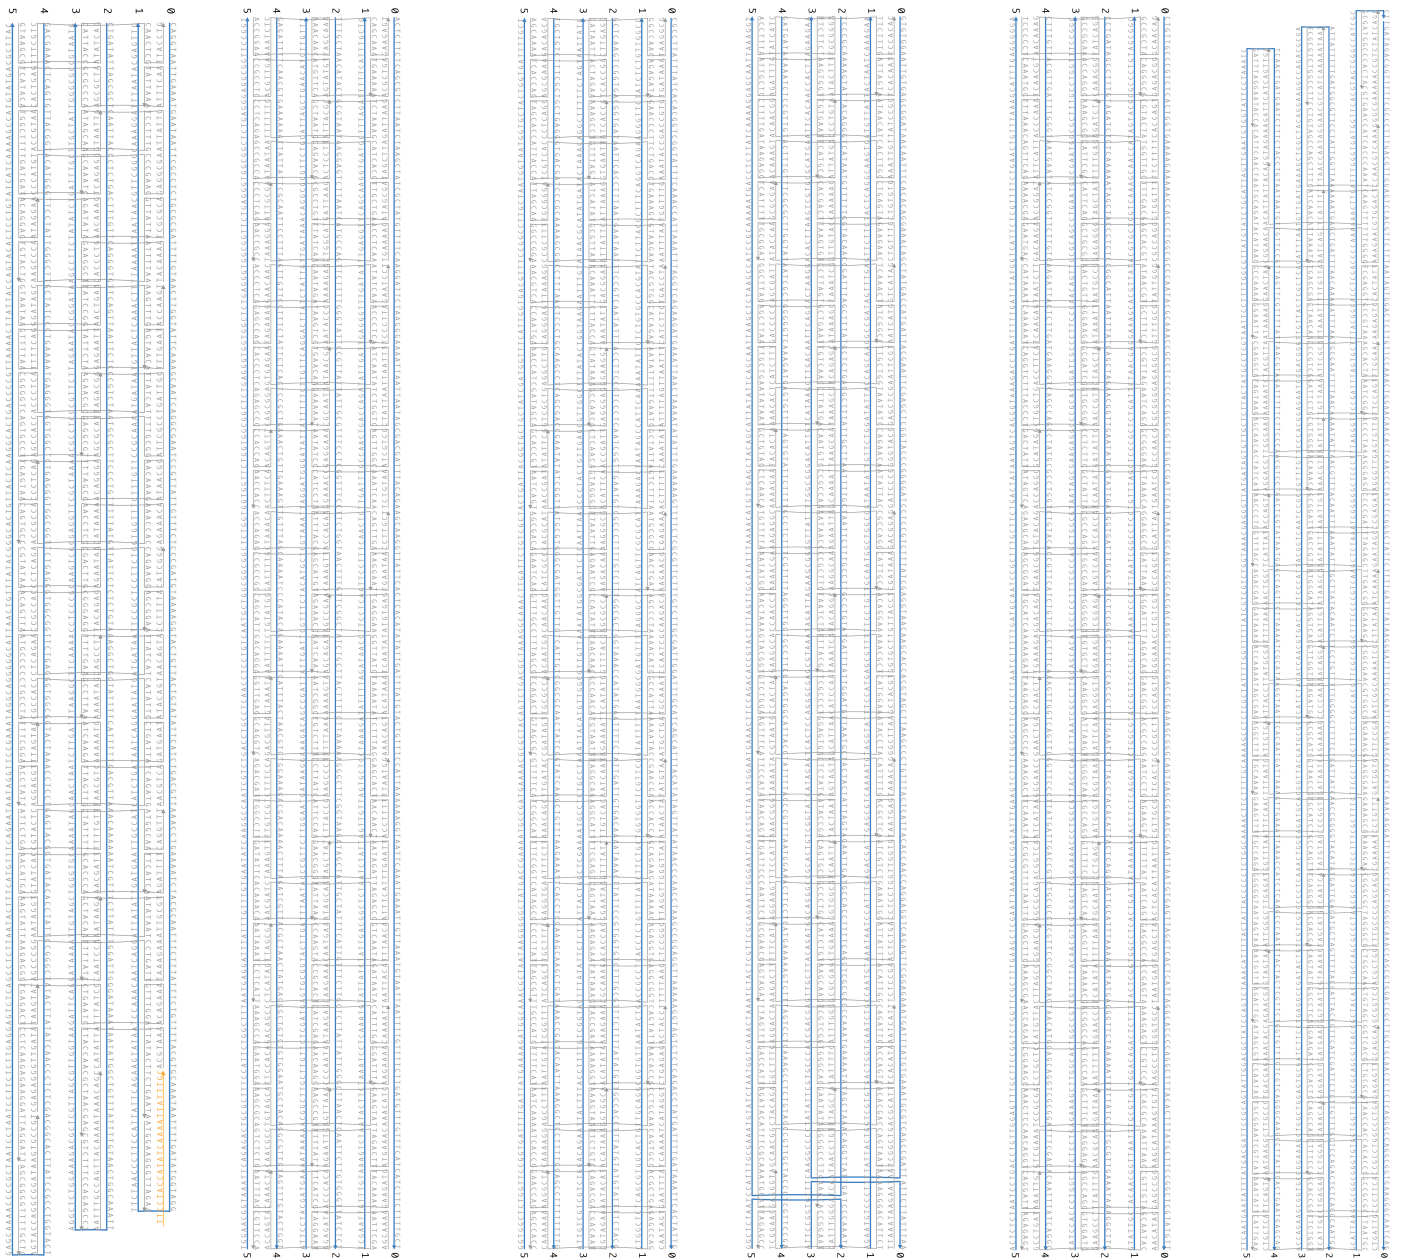

**Supplementary Figure 20:** Scaffold / staple layout of the 6-helix bundle object. Generated with caDNAo v0.2. Object-label is colored orange.



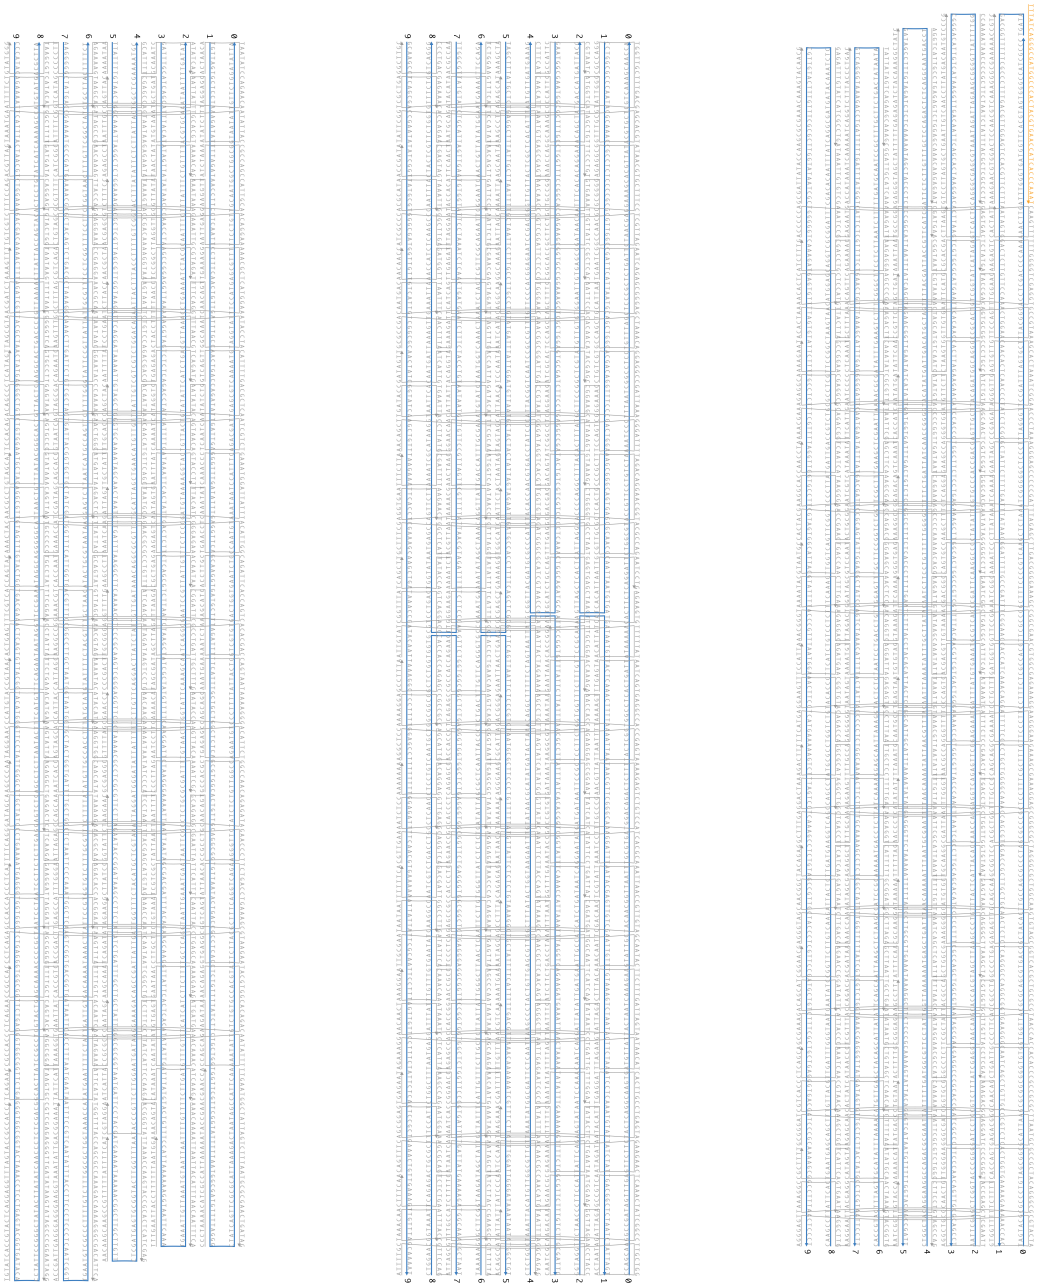

**Supplementary Figure 22:** Scaffold / staple layout of the 10-helix bundle object. Generated with caDNAo v0.2. Object-label is colored orange.



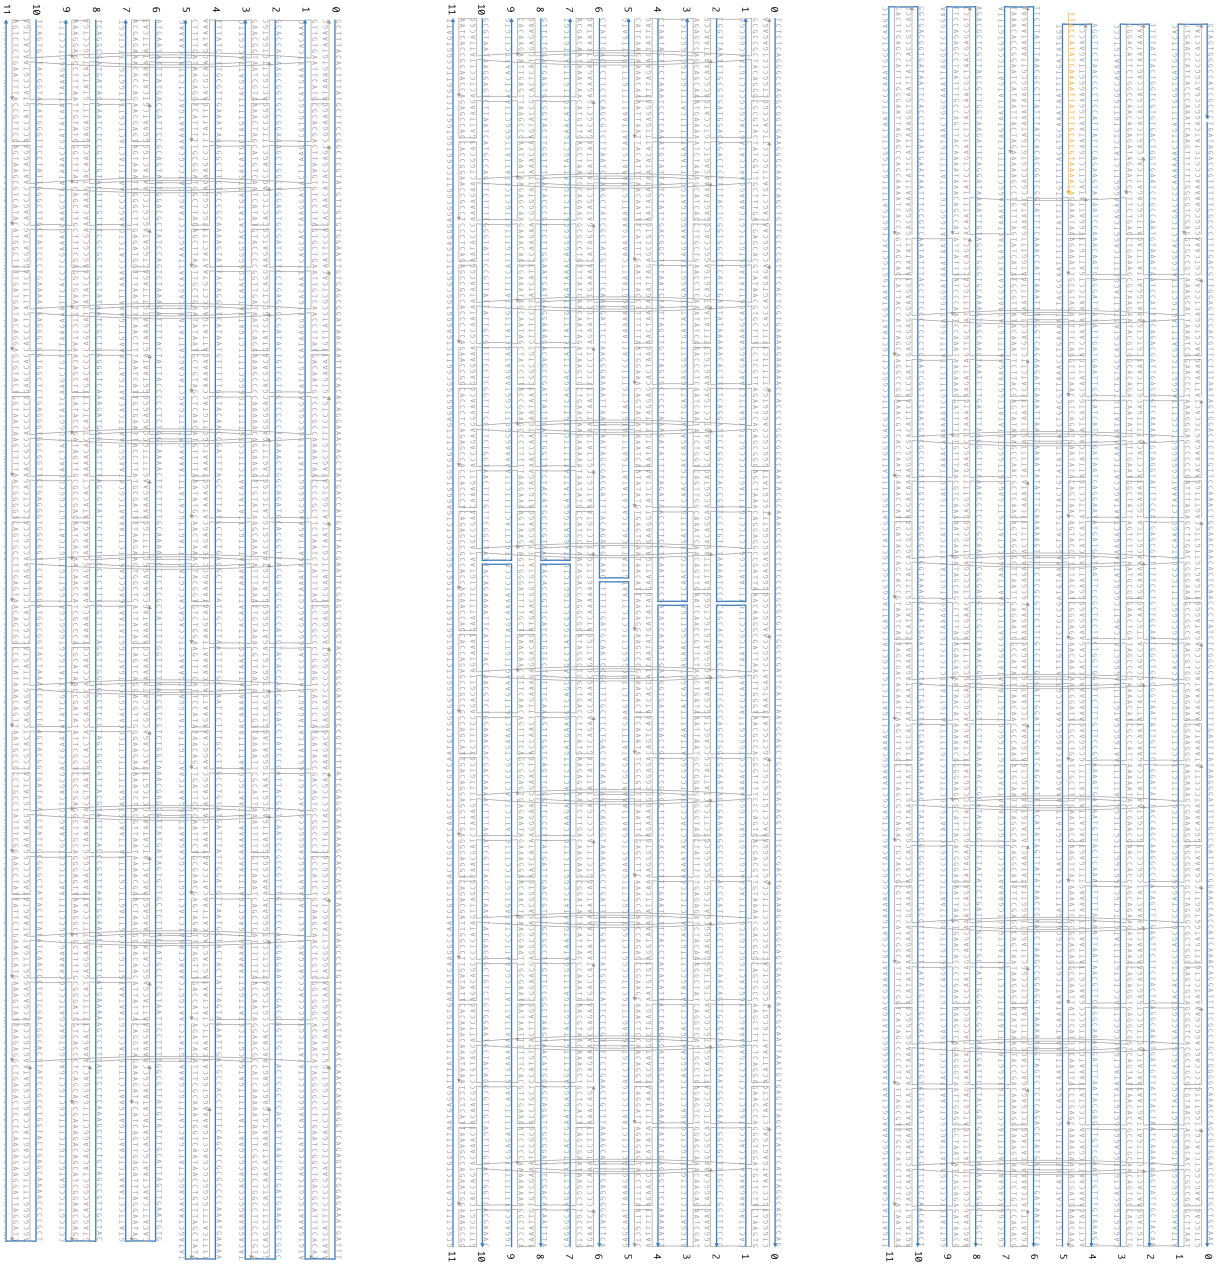

**Supplementary Figure 23:** Scaffold / staple layout for the 12-helix bundle structure. Generated with caDNAno v0.2. Object-label is colored orange.

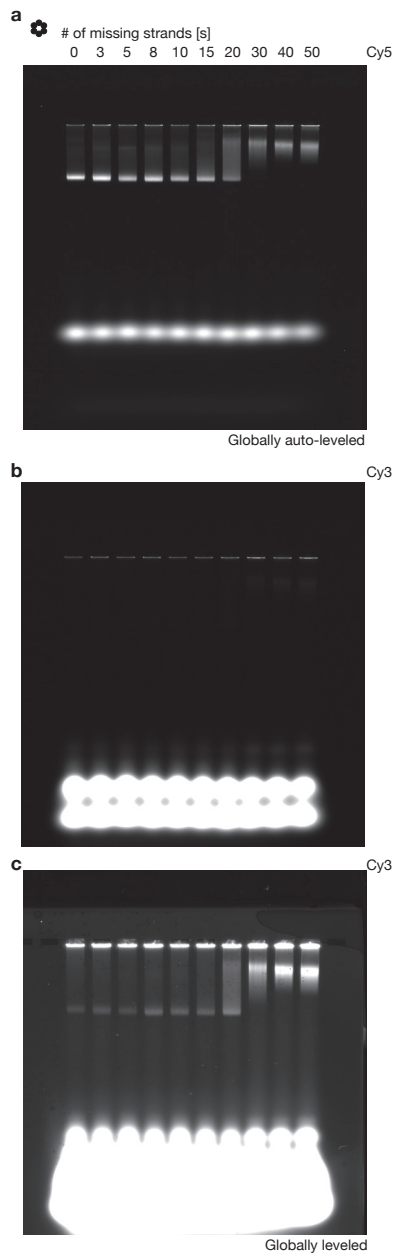

**Supplementary Figure 24:** Agarose-gel of six-helix bundle object. Cy5 and Cy3-channel (two different brightness-adjustments) are shown.

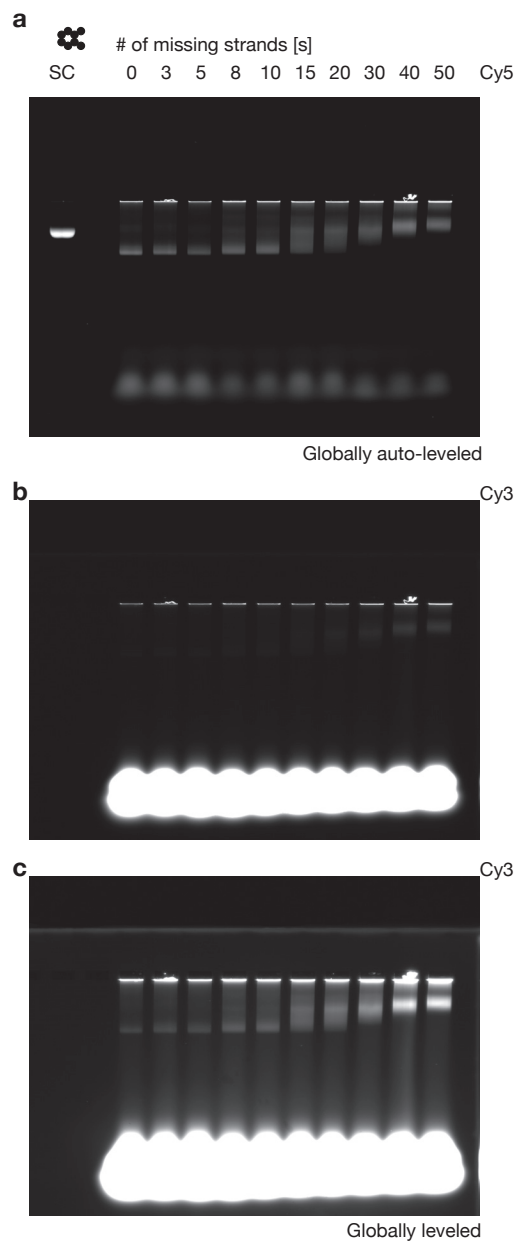

**Supplementary Figure 25:** Agarose-gel of eight-helix bundle object. Cy5 and Cy3-channel (two different brightness-adjustments) are shown.



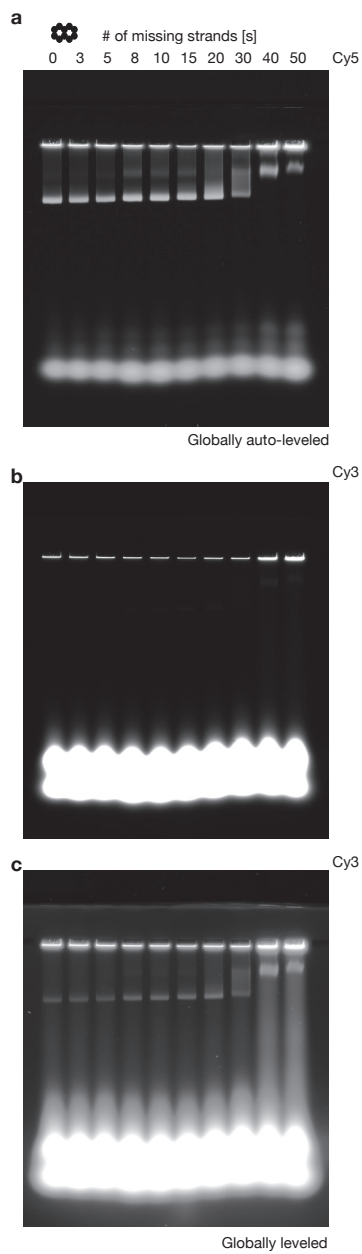

**Supplementary Figure 26:** Agarose-gel of ten-helix bundle object. Cy5 and Cy3-channel (two different brightness-adjustments) are shown.

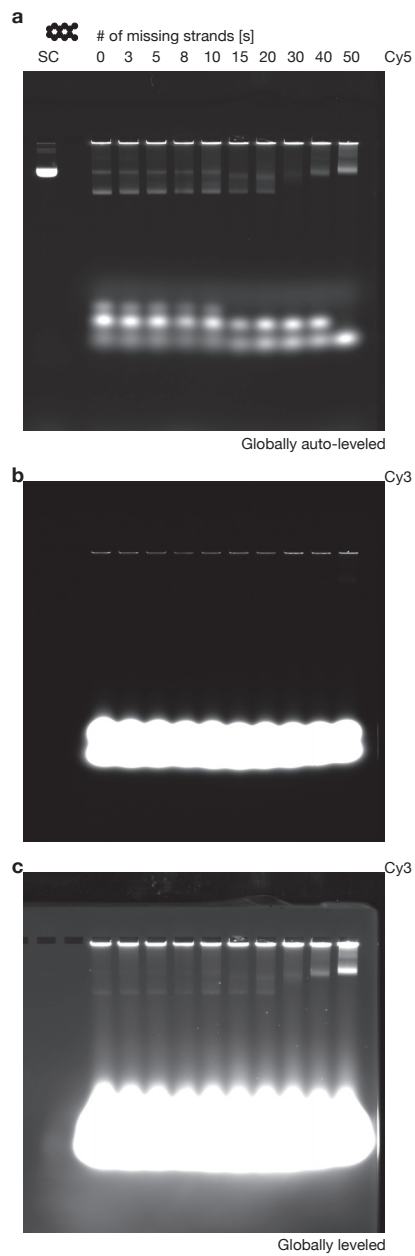

**Supplementary Figure 27:** Agarose-gel of twelve-helix bundle object. Cy5 and Cy3-channel (two different brightness-adjustments) are shown.

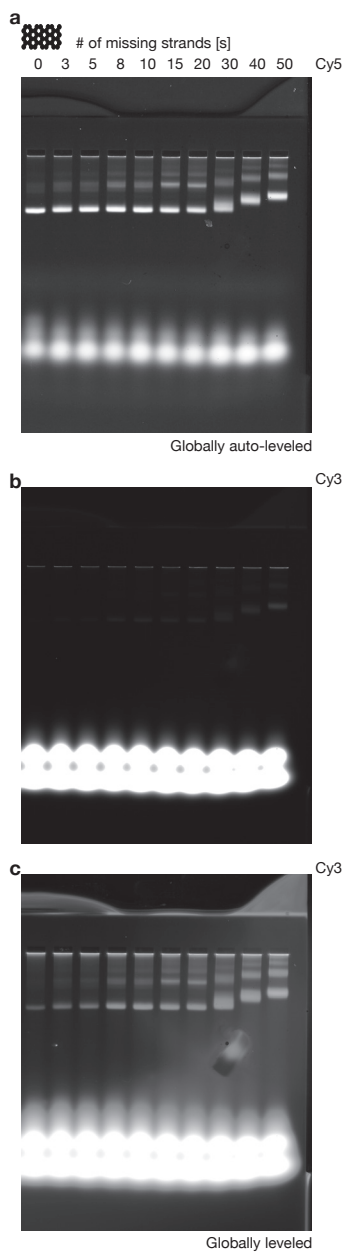

**Supplementary Figure 28:** Agarose-gel of 42-helix bundle object. Cy5 and Cy3-channel (two different brightness-adjustments) are shown.

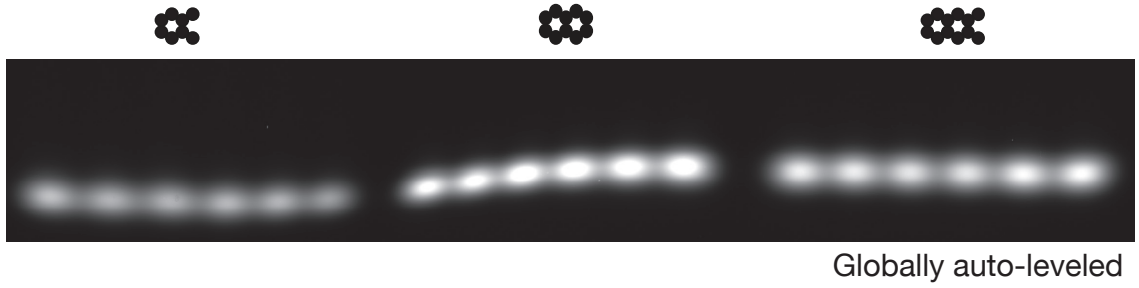

**Supplementary Figure 29:** Exemplary comparison of the fluorescence-intensities of different object-labels. 1 pmol of object-label DNA oligonucleotides for the 8,10 and 12 helix-bundle objects were electrophoresed in sextuplicates. Varying age and sequences might account for the intensity-differences.

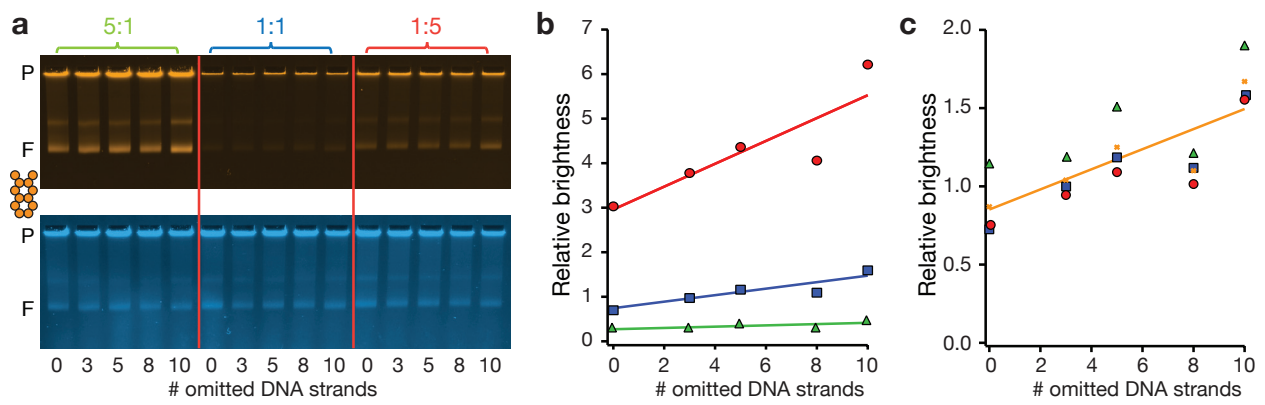

**Supplementary Figure 30:** Effect of different object label incorporation efficiencies on the relative brightness of bands in the defect channel vs object label channel. Three groups of pseudo-defective variants of a 10-helix-bundle were self-assembled. In each group, the fluorescently object-label strand was added together with a non-labelled copy of the same strand in different stoichiometries. (a) Upper gel image: object label channel. Lower gel image: same gel scanned in the defect label emission channel. (b) Relative brightnesses. (c) Rescaled relative band brightness by using the stoichiometry information.

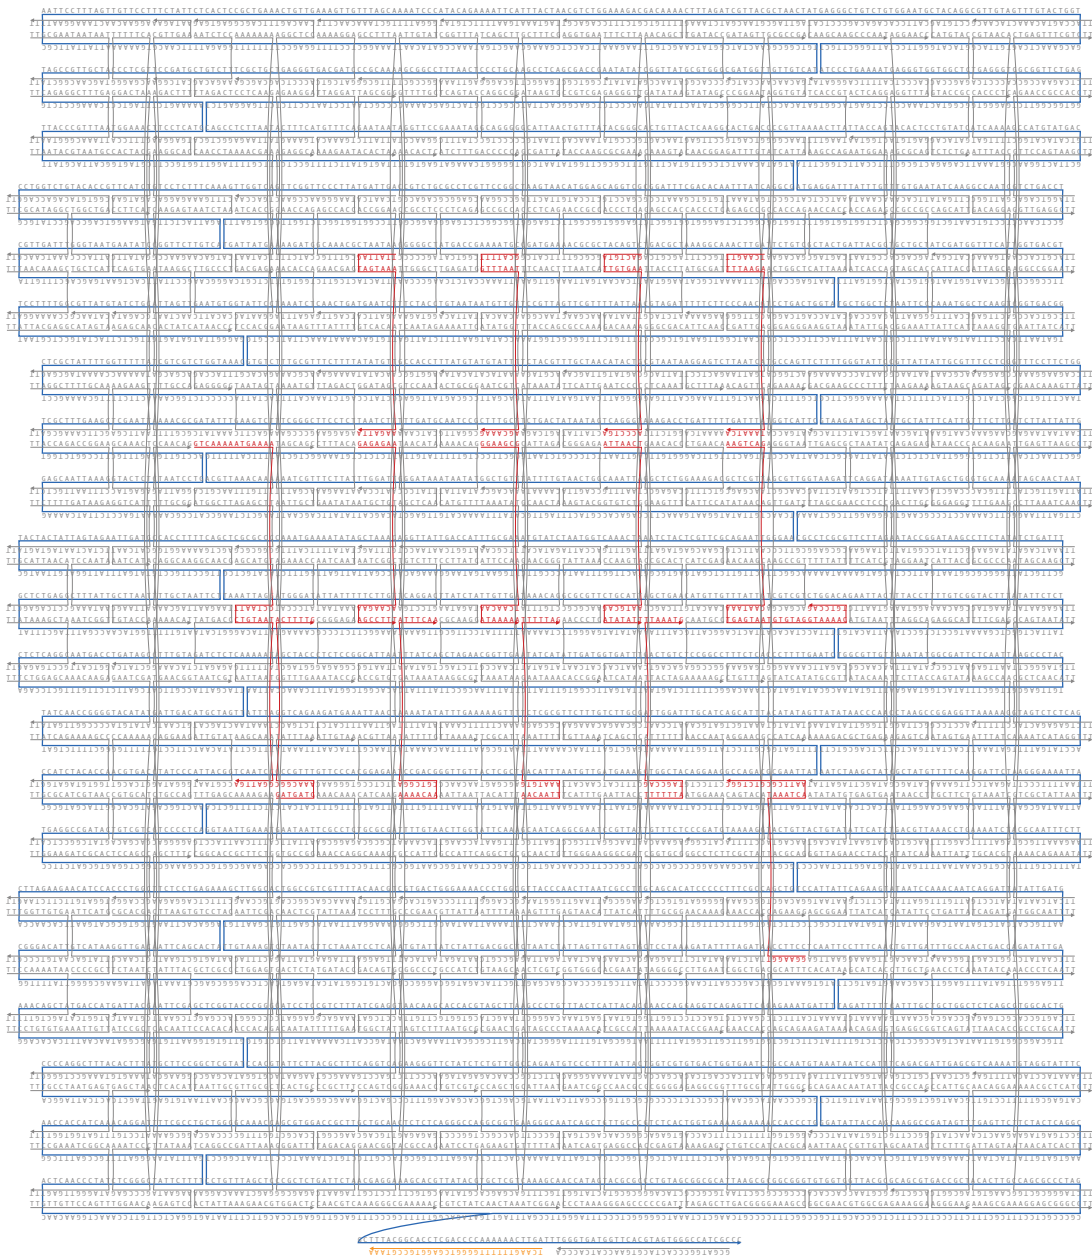

**Supplementary Figure 31:** Scaffold / staple layout of the 42-helix bundle (“internal defects”-variant). Generated with caDNAno v0.2. Object-label is colored orange. Omitted oligonucleotides are depicted in red.

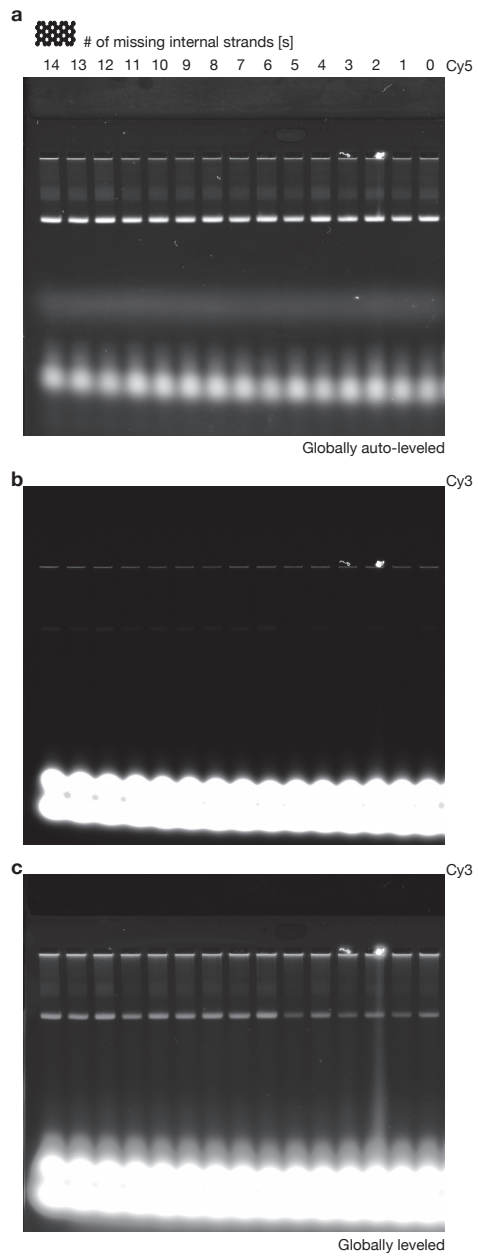

**Supplementary Figure 32:** Agarose-gel of 42-helix bundle (“internal-defects”-variants). Cy5 and Cy3-channel (two different brightness-adjustments) are shown.



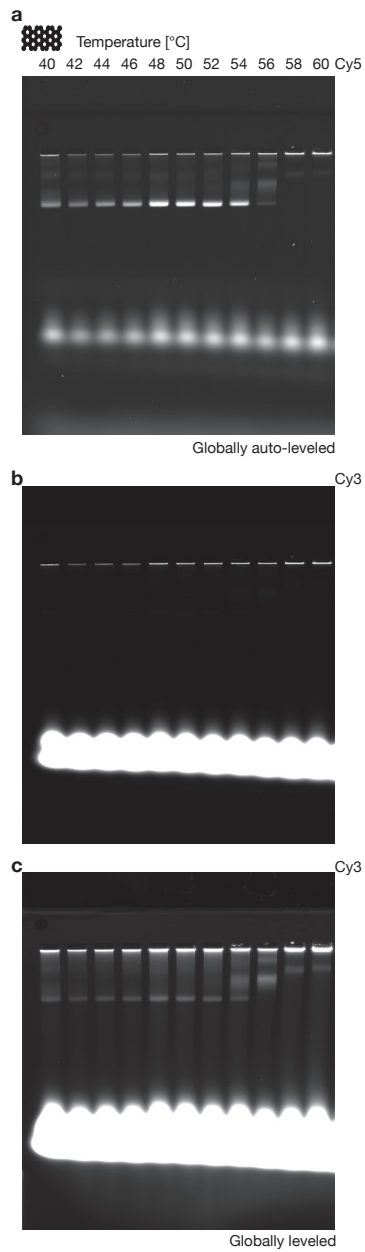

**Supplementary Figure 33:** Agarose-gel of 42-helix-bundle. Samples were incubated for 2h at the indicated temperatures and then electrophoresed. Cy5 and Cy3-channel (two different brightness-adjustments) are shown.

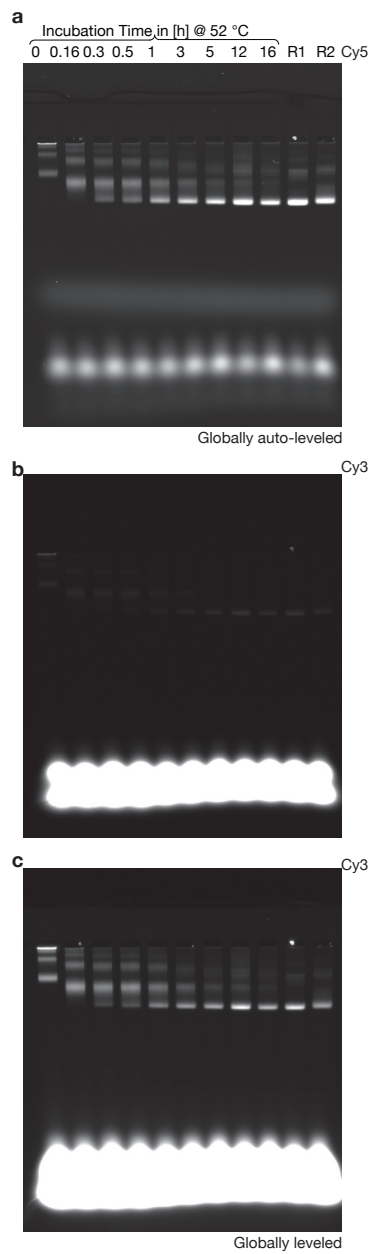

**Supplementary Figure 34:** Agarose-gel of 42-helix-bundle. Samples were folded at 52°C for different amounts of time. Cy5 and Cy3-channel (two different brightness-adjustments) are shown.

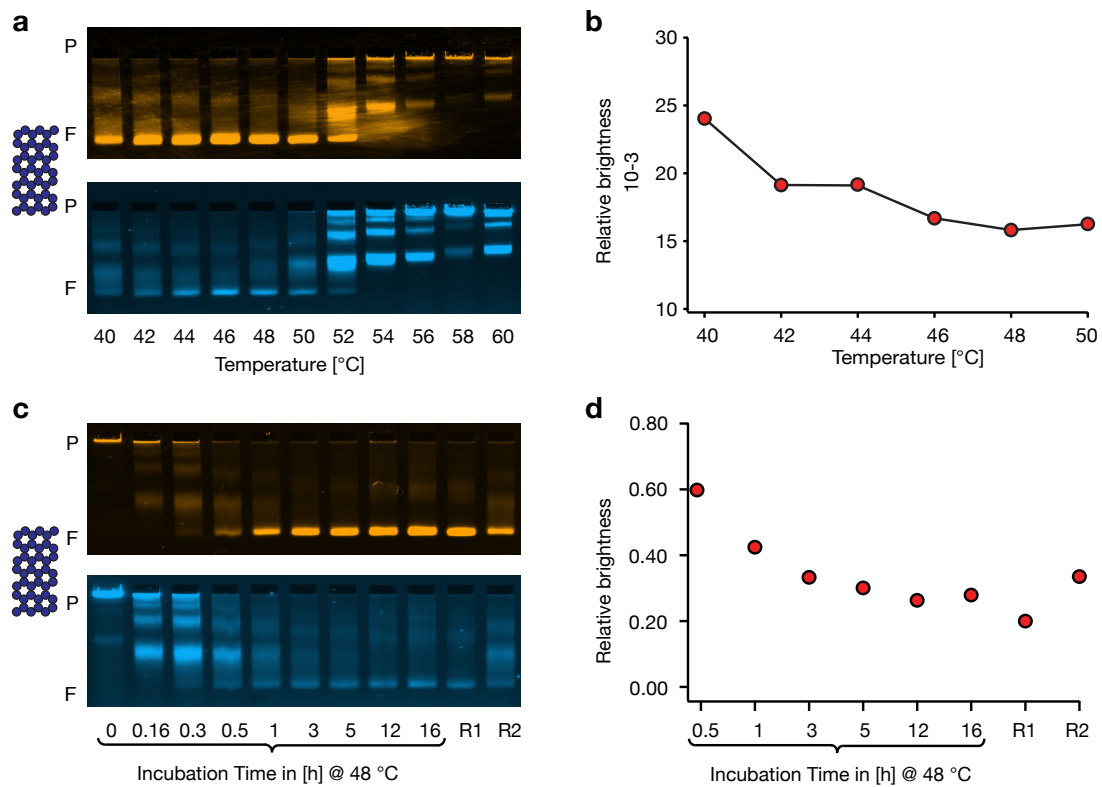

**Supplementary Figure 35:** As in Supplementary Figure 3 in the main manuscript, but experiments were carried out with a another version of the 42-helix-bundle object that differed in its topology of chain connectivity. In contrast to the version examined in Supplementary Figure 3, this version folds best at 48°C (b). Also, the difference in folding quality as judged by the relative defect labeling intensity for constant temperature folding versus thermal ramping (R1) is minor.

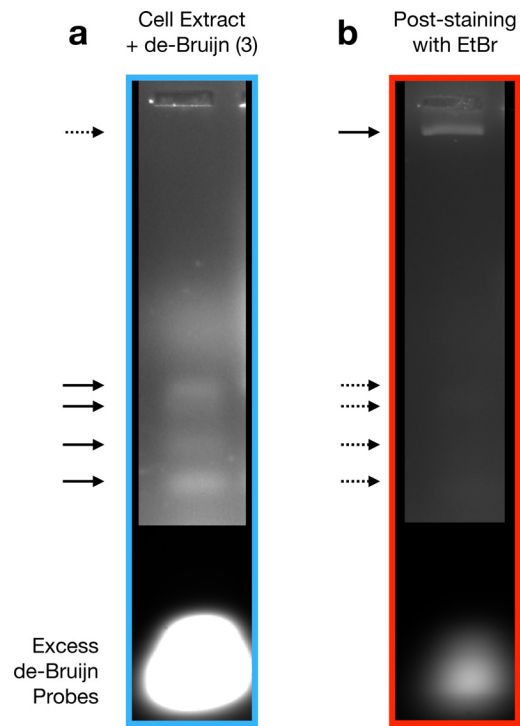

**Supplementary Figure 36:** Labeling E.Coli cell extracts with the de-Bruijn probe. Cells were lysed mechanically, the extract was incubated with the de-Bruijn probe of order three, and then electrophoresed on an agarose gel. The gel was first laser-scanned in the de-Bruijn defect label channel, then soaked in an Ethidium Bromide solution, and scanned again.



| Sequence                                         | Length |
|--------------------------------------------------|--------|
| AGGAACAACAAAGGAATTT                              | 21     |
| AGTTAGCGTAACGATCTAAAGTGATACCCCCACGCGTATAGC       | 42     |
| CATTCCACAGACAGCCCTCATCAAGCAAGCCCAAT              | 35     |
| CCTGTAGCATGTACGAGCCACGTACCCGCGATACAGTCTCTGA      | 42     |
| TTACCAGTACAACTACAACG                             | 21     |
| TTGCGAATAATAATTAGCAACGGCTATT                     | 28     |
| AATCTCCAAGACAGTTAGACTCCTCAAGTCATAATGACGAGA       | 42     |
| AAAAAAGGAATACTCCACGGAATAAGTTATTTTCAGTTG          | 42     |
| AAAAGGAGATCGTCTTAGGATTGAAACAAAAGAATACACTAA       | 42     |
| GCCTTTAAGATTCAGTCACAAAACATATAAAGAA               | 35     |
| CGGTTTAAGTTAAATCAGTACCTATTTTCATCTTTGACCCCA       | 42     |
| TCAGCTTACAACTATATGGTAAATACATACATAA               | 35     |
| AGGTGAACGGTGCCTCGTATAAACAGTACCAAGCGCGAAA         | 42     |
| TTTCTTATAATAAGACAAAACAGTATGTTAGCAA               | 35     |
| GATAGTTCGTTGGGCGATTGATGATTAAGACTCCTGCTTAA        | 42     |
| ACGAGGGTTTTTCAGCAGATA                            | 21     |
| TTCTCAGAACCCACCCTCACGTAACAACCTGAGTAAAGGTCGAGGAA  | 49     |
| TTCAGAGGCTTTGATTAACGGGTAATT                      | 28     |
| TCACCGTTAAGTTAAGCCAGAATGAAACAAATAACCAGAG         | 42     |
| ACTCAGGCCGTAATATCACCATAGCTATCTTACGA              | 35     |
| GTTCCAGGACTAAGATATTCTCAGTGAATTCGAAAGAAGTGCTATCA  | 49     |
| TGAAAGTATAAGAGGCTGCACAACCTAAAACGAATGACCAA        | 42     |
| GGAACCTATTATTCTAGCGGGTATTAGTAGTAAAAAGATTA        | 42     |
| TTAATGCCCCCTGCCAGGGCGCATTTTGTTTAATAGCAAAG        | 42     |
| TAACAGTGCCCGTAGAGGGTTGACTGTATTGTGAAACCCCTGA      | 42     |
| CCTTGAGCAACGGAGATTGTATCATTATAACGGGGTCAGTGCCGGAAT | 49     |
| TTGTCATACATGGCTTTTGATCACCCCTC                    | 28     |
| TTAATACGTAATGCCACTACGAGATGAACCTTCAT              | 35     |
| ATTTACCATTGGCGACAGGATTTGCACACAAGAAAAGTACTTTTCGAG | 49     |
| TCAATCAACCGGAAAATCCAAGAGAGAAACAAGAAAGCCTTT       | 42     |
| GCCGGAAGCGCCAACAGCCGGAAGCGTCAACAAAATAAAA         | 42     |
| CGACCTGACCCCTCATAATTTGATTAACATAATGCAGATATATT     | 42     |
| AATCCTCATCGCCTGATAAATAGAGCCGAACGAGC              | 35     |
| TTAGTTCAGACGTTCCAGTAAGCTT                        | 25     |
| TTGCGATAGGCAAAATCAACGTT                          | 22     |
| ATCACCGTTTGTAAACGTCAATGGCTTAGAGCTTGGGCGCG        | 42     |
| CAGCATTCTGATATTCACAAAGCGCAGGAGTACTGGTAA          | 42     |
| TCAAGTTTTAAGATAAATCAACAGTTCTGAGAACTGTTTA         | 42     |
| ATGAAACATTAGCACAAAGAAAAGATAGC                    | 28     |
| TTACGTCCACCAAGAACCAGCCACCTT                      | 25     |
| TTTAACAAAGCCAAAAGGATT                            | 22     |

|                                                   |    |
|---------------------------------------------------|----|
| TGCTCATATTACCCGGCTGACGGGTACAGACCAGGTT             | 39 |
| GAACGAGCGTTTGCAGCCACCTAAGGGAACCGAACAGAGGCA        | 42 |
| TTGGGCTGGTAGAAATGTATGGGATTTGCTAAACAACCTT          | 42 |
| TGAGATGCGGTATCCTCAGACGAGGCGCAGACGGAACACTC         | 42 |
| TTCAACTAACCGGAGCTTTCGTAGTAAATGAATTTCTGTAT         | 42 |
| TTAATCAGCGGCTTAACCGCCCTCCATGTACTTAGCGATTA         | 42 |
| TTACCTTATCTACGAACAGCTTTTGTGCTTTCCAGACGT           | 42 |
| ATGCGATTGCCTTTCACCCTCTGTGCGAAATCCGCAAAGTA         | 42 |
| CACATCTTGCCTCATGACAAGAACCAGACTTTCATCGGA           | 42 |
| GAGCCAGATATTGAGAATACCCAAAAGAGACGAAGCCCTTTT        | 42 |
| TTCCGTCACCGCTGAGTTTCGTCTT                         | 25 |
| TTATTACGAGGCATAGTACATAACG                         | 25 |
| AGAGCAATAAAAAACAAAATAGCGAGTT                      | 28 |
| ACTGCGAGGAGGGAAGGTAACATACCAGTCAGGAGCGCCGA         | 42 |
| AATAACGCGGAAATTAATCATCCATTGCATTACCCATCGAT         | 42 |
| ACGCAATAGTAAGCCAATGAAATAACCCCCAGCTAGGAGGT         | 42 |
| TTCCAGAAGGAAACGAATTATCATT                         | 25 |
| TTAGGCTTTTGCAAGCTTCAAAGCGATT                      | 28 |
| TTAGACTAGAGGAACCTTACAATAAGAATAATGCTGTGTTAGC       | 49 |
| GGATAGCTTAATGCACCGGTAGTAAATTTATCTATTGTAA          | 42 |
| ACTGCGGGGATTGAAAACAGATATATCATGTTTAAATATTGCAA      | 49 |
| AATCGTCTCAACCGTAATAAAAACTTTTTCAAATTTAAAT          | 42 |
| TTCAATGCTTATCGGGAGACCAGTTAAAGTACGGTGTCTGATTTG     | 49 |
| AATCCCAATCACATCATAACGCAAGACAAGAATGTTAAA           | 42 |
| GCGTTTTATAAGGCAACTAATCGTTGAAAATAGAA               | 35 |
| AAATATCGTCAAAAATGAAAACCTAATTCTGTAATGATTGA         | 42 |
| AGACTTCAATAGTATTTTGAATTAATGGTTTGAATACCG           | 42 |
| GCCCGAAAACACCAAGATTTAAGGCTCCCAACAGTTTCAGCGGAGTGAG | 49 |
| AAAATCACTGAACAGCTTTCCATCCATATAACAGTTGATT          | 42 |
| TTCAATAATAAGAGAGGCGCGAATT                         | 25 |
| TTACCAGACCGGAACCTTAATTGCTCTT                      | 28 |
| AAGTCAGCAATAATGAGTAAGTCTGGCAGGAACGCAACTCGAACCAC   | 49 |
| AGGGTAAATGACCAACTGGCTCATTAAACAGTAGCAACCACC        | 42 |
| TTGAGCGATCTTACTTAGCGAACCTCCCCTAAGAATTCATCG        | 42 |
| AGAGTACGCAAACTATTAAGCTGTACCA                      | 28 |
| GGATTAGCAAGAGTAATCTAACTTTGAAAGAGGACAAGGCACTGAGGAA | 49 |
| CAACGCTCCACCAGGACAGAAAGGTGTAGACAACAACCATCG        | 42 |
| ATCCTGACTAATATGTAATCATGTAATATAGCTTAGATAT          | 42 |
| CAATTTCCGCGCAGCAGCAAGGTTTACACCCTCATTTTCAGGGATAT   | 49 |
| TTATTAGTTGCTATGTTGAGGCTT                          | 25 |
| TTCTTTTGATAAGAGGTCATTATCAATAATCATA                | 35 |
| AATTGCTACGATTTGAACCAGCATCTTAGAAGGAACCCCTCAGCAGCGA | 49 |

|                                                    |    |
|----------------------------------------------------|----|
| AGCTCAATTATCCCCGCCTCAGCCCCGTTTTGCGGCGCTTTTGCGG     | 49 |
| GCAACTACAAAATACCCTCAGTTCATCGATAAGTGTGAGGCTTGCAGGG  | 49 |
| GAAGTTTCAGAGCCGAGCCACAGCGTCAGATATAAATAACCGATATAT   | 49 |
| TTTGAAGATAGAAGGCGCCCAAGATTTGTAAATCGGTGAGTAAATCA    | 49 |
| TTAAATCAGATCCTTAAATCAAGTT                          | 25 |
| TTGCATTAACACCTCAGAGCTT                             | 22 |
| AGCATGTATTTCAATTACCTGCGGCACCGCTTCTGTGCCAAG         | 42 |
| AATCGGCTCGCGCACATCAAGTTGAGGAGACAGTG                | 35 |
| ATTCCAATTTGAATTACATTTAGCCGTCGTAAGCA                | 35 |
| CCAAGTAATAACGGAATTACCCACTAACACGAATA                | 35 |
| TTTTATTGCGAGGCGTTCCCAATTCTGAACAAGCCCTTTTA          | 42 |
| AGGTAAACAGAGAGATAGCAAGTAGCACGGAATTAAGGAACC         | 42 |
| TTAGAGAATTTGAGTTAAGCCTT                            | 25 |
| TTATAAGCTAGCCTGAGAGTT                              | 22 |
| AATCGGTAATAAAGTCCAATATCTACTAATAGTAGTATT            | 39 |
| GAGGCATCGACAAACATTACCGCTTATCCGGTATTGACTTGC         | 42 |
| TACAAAGTTTGCCAACGAGACACTATCATAACCC                 | 35 |
| AGAGATCTATGACCTAAGAATTAGCAAACCAACAG                | 35 |
| GGTAGCTAAAATGTACGCAAGACACGTTTACCAGGAGGGGG          | 42 |
| CGGAGAGCGGGAGAAAATAATAATCAATTATATTTTCATTTG         | 42 |
| TGATAAAGTCCAATAGGTGGCTCAATAGAAAATTCTATTACA         | 42 |
| TTCTAGCCGCAAGGTAGATAACCTTATCATGGTCAATAACCT         | 42 |
| ATGATATATAAATAACGTAGATTACCAGCGCCAAAAACGAAC         | 42 |
| CATCAATAACCCCTCAACGCGCTATAAAACCATGATACAT           | 42 |
| GACAGTCTCAAATTATTACGGGGGACATTCAACAAGAAAA           | 42 |
| GGCCGGACAATGCCAACATGCATCGAGCGAACGAGTAGATT          | 42 |
| ACAACGCATACAAAATTGGGTATATAACAAAAGACGCTGAGA         | 42 |
| AATTGAGAAGCCAACTTTTTA                              | 21 |
| TTGTAGGGCTTCGAACAAAGTTATT                          | 25 |
| TTTCTGGAGCAAACAGAGGTCATT                           | 25 |
| GAATCGAATATGTACCCCGGTTGATATT                       | 28 |
| TCTGACCTAAATAACTAGCATATTGTATCCGTAAT                | 35 |
| AAATGCTGATGCAAAACCAATCTTCTGATGAAACATCGGG           | 42 |
| TATATGTATCATATGCGTTCAGATTCAAAGGGAGAAAAAC           | 42 |
| ACCTCCGATAGTGATTGAAAATGCTTCTCAGGTTAATTATT          | 42 |
| TTCTGAGAGACTACCGCTCAACATT                          | 25 |
| TTATCAGAAAAGCCTGGTGTAGATGGTT                       | 28 |
| AAGCAAACCCGGGTACCACAGACAATATTTTGA AAAAGACG         | 42 |
| GTCACGTCCAAAAACGTAATC                              | 21 |
| TGGGAACAACAAGAGGCGAAAACAGGCAAAGCACGTTGT            | 42 |
| TTCTCCGACGTTAACCTCGATTGGCTATTGACCTGAAAAGCGTCCGCTTT | 49 |
| AACAACCAATTAATACCAAGTGCCATTGAGGCTGCGCCAGGG         | 42 |



|                                                   |    |
|---------------------------------------------------|----|
| AGCGAGTTCGCATTAAAGCTACGAACTGCCAACAGAGATAGATGTCGTG | 49 |
| CAACATTTCAATTTGATTCGCCTTGGGAAGGGCGATAAGGCGA       | 42 |
| CTTTCATTAGCTCGTGAATTCGCCATGTAATAAAAGGGACGAATCGG   | 49 |
| AGAATCCATTTATCAAATCATAGGTTT                       | 28 |
| TTTAATTTCCCTCCAGTAATAT                            | 25 |
| TTGCGCATCGTAACGTATCGGCCTCATT                      | 28 |
| TTTGAGCAAAAAGAACTTTACCTGGAGTGGTTTTCGTTGCGCTCACTGC | 49 |
| CAGTACATATCTAACGGCTGATTTCTTTTTCGCTATTGGGC         | 42 |
| ATATATGATACAGTGGTTAGAACCCTACCCTTCTG               | 35 |
| GACGACACGTGCATGTCAACCTCTAATCATCTGTGAGCTAA         | 42 |
| AGGGGACCAGGCAAGGCAACGAGCTGAAAAGGTGGTTTTCGGG       | 42 |
| GATGAATTGAGTGATTGAAAAGGCATCACCTGGTAATATCCCA       | 42 |
| TTAAGAAATTCGCTATAGCAAGCTT                         | 25 |
| TTGGAAGATCGCACTCCAGCCGCCAGGG                      | 28 |
| GTGCCGGATTATTCAGAAACCCTCCATTAGCAGC                | 35 |
| GCCATTCTACAAAATGTCTTTGCCTGATAACATACATCAA          | 42 |
| GCAACTGTGATTGCGAACGGGCTGTTTACATTAGAAGTCAGA        | 42 |
| CGGTGCGAGAAAACCCGCACCTTCAGCTGAACACCGGTCTTT        | 42 |
| GGCCTCTTCGCTATTACGCAGAACAGTAAAGCCGTACGACGA        | 42 |
| TGCACGTAATCCTGTCAGATG                             | 21 |
| TTCAATATAAAAACAGAAATAT                            | 25 |
| TTTGGTTGTAAATGTCCCGTT                             | 22 |
| CGCACGAGCCCGAGAAATCCC                             | 21 |
| AATTCGAGAGCTAAACAGGAACTATTAAGAACGTGGACTC          | 42 |
| TCCTTTGCCTCGTGAACGGTACGCCAGGAGAGCGGCCCT           | 42 |
| ATTTAAACGAGCAAGAAGTGTTTTATTGCCCTTACTCGTC          | 42 |
| TTATCATGCGGTAGAGGCCACCGAGTAGTACTAGGGGC            | 42 |
| TTATCATGCGTAACCGTTGTAGCAATACGGCCTTGCTTCTG         | 42 |
| CATATTCTCAACAGATAACCTCATAGCGTTAGGCAATTTATAAGAAA   | 49 |
| CTGATTAATGTTGGATTATATATAAACGTCATAGGAAT            | 42 |
| GGAAGGTTAAATCAAATTCGCTGTGTAGGTAACGTCAG            | 42 |
| GAATTGAAGCGGAAAATAATGGACAGCTGGCGAAAAACCAC         | 42 |
| TTTCAATATCTGCTGCTATAATTT                          | 25 |
| TTCCAAAATAAGCTGTTTTT                              | 22 |
| CCCCGCTTATGACATTCATGTGGATGTTCTTCTAAGTT            | 39 |
| GCTCGCCAATAGTGTGAATTCGCCAGGGGATAGAAAACAT          | 42 |
| TGATACCTTAGAATATTAATAAACGACGGCCAG                 | 35 |
| CTTGTATATTTGATATTTGATAATAAGGCGT                   | 35 |
| CGTGGTGGCCATCTAATAGATGTTATATTTTCCAGTCACG          | 42 |
| CAGGGCTAAATTTTCGCGAGAGAATAAACCCGGA                | 35 |
| GAGTAAAGGTGGCAACTAATAGTAACATTAAGTTGGGTAAC         | 42 |
| CTGGTTGATTTTTATCCAATTTACTAGAAAAAGC                | 35 |

|                                                        |    |
|--------------------------------------------------------|----|
| TGACCTCCTTGAATAATATCTAACAAAGGGGGATGTGCTGC              | 42 |
| AAAAATCACAGAGGAATGGATTATTACGCAGAACAAATATTACCGCCAG      | 49 |
| GCAAATGAGAGTCAGCTTAGGTTCTTACCAGTATAAATCGCC             | 42 |
| TTCAGTGCCACGCTGAGA                                     | 18 |
| TTCTGTGTGAAATTGTTATGGTCA                               | 25 |
| ATCCGCTTAAAGTGTAAGCCTGGGGTT                            | 28 |
| TTAACACCGCCTGCAATT                                     | 18 |
| AAGAATACGTGGATACGAGCCTAATGCCCCAGCA                     | 35 |
| GATTCAACAGTCACGAGGCGGTTACCCAAAAGAGT                    | 35 |
| ATTGGCACAGCAGAAGATAAATAAATCATTCTCCCATCAA               | 42 |
| CGTCTGATGAGGCGGTACAGTACCCAGCAAACCTCATGGCAAA            | 42 |
| GCTCAATCCATTGCAACTATCTCTTTGAGCGGTCAGGGAAG              | 42 |
| TTGAAATACCTACATTTTGAC                                  | 21 |
| TTTGCCATAATGAGTTTGATGGTGGTTTT                          | 28 |
| CTCACATGGAAGCACACAATCCACACAACCGAGC                     | 35 |
| AAGCGGTTAGACAGTAGAATCCAACGTCAAAGGGCGAAAAAC             | 42 |
| TTGCAGCCAGTCGGGAAACCACCCTTCTAGTCTTTAATGCG              | 42 |
| TGGCCCTAATCCTGCGTATAACGTCTATCAACTAAATCGGAA             | 42 |
| CACCGCCCAGCTGCATTAATATTCTGGATAGCCCTAAAACA              | 42 |
| AGCTGATAATCAGTCTATGGTCCCTAAAGGGAGCCCCGATT              | 42 |
| GGGCAACCCAAACGCGCGGGGAACGACCATAAAAAATCCGAAC            | 42 |
| GAACTCAAACAGGAAAAACGCTCATGTT                           | 28 |
| TTGCCTGAGTAGAAAAACCCTCAATT                             | 25 |
| TTCCGAAATCGGCAATAGGGTTGAGTTT                           | 28 |
| TTATAAGGGCGAAATATTACTCGAATTCAGGAAGTCAATCTGAACGGTAATCGT | 56 |
| TCAGCCGATTAAAGGGATTTCACGCTGACTCTAGAGGATCTATTAA         | 49 |
| AATTAACCCACACAGGCGAACGTGGCGAGAAAGGAACGCTGC             | 42 |
| AGAGCGGCAACTCGGTATTAGGATGATGAAACGGCACTTTTG             | 42 |
| CGTGCTTCCCGAACATAACATAAAACAACGTGGAATTTCAA              | 42 |
| TGCTTTGAAGTTTGAGATTAGAACAATTAATGTGTTTTAG               | 42 |
| CTACAGTTTTCGGTTAGGAGTTTTTATAGCCAGTTAAATG               | 42 |
| TGCGCCGTAGAGCTTGACGGGGAAGCCCCCGCCGAGAAGG               | 42 |
| CGCTTAACTGTCCATCACGCAGGGTGGTCGCATTTACATAA              | 42 |
| CAAGTGATTAGTAATAACATCACTTTT                            | 28 |
| TTCTAGGGCGCTGGATGGCAATTTT                              | 25 |
| TTGTTGTTCCAGTTTGAACA                                   | 21 |
| AGAGTCCAAAGAACTTAAGTGTCTACCTTTCTCAGGAGAAAGCTTTC        | 49 |
| AAAGCGAAAGGAGCGGGCGTT                                  | 21 |
| GCGATGGCCCACTACGTGAACCATCACCCA                         | 30 |
|                                                        |    |
| object-label                                           |    |
| Cy5-TCAAGTTTTTTGGGGTCGAGGTGCCGTAAA                     | 30 |

**Supplementary Table 1:** list of oligonucleotide-sequences of the 42 helix-bundle

| sequence                                    | length | defect variant: |
|---------------------------------------------|--------|-----------------|
| TGATAAAGTCCAATAGGTGGCTCAATAGAAAATTCTATTACA  | 42     | 3               |
| TTCTAGCCGCAAGGTAGATAACCTTATCATGGTCAATAACCT  | 42     | 3               |
| ATGATATATAAATAACGTAGATTACCAGCGCCAAAAACGAAC  | 42     | 3               |
| GGTAGCTAAAATGTACGCAAGACACGTTTACCAGGAGGGGG   | 42     | 5               |
| CCTGTAGCATGTACGAGCCACGTACCGCGATACAGTCTCTGA  | 42     | 5               |
| GAGGCATCGACAAACATTACCGTTATCCGGTATTGACTTGC   | 42     | 8               |
| TTATCATGCGTAACCGTTGTAGCAATACGGCCTTGCTTGCTG  | 42     | 8               |
| TTATCATGCGGTAGAGGCCACCGAGTAGTGAGACTAGGGGC   | 42     | 8               |
| TTTTATTGCGAGGCGTCCCAATTCTGAACAAGCCCTTTTA    | 42     | 10              |
| AGGTAACAGAGAGATAGCAAGTAGCACGGAATTAAGGAACC   | 42     | 10              |
| ACTGGCAGGGAGGGAAGGTAACATACCAGTCAGGAGCGCCGA  | 42     | 15              |
| AGCATGTATTTCAATTACCTGCGGCACCGCTTCTGTGCCAAG  | 42     | 15              |
| ATGCATTGCCCTTTCACCCTCTGTGTCGAAATCCGCAAGTA   | 42     | 15              |
| TTACCTTATCTACGAACAGCTTTTGTGCTTTCCAGACGT     | 42     | 15              |
| CGGAGAGCGGGAGAAAATAATAATCAATTATATTTTCATTG   | 42     | 15              |
| ATCCTGACTAATATGTAATCATGTAATATAGCTTAGATTAT   | 42     | 20              |
| CGGTTAAGTTAAATCAGTACCTATTTATCTTTGACCCCCA    | 42     | 20              |
| AAAAGGAGATCGTCTTAGGATTGAAACAAAAGAATACACTAA  | 42     | 20              |
| AAAAAAGGAATACTCCACGGAATAAGTTATTTTCAGTTG     | 42     | 20              |
| AATCTCCAAGACAGTTAGACTCCTCAAGTCATAATGACGAGA  | 42     | 20              |
| TGAGATGCGGTCATCCTCAGACGAGGCGCAGACGGAACACTC  | 42     | 30              |
| AAATATCGTCAAAAATGAAAACCTAATTCTGTAATGGATTGA  | 42     | 30              |
| AGACTTCTAATAGTATTTTTGAATTAATGGTTTGAATACCG   | 42     | 30              |
| TTCAACTTAACGGAGCTTTCGTAGTAAATGAATTTCTGTAT   | 42     | 30              |
| AAAATCACTGAACAGCTTTCCATTCATATAACAGTTGATT    | 42     | 30              |
| TTAATCAGCGGTTAACCGCCCTCCATGTTACTTAGCGATTA   | 42     | 30              |
| AGGGTAAATGACCAACTGGCTCATTAAACAGTAGCAACCACC  | 42     | 30              |
| TTGAGCGATCTTACTTAGCGAACCTCCCTAAGAATCATCG    | 42     | 30              |
| AGGTGAACGGTGCCTCGATAAACAGTACCAAGCGCGAAA     | 42     | 30              |
| CAACGCTCCACCAGGACAGAAAGGTGTAGACAACAACCATCG  | 42     | 30              |
| GAGCCAGATATTGAGAATACCCAAAAGAGACGAAGCCCTTTT  | 42     | 40              |
| GATAGTTCGTTGGGCGATTGATGATTAAGACTCCTGCTTTAA  | 42     | 40              |
| AATAACGCGGAAATATTCCATCCATTTGCATTACCCATCGAT  | 42     | 40              |
| ACGCAATAGTAAGCCAATGAAATAACCCAGCTAGGGAGGT    | 42     | 40              |
| CAGCATTCTTGATATCACAAGCGCAGGAGTGTACTGGTAA    | 42     | 40              |
| GGATAGCTTAATGCACCGTGTAGTTAATTTATCTATTGTAA   | 42     | 40              |
| TCAAGTTTTAAGATAAATCAACAGTTCTGAGAAACTGTTTA   | 42     | 40              |
| AATCGTCTCAACCGTAAATAAAAACTTTTTCAAATTTAAAT   | 42     | 40              |
| GAACGAGCGTTTGCAGCCAACCTAAGGGAACCGAACAGAGGCA | 42     | 40              |
| AATCCCAAATCACATCATAACGCAAGACAAGAATGTTAAA    | 42     | 40              |
| TAACAGTGCCCGTAGAGGGTTGACTGTATTGTGAAACCCTGA  | 42     | 50              |

|                                              |    |    |
|----------------------------------------------|----|----|
| TTAATGCCCCCTGCCAGGCGGGCATTGTTTAAATAGCAAAG    | 42 | 50 |
| TGAAAGTATTAAGAGGCTGCACAACCTAAAACGAATGACCAA   | 42 | 50 |
| TTGGGCTGGTAGAAATGTATGGGATTTGCTAAACAACTTT     | 42 | 50 |
| AGTTAGCGTAACGATCTAAAGTGATACCCCCACGCGTATAGC   | 42 | 50 |
| TCACCGTTAAGTTTAAAGCCAGAATGGAAACAAATAACCAGAG  | 42 | 50 |
| CGACCTGACCCCTCATAATTTGATTAACCTAATGCAGATATATT | 42 | 50 |
| GCCGGAAGCCGCCAACAGCCGGAAGCGTCAACAAATAAAAA    | 42 | 50 |
| ATCACCGTTTGTTTAACGTCAATGGCTTAGAGCTTGGGCGCG   | 42 | 50 |
| CACATTCTGCCCTCATGACAAGAACCGAGACTTTCATCGGA    | 42 | 50 |

**Supplementary Table 2:** list of omitted oligonucleotides of the pseudo-defect-variants of the 42-helix bundle.

| Sequence                                    | Length |
|---------------------------------------------|--------|
| GGCGAAAAACCGTCTATCAGG                       | 21     |
| AAGAGTCGTAAACAATTAATTTTTGTAGCCAAAAGAACTAA   | 42     |
| GAATAGCGACCGTAAATATTTAAATTGTAACCCCTCACCAGTC | 42     |
| GATGGTGGTAAACCGGATAATCAGAAAAGAGGCTTTATTGTGA | 42     |
| GCGGTCCGGCCTCAGGTAATCGTAAACAATGTTTTGTAGTAA  | 42     |
| CTGATTGTTCTGGTTCATTGCCTGAGAGAAATATTTTCAGTG  | 42     |
| CGCCAGGGCTGCGCGAGAGGGTAGCTATAAACGAACCGGAT   | 42     |
| TGAATCGGCTATTATCAATATGATATTCGACTATTGCATAGG  | 42     |
| CCCGCTTATAAGTGATTCAAAAGGGTGAAGAGGCCAACTT    | 42     |
| TAATGAGTAAAACGTCATATATTTAAAGAGCTCGGAACGA    | 42     |
| AACATACGTGGATGGAAGCCTTATTTCCAGGATTAATGT     | 42     |
| CTGTTTCTAAGTGTGTGTACCAAAAACCTATTTGCGCGAA    | 42     |
| GATCCCCCGCCAAGCAAAATAGCAAGCTGTAGTACTA       | 42     |
| GGCTTAAGGAGTGAGCATTAAACATCCAAGTCTGGACCCTAC  | 42     |
| TCTCGAAAGCAACGCGCAGCTGAAAAGCGAACGTTTCATG    | 42     |
| TTAAATAAGAATAAAAAGGGACATTCTTCGGAAC TAGAGCC  | 42     |
| AATTTAAGCGTTATATTATTATTAAGTTAGCAATGCGGGA    | 42     |
| ACTTTTTGTAGGGCACATCAACCGATTGCACCGTATATTCG   | 42     |
| ATGCTGATGTAATTAGAAAATCATATGTCAGACTTGCGCCG   | 42     |
| TTTTAACTATAAAGCGCAAGACACCACCCTTATGCTTTC     | 42     |
| CAATAGTCGACAATCGTAGAAAATACGAACCAGAAGGCTC    | 42     |
| TGAAAACCTTCAACTGGCATGATTAAAGCCCTCAGATTGCGA  | 42     |
| TCTGTAACATCCTAGGAAACCGAGGAAACCACCAGACGTTT   | 42     |
| AAACAGTTGTCTTTTTTAAGAAAAGTAGGTTGAGGTAATG    | 42     |
| AATTACACCGCACTCAAGAAACAATGAAAATAAATTAGCGT   | 42     |
| AGCAAAATAGGAATAGAGATAACCCACAAATTTACCAAACTA  | 42     |
| TACAAAAGAAGGCTCACCCGAAACAAAGACAGGAGATAGGAA  | 42     |
| AGAAAACAACTCCCATAAAAACAGGGATGAGTAACCCCTCAG  | 42     |
| AACGTCATTAGTTGTAACGTCAAAAATGTTTCGGATTAGTAC  | 42     |
| ACGTAAATTACCAACGCTAACGAGC                   | 25     |
| GCGATGGCCCACTAC                             | 15     |
| GTGAACCATCACCCAAATCAAGTTTACATTATTACAG       | 37     |
| ACCCTAATGGGAAGAGCAACACTATCATAAAGTTACAAACG   | 42     |
| CGGCGAATATGCGAACCAAAATAGCGAGCCCAATAGATGG    | 42     |
| CGGGCGCTTGAGATGGGGTAATAGTAATAGCATGACGACGA   | 42     |
| TAACCACCTTGCCCTGCGGAATCGTATTCTGGAGCTTTCCG   | 42     |
| CGTACTAACCCAAATTTAAACAGTTCAGTTTTGAGCATTCCG  | 42     |
| TCGTTAGACCTTCACAGGTCTTTACCCTAACCGTTGTGCGGG  | 42     |
| GGGATTTGGACAGATGCATCAAAAAGATAGAAAGGTGTGCTG  | 42     |
| TTTTTATACGGTCATCGCGTTTTAATTCTGCAATGCAGTAC   | 42     |
| TCACGCATCCGCGAAAACCTCAACAGGTAACGCAACAGGAGA  | 42     |

|                                            |    |
|--------------------------------------------|----|
| ATAACATACAACGGCTTTTGATAAGAGGATTATGATCATGCG | 42 |
| TTGCTGGCATCTTTTTGCTGAATATAATTAAGCCCTTATGA  | 42 |
| ACAGGAACCAACCTAACTAAAGTACGGTTAAATCATTACGC  | 42 |
| ATCGTCTTCCATTGATTCCCAATTCTGGTGGCAGCCCTGC   | 42 |
| ACACGACCTACAGAAGATACATTCGCAATGGATGAGGGTA   | 42 |
| GAACCCTCCTCAGCTAGCACCATTACCAGTGAATTGTTTGT  | 42 |
| AATATTTAGGCTTGAACCATCGATAGCAGAGGGAGGCCAACG | 42 |
| AGCCCTACAACAACGTTTGCCTTTAGCGGTTTACCTAACAAC | 42 |
| GCAGAAGATTCTTTTTCGGTCATAGCCGGAATAACAGTAAT  | 42 |
| CCTGCAAAGCCTTAAATCAAATCACCGACATAAATCTGTC   | 42 |
| TCTAAAGTTTTTCCCTCAGAGCCGCCAACTCCTTCAGAACG  | 42 |
| ATCAATAGTGAGAACCCTCAGAGCCGCGCAATAGAAAAAT   | 42 |
| TGAGGAATGTATGGCAGCATTGACAGGAAGCAGATAATCAAT | 42 |
| AATAGATTAAGTTGATATTACAAACATAGCAATATTTAA    | 42 |
| GAAGTATTGAGCAAAGCGCAGTCTCTGAGAATTGTTTTATT  | 42 |
| TCCTTGACCCTAATGGCTTTTATGATTGAGAGGGCAAATC   | 42 |
| TTATCATACCCTCACGGGGTCAGTGCCTAGCGCATGAGGCGT | 42 |
| TTATCATCTCAGAAATGCCCCCTGCCTAAAAATAGGCCTTAA | 42 |
| ATATAATAATAGGTAAGTATTAAAGAGCCAATCCATTTTATC | 42 |
| ATGGAAGGGTTAGAA                            | 15 |
| TTAACCAATAGGAACGCCATCAAAAAATAT             | 30 |
| TGTTAAATAGTAAGAAAAATCTACGTTAAGCACTATTGGAAC | 42 |
| AGATTGTGATAAAATTTAAGAACTGGCTTGACGGATCAAAA  | 42 |
| TATGTACTGCCAGAGGTTAATTTCAACGAAAGCGCCTGTTT  | 42 |
| GAGAATCCCAATCTGACGAGAAACACCGGTCACGGCAGCAA  | 42 |
| CAAAGGCCAAATGCTCAACGTAACAAAGGCCGCTAGCAACAG | 42 |
| ATAAATCAAAAATCAAGAGTAATCTTATAACGTTATTGGG   | 42 |
| CAGTCAAAGCGGATTGAACGGTGTACAGGGAGGCCGATTAA  | 42 |
| AATGTGTTCAAATAATCATAAGGGAACCAATCCTGCTCACTG | 42 |
| AATTTTTCGAAGCCCTGCTCCATGTTAAAGAGTGGGTGCC   | 42 |
| ATACTTTATTGCTCAGATTGTATCATCTCTTTGTCCACAC   | 42 |
| ATAAAGCAGCTTAAGACCCCGCAGGATTTCAAAGTGCATAG  | 42 |
| AAGGCAAAATATGCAAAACGAAAGAGGCCGCCAGCGACGGAG | 42 |
| TACTAATTAACAGTAAACGGGTAATACATTTTGTAACAG    | 42 |
| TATTTTCGACCATTGGCTTTGAGGACTACAGATTCAATCATT | 42 |
| TCACCGATCACCGAGCGAAAGACAGCAGGCCAACTAAGGCG  | 42 |
| AAATATCCAATGACAGGGAGTTAAAGGTACGTGGTGACCTA  | 42 |
| AAGACAAGAATCAACATCGCCACGCATATGCGCGGAGAAA   | 42 |
| TTGTCACTCGGCATAAACAGCTTGATACCGAACGATATGTA  | 42 |
| ACATATATTTTCAATTTGATCGGTTTCAGTATTACTACCT   | 42 |
| AGTATGTCGGCTCAGTTGAAAATCTCCAGCAAAGAAGAGT   | 42 |
| AATACCGAGCCACTAGAAAGGAACAACATATCAAGAATCCT  | 42 |

|                                             |    |
|---------------------------------------------|----|
| CAAAGTTCGCCGCGATTTTGCTAAACACAGTTGACCTTGCT   | 42 |
| CTTACCGTGGCCTTTTGTGCTTTCCAGAGCACTTTAATGG    | 42 |
| CCCAATAGAATGGATTCCACAGACAGCCCATTTGACAAAATT  | 42 |
| AGCGCTATCATAACACTGAGTTTCGTCCAACCTGTTACCTG   | 42 |
| GAGAATTGTTTTAATTTTCAGGGATAGCAAGTTGACCAAGT   | 42 |
| TACAGAGACAGTTACCGCCACCCTCAGACAGAAGGCATCGGG  | 42 |
| AACGATTAACATGAGTATCACCGTACTCATGGCAACAGTTT   | 42 |
| CATATTATTATCCTGAGACTTAAGTAT                 | 28 |
| AATTTGCCAGTTACAAAATAACAGC                   | 26 |
| TCGCGTCTGGCCTTC                             | 15 |
| CTGTAGCCAGCTTTCCCAACGTCAAAG                 | 27 |
| TGAGCGACACTATTTGAGAGTCCGTAATAAAACGGAATTA    | 42 |
| GCGGATCCGAGATCCCGATTTAGAGCTCATTATGTTTACC    | 42 |
| GCCATCGTTCCGAAGAAAGGAAGGAATTTAATCGCAAAA     | 42 |
| CAGTATCACGCTGGCTGGCAAGTGTAGCAGAACGAAGACTGG  | 42 |
| GCACCGCCCTTCAGCCGCTTAATGCCTGCTCACATTGAA     | 42 |
| CATTCAGGTGGTTTTTGTGACGAGCACGTGACAAGAGAATGAC | 42 |
| CCTCTTCGCCAACGGCGGGAGCTAAACAACCCAGGCATAGTCA | 42 |
| CAAGGCGTCCAGTGGAAACGCTACGCCAGGAACGAAACCCCG  | 42 |
| GACGTTGTGAGCTAGAGGCCACCCAGTACTTAGCCAAGCGA   | 42 |
| AGCCAGGGAGCCGGCGTTGTAGCAATACGCCTGATAGAGAGT  | 42 |
| CACGACTCTGTGCTGAGTAGAAGAACAATACCAATGCGGAT   | 42 |
| CAATGTCGGGTACCCAGAACAAATATTACAAAAGAACTCAACA | 42 |
| TCGCCCTGCTACGTCATGGAAATACCTACGTAATGAGTTTCA  | 42 |
| CATCTGACTCTGAATTTTACATTGGAAGACTTAGTAGAT     | 42 |
| CCGGAATCATTGGGATCAATAACCTGTGGGGCCTTGAAACA   | 42 |
| ATCATATTGTTTTGTGAAAGCGTAAGAACCCTTTGGCCGGA   | 42 |
| CTCAACACAAATATGCTATTAGTCTTTAAACCGATAATCAGT  | 42 |
| GCCAAATGCAAATGCCATTAAAAATACCGATAGTGTAGCGC   | 42 |
| AAGAGAACTCCGGCAGAGGTGAGGCGGTATCAGCTTAGCGTT  | 42 |
| CAGACGAGAATTAACGCTGAGAGCCAGCAAAAAAGCCACC    | 42 |
| CGCCTGTATAGCGATTGCTGAACCTCAATAAAGGAAACCGCC  | 42 |
| AATATCCATCGTGGAGTTGGCAAATCAAACCTTCAAACCCACC | 42 |
| AATCGGCACATAAATAAATATCTTTAGGACGTTAGCAGGTC   | 42 |
| CCAAGTATTTAACAGTCAATAGATAATACTCATAGCCTCATT  | 42 |
| TTCATCGGAAGATGTACAAACAATCGAACCCAGTACGTTCCA  | 42 |
| AGATATATCGCGCAGTTATTAATTTAAAGCCCATGACTG     | 42 |
| TTTAGCGATAACGGAACAAGAAACCACACCCGCCACAGTGCC  | 42 |
| ATCAAGAGATGAATCTGATTATCAGATGAGGAGGTACCTATT  | 42 |
| CTGAATCACAGAAAGTTGGATTATACTTCTGAATA         | 36 |
| GTCCTTCCAGGCCT                              | 15 |
| GTAAGAAATTCATCAGTTGA                        | 21 |

|                                            |    |
|--------------------------------------------|----|
| CGGAACATTGGGGAAGAACGTGGACTATCAACATTAATG    | 42 |
| AGGACGTAGGGAGCAGGGTTGAGTGTTCGTGGGAAATATT   | 42 |
| ATTACCTCGTGGCGAATCGGCAAATCCGTTGGTGAACAGGA  | 42 |
| ATTGGGCTAGGGCGTTTGCCCCAGCAGGTGAGGGGTCAATCA | 42 |
| AATAAGGCACACCCCGCTGGCCCTGACAGCCAGCAAACAA   | 42 |
| ATTCATTTGGTTGCTTTTACCAGTAAAGCGCAGATCTA     | 42 |
| CTGGCTGAATCAGACGCGGGGAGAGCGGCGATCGCTAGCTG  | 42 |
| TGAAAGATAGACAGGGGAAACCTGTCGTAGGGGACCGGAGA  | 42 |
| GGCGCAGAATCAGTACTCACATTAATTGGTTTTCCCTGAGT  | 42 |
| GTCGAAAAATTAACAAGCATAAAGTGTAGCTTCTGATAAA   | 42 |
| ACAAAGTCACTTGCAAATTTATCCGCTGTGAATCCCTGTA   | 42 |
| AAACACTTAATATCGAGCTCGAATCGTTGTCAACTCAGAGC  | 42 |
| GAAGGCAAAACGCTGGTGTGTTACCTTAATCTATACAGGC   | 42 |
| AGGAAGTGAATGGCCCTCGTTGGTGCAGTGCCTCAATTC    | 42 |
| GCAACGGCAGTAATTCGGCTGACGCATTGAATATATTAGCTA | 42 |
| TCGTCACTCTGACCAATACCGACCGTGAAGCCTATCACCG   | 42 |
| GTCGCTGTTGAATGATTTTAGTTAATTGTATAAAGGAAGGT  | 42 |
| ACAATGAAAAATCCCAATCGCAAGACACCATATTAGCGCCA  | 42 |
| GAGGTGAATAAACTTAGGTTGGTTATTTGAGCGTTTATT    | 42 |
| CAAAGGCAGTGCCTCAAATCATAGTAAAGTAAGGTGGCA    | 42 |
| ATAATAACATCACCTAGCTTAGATTAAGGCTAATGATTACGC | 42 |
| CAGCGGATCTGGTCTTAAATTAATTTGAACAAATAACGG    | 42 |
| AATTTGCGTTATCTCAATATATGTGAGAGAAACCAGCCGAA  | 42 |
| AACGATCTAGAGCCATTTCAATTGAATTGAACGGGTAGCTAT | 42 |
| CAACGCTAGACTTATGAAACAAACATCAAGCCGTAGTTAAG  | 42 |
| CCCATGTCCCGAACGAGGCGAATTATTATAGCAAGTAATTG  | 42 |
| AGCCACCTTTGCGGATTCGCCTGATTGCAGAACGCTAGACGG | 42 |
| CGCCACCCATATTATACAGTAACAGATTTTGAACAGCCTT   | 42 |
| AGCCCGGCTGATTTAAAGAAATGCGTGCTACAAAATAAGA   | 42 |
| CGAGAGGTTGATACCTCAAGAGAAGGATTAGGATT        | 36 |
| AGTACCAGGCGGATAAGTGCCGT                    | 23 |
| GATTAGGAATACCA                             | 15 |
| CATTCAACTAATGCAGATACATAACAATCAGCTCATTTT    | 39 |
| CGAGGCAATTCGCACCCGTGGATTCTCTCCAGTAATCGGA   | 42 |
| AGACGACATAAGCAATGGGATAGGTCACCTTATAAGGAAAGC | 42 |
| GAAGTTTCCCGTTTGCATCTGCCAGTTGAAAATAAAGGAG   | 42 |
| ATAGCGTGATGAACGGAAGATCGCACTCGAGATTCTGCGCG  | 42 |
| TCCCCCTATCAGGGCCGAAACCAGGCGAGACGGCAGGGCG   | 42 |
| CATAAATAATGCCGAACCTGTTGGGAAGGTTTGGCGCTTCC  | 42 |
| GAAGCAAATCACACGCCAGCTGGCGAAGCCAGCTGATAAA   | 42 |
| AAAGACTAGTAAATGGGTAACGCCAGGCGTTGCGAGAAGTG  | 42 |
| ACCAGACAGAACCACGGCCAGTGCCAAAAGCCTGCTGTCCA  | 42 |



|                                              |    |
|----------------------------------------------|----|
| ACCTTTATGCGGGATTCTTCTAAGTGGTTCACAATATTAGTA   | 42 |
| GGCTTAGTAATCGCCTTAGTGCTGAATAATCATGATCGGCC    | 42 |
| TGTTTTAAGAATTAATAACCCCGCTCCGATAAACATTGCA     | 42 |
| TTCCATAAGTAGTACTCTATGATACCGATAATGAGACGCTCA   | 42 |
| TTAGTTTATTTGGGTCGTCGGTGGGCACTCACATAACCCAGTC  | 42 |
| AGCAAAACTTGAGCCATAATTACTAGAATGATAAAAGAGATA   | 42 |
| AACGTCAGACGGAACAATCTTACCACATCTCCACAGAC       | 42 |
| AGCGACAAGGGCGTTAATTGAGAATCGAAGAACGAACTGAT    | 42 |
| GTTTTCAATCAATTAGGCAGAGGCATTATACTAACCCCA      | 42 |
| TGCCATCAAAGAAATACCGACAAAAGGTCTGAGAGAACC      | 42 |
| ACCGGAATAGCAAAAAACAACATGTTCAACGCTGATGAAAA    | 42 |
| ACCCTCAAAAAGAACAAATAGATAAGTCCCTCCCTAACCCCTCA | 42 |
| ACCAGAGACCAGAAATTTACGAGCATGTTGAATAAAGGAAT    | 42 |
| AGACGATAAGCCCTCCTTATCATTCCAAACCTTTTAACA      | 42 |
| AAAGCCAATAAGAGCATCGAGAACAAGCAAGAAAAGGATTA    | 42 |
| GTAAGCGATATCAGCATTACCGCGCCCAATTTCAATATAAA    | 42 |
| GTAATAAACTGAATATCCGGTATTCTATTTGAATAGTAACA    | 42 |
| CGTATAAAGAATAACGACTTGCGGGAGGCCTTTTAAGCGGAA   | 42 |
| AITCTGATTTGTTCTATTTGCACCCAAGATTTTTTCATCA     | 42 |
| AGCGGGTTTTGCTC                               | 15 |
|                                              |    |
| object-label:                                |    |
| Cy5-TTCCTACCATATCAAAATTTTTCG                 | 25 |

**Supplementary Table 3:** list of oligonucleotide-sequences of the 6-helix-bundle.

| sequence                                    | length | defect-variant |
|---------------------------------------------|--------|----------------|
| ATCATATTGGTTTGTGAAAGCGTAAGAACCGCTTTGGCCGGA  | 42     | 3              |
| CTCAACACAAATATGCTATTAGTCTTTAAACCGATAATCAGT  | 42     | 3              |
| GCCAAACATGCAAATGCCATTAATAATACCGATAGTGTAGCGC | 42     | 3              |
| TCGCCCTGCTACGTATGGAATACCTACGTAATGAGTTTCA    | 42     | 5              |
| CATCTGTACTCTGAATATTTACATTGGAAGACTTAGTAGAT   | 42     | 5              |
| AGCCAGGGAGCCGGCTTTGTAGCAATACGCCTGATAGAGGT   | 42     | 8              |
| CACGACTCTGTGTCTGAGTAGAAGAACATACCAATGCGGAT   | 42     | 8              |
| CAATGTCGGGTACCCAGAACAAATATTACAAAAGAACTCAACA | 42     | 8              |
| CAAGGCGTCCAGTCGAACGGTACGCCAGGAAGTAAAGCCCG   | 42     | 10             |
| GACGTTGTGAGCTAGAGGCCACCGAGTACTTAGCCAAAGCGA  | 42     | 10             |
| AAGACAAGAATCAACATCGCCACGCATATGCGCGGAGAAA    | 42     | 15             |
| TTGTCACTCGGCATAAACAGCTTGATACCGAACGATATGTAA  | 42     | 15             |
| ACATATATTTTCATAATTGTATCGGTTTCAGTATTACTACCT  | 42     | 15             |
| AGTATGTCGGCTCACGTTGAAAATCTCCAGCAAAGAAGGT    | 42     | 15             |
| AATACCCGAGCCACTAGAAAGGAACAACATATCAAGATCCT   | 42     | 15             |
| ATAAAGCAGCTTAAGACCCCCAGCGATTTCAAACGTATAG    | 42     | 20             |
| AAGGCAAAATATGCAAAACGAAAGAGGCCGCCAGCGACGGAG  | 42     | 20             |
| TACTAATTAACAGTAAACGGGTAAATACATTTTGTAAACAG   | 42     | 20             |
| TATTTTCGACCATTGGCTTTGAGGACTACAGATTCAATCATT  | 42     | 20             |
| AAATATCCAATGACAGGGAGTTAAAGGTACGTGGTGACCTA   | 42     | 20             |
| GAACCCCTCAGCTAGCACCATTACCAGTGAATTTTGTAGT    | 42     | 30             |
| AATATTTAGGCTTGAACCATCGATAGCAGAGGGAGGCCAACG  | 42     | 30             |
| AGCCCTACAACAACGTTTGCCTTTAGCGGTTTACCTAACAAAC | 42     | 30             |
| GCAGAAGATTTCTTTTTTCGGTCATAGCCGGAATAACAGTAAT | 42     | 30             |
| CCTGCAAAGCCTTTAATCAAATCACCGACATAAATCTGTGC   | 42     | 30             |
| TCTAAAGTTTTTTCCCTCAGAGCCGCCAACTCCTCAGAACG   | 42     | 30             |
| ATCAATAGTGAGAACCCCTCAGAGCCGCGCAATGAAAAAT    | 42     | 30             |
| AATGTTTCAAATAATCATAAGGAACCAATCCTGCTCACTG    | 42     | 30             |
| AATTTTCGGAAGCCCTGCTCCATGTTAAAAGAGTGGGTGCC   | 42     | 30             |
| ATACTTATTGCTCAGATTTGTATCATCTTCTTTGTCCACAC   | 42     | 30             |
| TTTTAACTATAAAGCGCAAAGACACCACCCTTATTGCTTTC   | 42     | 40             |
| CAATAGTCGACAATCGTAGAAAATACATGAACCAGAAGGCTC  | 42     | 40             |
| TGAAAACCTTATCAACTGGCATGATTAAGCCCTGAGATTGCGA | 42     | 40             |
| TCTGTAACATCCTAGGAAACCGAGGAAACCACCAGACAGTTT  | 42     | 40             |
| TTTTTATACGGTCATCGGTTTTAATTCTGCAATGCAGTCAC   | 42     | 40             |
| TCACGCATCCGCGAAAACCTCAAACAGGTAACGCAACAGGAGA | 42     | 40             |
| ATAACATACAACGGCTTTTGATAAGAGGATTATGATCATGCG  | 42     | 40             |
| TTGCTGGCATCTTTTTGCTGAATATAATTAAGCCCTTATGA   | 42     | 40             |
| ACAGGAACCAACCTAACTAAAGTACGGTTAAATCATTACGC   | 42     | 40             |
| ATCGCTTTCCATTGATCCCAATTCTGGTGGCAGCCCTGC     | 42     | 40             |
| CCCGCTTATAAGTGATTCAAAGGGTGAAGAGGCCAACTT     | 42     | 50             |

|                                            |    |    |
|--------------------------------------------|----|----|
| TAATGAGTAAAACGTCATATATTTTAAAGAGCTTCGGAACGA | 42 | 50 |
| AACATACGTGGATGGAAGCCTTATTCCAGGATTAATGT     | 42 | 50 |
| CTGTTTCTAAGTGTGTGTACCAAAAACATTTTGC GCGAA   | 42 | 50 |
| GATCCCCCGCCAAGCAAATAAGCAAGCTGTAGTACACTA    | 42 | 50 |
| GGCTTAAGGAGTGAGCATTACATCCAAGTCTGGACCACTAC  | 42 | 50 |
| TCTCGAAAGCAACGCGGAGCTGAAAAGCGAACGTTTCATG   | 42 | 50 |
| AATTAAGCGTTATATTATTCAATAAAGTTAGCAATGCGGGA  | 42 | 50 |
| ACTTTTGTAGGGCACATCAACCGATTGCACCGTATATCG    | 42 | 50 |
| ATGCTGATGTAATTAGAAAATTCATATGTCAGACTTGCGCCG | 42 | 50 |

**Supplementary Table 4:** list of omitted oligonucleotides for the pseudo-defect-variants of the 6-helix-bundle.

| Sequence                                          | Length |
|---------------------------------------------------|--------|
| AGGGCGAAAAACCGTCTATCAGGGCG                        | 26     |
| ACGTCAAAAATCAAACCCATATCTAAAATATCTTTAATGGCCTGTT    | 49     |
| TATTAAGGTGCCTTGCTGACACTAACAACTAATAATTTATTATACA    | 49     |
| CAGTTTGCAGAACCTGAAAAAGCCGTCATAGATTTTTTCATAAAGCC   | 49     |
| AGATAGGCGATTTAACGCTGATTGAGGATTTAGAAAGACAAAGGGCTTA | 49     |
| ATAAATCAAGCCGGAACACCGACTTACAACAATGCTGATGATTTAA    | 49     |
| CCGAAATAAGGAAGAGAGGTGCTCGTATTAAATCCGTTATATAATTTAG | 49     |
| AAATCCTGGAGCGGACCACCAGAACGTATTAAATTTAACCTGAGCCAG  | 49     |
| CTGGTTTGAAGTGGCCATTATTGAGTAACATTATAGGTCTAAAGTAC   | 49     |
| AGTTGCACGCGTAAAACCTGATGCGGAACAAAGAAATAGTGAGTAATTC | 49     |
| TTCACCGCGCTTAGCTATTAAGGAGCGGAATTATTAAGACCAATAAA   | 49     |
| ACGGGCAGGCGCGTCACAGACATTCCTGATTATCAAAAACATAATGCAG | 49     |
| GTTTTTCGACGAGCTGAAAGCGCAATTCATCAATAAATTTCTCAACAA  | 49     |
| TGCGTATTTCTCGAGAGATAGATTGTTGGATTATGTAATACAAGAA    | 49     |
| AACGCGCGGAGCTAAAAAGGGGAATAATGGAAGGGGTGAGTGCCTAATT | 49     |
| AGCTGCATAAAGGGACCAGTCTACCATATCAAAAACAGTACAACCAAT  | 49     |
| AGTCGGCGGTACGATTATTTACGTAAACAGAAAGATTACCTTTCCCT   | 49     |
| TGCGCTCAGTGTTCAGCTCAAATTCGCTAGATTTTACATTCGGGTAT   | 49     |
| GCTAACTGCCACCGCATGGAATAACGTCAGATGAAACATCAACACTCAT | 49     |
| CCTGGGGTCCATCACATTGCATAACAGTACCTTTTCAAAGACCGTTTT  | 49     |
| CCGGAAGTGTAGCACAGAACAGAGAAACAATAACGTATTCATGAATCAT | 49     |
| CAATCCAGTAATAATCGGCCCTGATTGCTTTGAATACCAATGAAGAAC  | 49     |
| TGTGAAAAGCGGTTGATAATCTTCTTAACGTTTGCCATCTTT        | 42     |
| CATGGTCCCCAAAAACTAGCATACTGCGGAATCGTTGCAAAGACAATG  | 49     |
| TACCGAGATAAGCAATCGATGATTGATTGAATCCAACCAACACGCA    | 49     |
| TAAAGACAAACGTTGAGTCTGATGCTTTAAACAGTCGTTACGGTCGCT  | 49     |
| ACGTGGTATTCGAGGCTATCAGGAGAATGACCATGAGCAACGTTAAAG  | 49     |
| TGAGTAAATCAGCTATTTTTAAATCAGGCTTTAAGGAATTATCGTCA   | 49     |
| CTGACCTATAGAAAATTAATGATATATAGTCAGAAATGCAGAAGACAGC | 49     |
| CATAAATATTCGCGTTCAACCGGATTGCATCAAAATAGGAATAGCAACG | 49     |
| TGAATCGAGCCAGCCAATCAGAGGAAGCCGAAAAAAGATTGAGGACT   | 49     |
| TGGGCACAATGTGAGTGAGAAAATATCGCGTTTTAGAACAACGAGGAAG | 49     |
| CATCTGTGTCGGATTGTAGGCTTCAAAGCGAACCCGTTAATGTAATAAT | 49     |
| ATACCGAAACGGGAAATGCAAAGCAAACCTCAACGACGTTGCGAAGGC  | 49     |
| TCGCCCTGGATAGGTTTAGAAGATTAGAGAGTACCCTGGCTCAAAGAGG | 49     |
| CCGCTCATGGGCGTTCAACGGCTCCTTTTGATAATACCTTAAACAC    | 49     |
| CAATGTCATCGCTTTTTCGTTTTTTCGCGATGGCTCAACTTCAGCGAT  | 49     |
| GCTGAATACGACAGAACATTATTAATTGCTGAATATGGGCTTAACAAAG | 49     |
| CACGACTAGATCGCAGCTAAAGTAGCTCAACATGTACACCAGGTATCAT | 49     |
| AAGTGGTCCGGCACAATAAATGCAACTAAAGTATAAGGCTTGTGAA    | 49     |
| AGCCAGGGGAAACCAAGAAATGGAAGTTTCATTCAAAGCTCCATGTT   | 49     |

|                                                  |    |
|--------------------------------------------------|----|
| GTGCCAATCGCCATCAATAAACAGTTGATTCCCAATCATTACAGCGCA | 49 |
| GACGTTGTGTGGGAATAGTAAACGAGTAGATTTAATCTTGAAGGGAAC | 49 |
| GATGTGCTGCAAGGCGATTAAGTTGGGTAACGCCAGG            | 37 |
| ATGGCCCACTACGTGAACCATCACCC                       | 26 |
| CGGGCCTCTTCGCTATTACGCCAGCTGGCGAAAGGGG            | 37 |
| ATCAATATCTGGTCAGTTGGCAAATC                       | 26 |
| ATATCAAGTTTTTCCCTTTTAAAAGAACTGGCAT               | 35 |
| CATCACCGTAAAGCGCAATAGACTCCTTATTACGC              | 35 |
| CAGCAAACCTAAAGGAGAGCAATAGCAAACGTAGAA             | 35 |
| CAGTGCCGAGCTTGATTGAGTACATAAAGGTGGCA              | 35 |
| CAGTATTCGAACGTTCCAGAGAAAAGAAACGCAAAG             | 35 |
| ATAAAACGGAAAGAGGGGTAGGAATAAGTTTATT               | 35 |
| CGAACGAGCGCTAGTGAACACAATCAATAGAAAAT              | 35 |
| AAACATCTAGCGGTGCATTAGGTTTACCAGCGCCA              | 35 |
| ATGCGCGCCACCACATAACATAAGGGCGACATTCA              | 35 |
| TTGAATGATCGCCATAGCAGGAGGGAGGGAAGGT               | 35 |
| TACGTGGACTATGGTGTAAAGACGGAAATATTTC               | 35 |
| TCTGACCACGTATATCCAAATGTGAATTATCACCG              | 35 |
| GGCCAACTTAGAATCAGCCATCTTGAGCCATTGG               | 35 |
| CAGTAATAACAGGAATTTGCCAGCCAGCAAATCA               | 35 |
| CAGATTCATTTAGCGAGCGTCACCATTACCATTA               | 35 |
| GAAATGGCCAGAATCCTGAATCGGAAACGTCACCA              | 35 |
| CATTTTGTATAATTGCACCCCATCGATAGCAGCA               | 35 |
| AAACGCTAGTAAAAATCAAGCAGTAGCGACAGAA               | 35 |
| CGCCAGCCGCAATGCGGGAGTGCCTTTAGCGTCA               | 35 |
| TAATATCATACTCTTTTAGCGCGCTTTTCATCG                | 35 |
| TCAAACATACATCAGTATTCTCGGTCATAGCCCC               | 35 |
| TCATATGTACCCTAGTTTAGACTGGATAAGGGGTCTTGATA        | 42 |
| ATCGTAAACAGGACAGCTTGCAAATCACCGGAA                | 35 |
| CAAGAGAAATTTCCCTTTAACACCACCGGAACCG               | 35 |
| TGCCTGAAATATTAAAAAACAGAGCCGCCACCC                | 35 |
| CTACAAATAAATTTTTCACCGCCACCCTCAGAG                | 35 |
| GGGTAGCTCATTTAAGGAATCCTCAGAGCCGCCA               | 35 |
| CTGATAACGCCATCGAGAATACACCACCAGAGCCG              | 35 |
| TATGATATCTGGCCTTCAACCATTGACAGGAGGT               | 35 |
| AGACAGTTTTTCATCTATGGGAGGTCAGACGATTGG             | 35 |
| CAAAAGGGCGAGTACGTTAGTATCACAAACAAT                | 35 |
| AGTAATGTCTCCGTAAGTTTTCATTAAGCCAGAA               | 35 |
| ATATTTTGATTGACCATAGTTCGCAGTCTCTGAAT              | 35 |
| AAAAATTCACGTTTAGCATTTCAGTAAGCGTCA                | 35 |
| CCTTTATCATCGTACAGTACACTTTTGATGATACA              | 35 |
| GTAATACAGTTTGACGTAACAACCTGGTAATAAGTT             | 35 |

|                                           |    |
|-------------------------------------------|----|
| TACCAAATATCGGCGCCCAATGGTCAGTGCCTTGA       | 35 |
| AGCATAAACTCCAGCCTCATTTGCCCGTATAAACA       | 35 |
| AATTAAGCCGCTTCCGCCACCCCCCTGCCTATTT        | 35 |
| GGCAAGGAGGCAAAACAGAACCTATTATTCTGAAAC      | 35 |
| TACATCTCAGGCTGAGGTTTTATTAAGAGGCTGA        | 35 |
| TTCTACTAAGGGCGTAGGTGTCAAGAGA              | 28 |
| AGCTATATTTTCATTTGGGGCGGAGCTGAAAAGGTG      | 37 |
| CATTAGATACATTTGCAAATGGTCAATAACCTGTTT      | 37 |
| GTTTGAAATACCGACCGTGTGATAAATAAGGCGTTAA     | 37 |
| CTTCATCAAGAGTAGTTTGACGCATCAA              | 28 |
| CAGACCAGGCGCATAGGCTGGCTGAC                | 26 |
| ATAAGAATAAACACCGGAATCATAATTACTAGAAAAA     | 37 |
| TAGTATCACCGAAGGGGTGGAACTGGACTCCA          | 35 |
| AATTCITTTGAAATACTAAATGAACAAGAGTCCAC       | 35 |
| AACGCTCAATAATAGAGCCCCGTTGAGTGTGTTC        | 35 |
| ATTGAGACACAAGAACGGGAAAAAGAATAGCCCG        | 35 |
| CAACGCCGTAATAGGCGAGACGGCAAAATCCCTT        | 35 |
| GCAGAGAAAAGTCAAGCGAAAGTTTGATGGTGGTT       | 35 |
| TAATAAGAATTAACGGCGCTGGCCCCAGCAGGCGA       | 35 |
| CGACAAAGGGAAGCCACGCTGGCAAGCGTCCACG        | 35 |
| TGTCCAGAGAGAGAACCCGCCCTGGCCCTGAGAG        | 35 |
| CAACATGAATGAAAGCTACAGACAGCTGATTGCC        | 35 |
| AACGCGCATTTTTTGTCTTTTTTCCACAGTGAG         | 35 |
| TAGATAAATCCAAACGTGCTTGGGCGCCAGGGTG        | 35 |
| AAATAATAATAAACAGAGCGGGGAGAGCGGTT          | 35 |
| TACGAGCGAGCCTAGGCCGATTTAATGAATCGGCC       | 35 |
| CAATAATACGCTAAACAGGAAAAACCTGTCTGCC        | 35 |
| TATCATTATTTATCCTGAGAACTGCCCGCTTCC         | 35 |
| TAAACCAGCTATTTTCAGTGAGCACATTAATTGCGT      | 35 |
| CGAGAACAGCCTTAGAGTCTGTGCTAATGAGTGA        | 35 |
| TATTTCCCGACTTAAACCGTCATAAAGGTAAAG         | 35 |
| TACCGCGGAGCGTTTGATTACACAACATACGAG         | 35 |
| AATCAGATATAGAGAATAGTAAAGTTACAAAATCGCAAGCA | 42 |
| CCGATAGGGTGAATAGAAAAGATAGCTGTTTCCTG       | 35 |
| ACAACAAGGTTTATAGATTGTCTCGAATTCGTAAT       | 35 |
| TAACCGAAAAGGAGAAATTGTGGAGGATCCCCGGG       | 35 |
| GAGGCTTATCTCCATGTTAAAGCTTGTACCTCGA        | 35 |
| GCCGCTTAATAATTTTGTAAACAGGGCTTAAGCT        | 35 |
| CCCTCAGACAACCTATTAACCACCTGTTGGTGTA        | 35 |
| ATCGGAAGCGGAGTAAAAATACATTTCTCCGAACT       | 35 |
| GCTACAGAAAACACTTCTGTGCTGACGCATTTCA        | 35 |
| AAAGACTTTTTCTGAACATTAGAATATAGGGGCT        | 35 |

|                                                    |    |
|----------------------------------------------------|----|
| TTTCCATTTCCAGAACACCCAAGCAACTCGTCGG                 | 35 |
| ACGTAATCGATCTAGGGAACACAGTGGCCCTGC                  | 35 |
| ACCAACCCAGCCCTCGTAATGGGAGTACTCTATG                 | 35 |
| CAAAAGAACGCCTGGGTGTAGTAATCTATTACGC                 | 35 |
| TCATCTTTCGTACACCGTGCCTCCGCAAAATAACC                | 35 |
| TATACCACATGTACGGGGACGTGTCAACCTTATGA                | 35 |
| TACAACGATAGCAACTCAGGATAAGTGTCTTAGT                 | 35 |
| CGCCTGACCACCACCCAGCTTTGTGAATTCATGCG                | 35 |
| ATCCGCGTCAGAACTGGTCCCGTGGATGTTCTTCT                | 35 |
| ACTTAGCCACCCTGCGCCATGCTTTCTCAGGAGA                 | 35 |
| GACGGTCTACTCAGGCGCACTAAAACGACGGCCA                 | 35 |
| CGAACTGCCCGGAAATCGGTGGTTTTCCAGTCAC                 | 35 |
| ACCAACTTTGAAAGAGGACAGATGAACGGTGTGA                 | 33 |
| TAAGAAAAGTAAGCAGATAGCCGAACAAGTTACCAG               | 37 |
| TAAGTGCCGTCGAGAGGGTTGATATAAGTATAG                  | 33 |
| AAGGAAACCGAGGAAACGCAATAATAACGGAATACCC              | 37 |
| GATTAAGCTATCTTATATGCGTCTTCTGACCTAAATTAGGAGACCTCAA  | 49 |
| AGTATGTGAAACAAACCAGTAAATATATTTAGTTAGATTAGCTAAAG    | 49 |
| AATACATTAAGCCCAACAGTAGAACGCGAGAAAACAATACATGAGCCAG  | 49 |
| ACATATAGATAAACCATCGCCCAAAATCCAATCGCAGTATTAGCCTGCAA | 49 |
| ACACCACATTGAGCAACATGTAACATATATGAAATCGACAAGGCGGT    | 49 |
| TTGTACCCTGAACCATTTCCCGGCTTAGGTTGGTTGCCCGCAGAAG     | 49 |
| TCATATGACGGGAGAGAATAGAGAGACTACCTTTTAAAAGAAAATAC    | 49 |
| AAGACAAAAAACAAGGTAAAATTATCAAAATCATCTTTAGCCCTA      | 49 |
| ACCGATTCTTTACACGACGAGCTGAGAAGAGTACCACCAGGTCTTTA    | 49 |
| AAATATTCGTCAAATTCAGCTAGCGATAGCTTAGATCATATAATTTT    | 49 |
| ATTAAAGAAGAAACCTGTTACCTTAGAATCCTTGGATGATGGTAAGAA   | 49 |
| TCACCGAATTATTTGTCCTGACGTGCGTATTAATTAATCCTGAACCT    | 49 |
| GAATTAGAGTTACAATCCATAATAACCTTGCTTCTACTTCTACATTCT   | 49 |
| CCAGTAGCTTTCCAATGTAGATAAATCAATATATTAGAACACACGAC    | 49 |
| GCAAGGCCTTACCACGGCTGTCTTTTAAATGGAATTATTGACATTGG    | 49 |
| ATGAAACAGCTACACCAAGAATAACAATTCATTATAAAGAATCGTCT    | 49 |
| CCGTAATATTAGTTAGTACCGGAAAACAAAATTAATCAGGTTATACCTA  | 49 |
| TCAAGTTGTTTTGAAAGCAAGAGATGATGAAACAATATACAGACAGGAA  | 49 |
| GACTGTAGAACCTCATCGTAGTTCAATTACCTGAGACATCGGATATTAC  | 49 |
| GCATTTTAAGAACGCCAATAGCGCAGAGGCGAATGATTGCTTGCTGG    | 49 |
| TTATTAGACAAGGCTTATCCGTTGCCTGTTGTTATCCGCTCA         | 42 |
| TCATAATCTTTCGATTGCGCCAGAAGTTTTGCCAGGCGTCCAATGTCAA  | 49 |
| CCAGAGCTTGATCCCATCGCATAGCGAGAGGCTTTCATAAAAACGGTA   | 49 |
| OCTCCTGGCTCCATATATTCCAGACGACGATAAACCTCAAGAGCAAA    | 49 |
| TCAGAACGTTGAAAGCAGGGAATCATACACCTTCAGAAAAGGTCAT     | 49 |
| CCACCACTGCGAATTTGCGGGACGAGGCATAGTAAAATCAAGAGAGAT   | 49 |

|                                                   |    |
|---------------------------------------------------|----|
| CCAGAACGAAAGGACAGCGAATACATAACGCCAAACCCTGACCCGGAGA | 49 |
| CCGCCAGAGTTTCACGAGGGTACCACATTCAACTAGCAAAGCGTTCTAG | 49 |
| TGAGGCATTTTGCTAGGCTTTCATCAGTTGAGATTAGATTAACCATCAA | 49 |
| CCTTGATAAATGAATTTTCATATTATTACAGGTAGGACTTCAAGGCCGG | 49 |
| AAATCCTGTCGTCCTAAACGGAAAACGAACTAACGATTCGAGAAAGATT | 49 |
| TGGAAAGAGCGTAAGCCACTAGGAAGAAAACTAAGACCGGATGCCTG   | 49 |
| TTACCGTCCACAGATAAAACGATTATACCAGTCAGAGGTCAGCCCTCAT | 49 |
| TACATGGAACACAATACTTGCATTTAAGAATTTAATTCAAGGAT      | 49 |
| GGAGTGTCTGAGTTGACCCCTAATCATTGTGAATGAGGTCAGGAGAAG  | 49 |
| TTAACGGAGGAACCAGCGCGAGAGATGGTTAATTTAGAGCTGACCCT   | 49 |
| GTAACAGTTCAGGGGAGATTTAACGAGTAGTAAATTAATGCTTCGGTTG | 49 |
| GTTAATGCTCAGAGTAAATTGTGCCCTGACGAGAATTTAAATGCCTCAG | 49 |
| CGGAACCGCCACCCACCTGCTGCTCATTGAGTGAACGGTGTCTTAGCAA | 49 |
| ATGAAAGAGTACCGCGGAACGCCAAATCAACGTAACATATAATCATA   | 49 |
| GACTCCTATACCGAATCATAAGAACCGGATTTCTGCGGTAGCAT      | 49 |
| AGGATTAGGATTAGCGGGTTTTGCTCAGTACCAGGCGGA           | 40 |
|                                                   |    |
| object-label:                                     |    |
| Cy5-TTAACAGTTGAAAGGAATTGAGGAAGGT                  | 28 |

**Supplementary Table 5:** list of oligonucleotide-sequences of the 8-helix bundle.



| sequence                                           | length | defect variant |
|----------------------------------------------------|--------|----------------|
| AGATAGCGGATTTAACGCTGATTGAGGATTTAGAAAGACAAGGGCTTA   | 49     | 3              |
| CCGAAATAAGGAAGAGAGGTGCTCGTATTAATCCGTATATAATTTAG    | 49     | 3              |
| CTGGTTTGCAAGTGGCCATTATTTGAGTAACATTATAGGTCTAAAGTAC  | 49     | 3              |
| TACCGAGATAAGCAATCGATGATTGATGAATCCAACCAACACGCA      | 49     | 5              |
| ACGTGGTATTCGCAGGCTATCACGAGAATGACCATGAGCAACGTTAAAG  | 49     | 5              |
| GACTCCTATCACCGAATCATAAAGAACCGGATATTTCTGCGGTAGCAT   | 49     | 8              |
| TATTAAGGTTGCCCTGCTGACACTAACAACTAATAATTCATTATACA    | 49     | 8              |
| CCGGAAGTGTAGCACAGAACAGAGAAACAATAACGTATTCATGAATCAT  | 49     | 8              |
| GTAAACAGTTCAGGGGAGATTAAACGAGTAGTAAATTAATGCTTCGGTTG | 49     | 10             |
| CGGAACCGCCACCCACCTGCTGCTCATTGAGTGAACGGTGTCTTAGCAA  | 49     | 10             |
| GACTGTAGAACCTCATCGTAGTTCAATTACCTGAGACATCGGATATAC   | 49     | 15             |
| CCAGAGCTTGTATCCCATCGCATAGCGAGAGGCTTTCATAAAACGGTA   | 49     | 15             |
| TCAGAAGCTTGAAGCAGGGAATCATAACCCCTTCAGAAAAGGTCAT     | 49     | 15             |
| CCAGAACGAAAGGACAGCGAATACATAACGCCAAACCTGACCCGGAGA   | 49     | 15             |
| GGAGTGTCTGAGTTGACCCCTAATCATTGTAATGAGGTCAGGAGAAG    | 49     | 15             |
| TTACCGTCCACAGATAAAACGATTATACCAGTCAGAGGTCAGCCCTCAT  | 49     | 20             |
| ATTAAAGAGAAACCTGTTACCTTAGAATCCTGGATGATGGTAAGAA     | 49     | 20             |
| GAATTAGAGTTACAATCCATAATAACCTTGCTTCTACTTCTACATTCT   | 49     | 20             |
| GCAAGGCCTTACCACGGCTGCTTTTTTAATGGAATTATTGACATTGG    | 49     | 20             |
| CCGTAATATTAGTTAGTACCAGGAAACAAAATTAATCAGGTATACCTA   | 49     | 20             |
| CCGTTTCATGGGCGTTCAACGGCTCCTTTTGATAATACCTTAAACAC    | 49     | 30             |
| GCTGAATACGACAGAACATTATTAATTGCTGAATGGGCTTAAACAAAG   | 49     | 30             |
| AAGTGGTCCGGCACAATAAATGCAACTAAAGTATAAGGCTTGTGAA     | 49     | 30             |
| GTGCCAATCGCCATCAATAAACAGTTGATCCCAATCATTACAGGCGCA   | 49     | 30             |
| AATACATTAGCCCAACAGTAGAACGCGAGAAAACAATACATGAGCCAG   | 49     | 30             |
| ACACCACATTGAGCAACATGTAACATATGTAATTCGACAAAGGCGGT    | 49     | 30             |
| TCATATGACGGGAGAGAATATGAGAGACTACCTTTTTAAAGAAAATAC   | 49     | 30             |
| ACCGATTCCCTTACACGACGAGCTGAGAAGAGTACCACCAGGTCCTTA   | 49     | 30             |
| TGAGGCATTTGCTAGGCTTTCATCAGTTGAGATTAGATTAACCATCAA   | 49     | 30             |
| AAATCCTGTCGCTTAAACGGAAAACGAACCTAACGATTGAGAAAGATT   | 49     | 30             |
| AAATCCTGGAGCGGACCACCAGAACGTTAATTTAACCTGAGCCAG      | 49     | 40             |
| AGTTGCACGCGTAAACTGATGCGGAACAAGAAAATAGTGAGTAATTC    | 49     | 40             |
| ACGGGCAGGCGCTCACAGACATTCTGATTATCAAAAACATAATGCAG    | 49     | 40             |
| TGCGTATTTCCGAGAGATAGATTGTTGGATTATGTAATACAAGAA      | 49     | 40             |
| AGCTGCATAAAGGACCAGTCTACCATATCAAAAACAGTACAACCAAT    | 49     | 40             |
| TGCGCTCAGTGTTTACGCTCAAATGCGTAGATTTTACATTCGGGTAT    | 49     | 40             |
| CCTGGGTCCATCACATTGCATAACAGTACCTTTTCAAAGACCGTTTT    | 49     | 40             |
| CATAAATATCGCGTTCAACCGGATTGCATCAAAATAGGAATAGCAACG   | 49     | 40             |
| TGGGCACAATGTGAGTGAGAAAATATCGCGTTTTAGAACAAACGAGGAAG | 49     | 40             |
| ATACCGAAAACGGGAAATGCAAGCAAACTCCAACGACGTTGCGAAGGC   | 49     | 40             |
| ACGTCAAAAATCAAACCTCATATCTAAAATATCTTTAATGCGCTGTT    | 49     | 50             |

|                                                   |    |    |
|---------------------------------------------------|----|----|
| CAATTCAGTAATAATCGGCCCTGATTGCTTTGAATACCAATGAAGAAC  | 49 | 50 |
| GACGTTGTGTTGGGAATAGTAAACGAGTAGATTTAATCTTGAAGGGAAC | 49 | 50 |
| TCATAATCTTTCGATTGCGCCAGAAGTTTGCCAGGCGTCCAATGTCAA  | 49 | 50 |
| GATTAAGCTATCTTATATGCGTCTTCTGACCTAAATTAGGAGACCTCAA | 49 | 50 |
| CAGTTTGCGGAACCTGAAAAAGCCGTCAATAGATTTTTTCATAAAGCC  | 49 | 50 |
| CATGGTCCCCAAAACTAGCATACTGCGGAATCGTTGCAAAGACAATG   | 49 | 50 |
| TAAAGACAAACGTTGAGTCTGATGCTTTAAACAGTCGTTTACGGTCGCT | 49 | 50 |
| TGAGTAAATCAGCTATTTTAAATCAGGCTTTAAGGAATTATCGTCA    | 49 | 50 |
| ATAAATCAAGCCGGAACACCGACTTTACAAACAATGCTGATGTATTAA  | 49 | 50 |

**Supplementary Table 6:** list of omitted oligonucleotides for the pseudo-defect-variants of the 8-helix-bundle.

| Sequence                                   | Length |
|--------------------------------------------|--------|
| AGAAGTGC GGTTAGTCAGGACGCACCACCAGAGCGCCTTTA | 42     |
| TTGAATGGCTATTAGTCTTTAATGCGCGAACTGATAG      | 37     |
| AAAGAACGTGGACTCCAACGTCAAAGGGCGAAAAACCGTC   | 40     |
| AAGAGTCTTTGGGGTCGAGGTAACTCCTCCATG          | 35     |
| AGTGTGAGCACTAAATCGGAAGAGGCACGAGGGG         | 35     |
| GAATAGCAGGGAGCCCCGATAAGGCACTAAGGGA         | 35     |
| AAAATCCTTGACGGGAAAGCAAATACCTTTGAA          | 35     |
| GATGGTGCCTGGCGAGAAAGGGGAAGTTCGGTGTA        | 35     |
| CAGCAGGAAAGCGAAAGGAGGGACTAAAGGCTGG         | 35     |
| GCGGTCTAGGGCGCTGGCAACAACGGCGAGTAAT         | 35     |
| GCCCTGAGGTACGCTGCGCGACAGCATGATATC          | 35     |
| CTGATTGCACACCCGCCGCCGTACCCGTAACA           | 35     |
| CACCAGTGCCGCTACAGGGCGTAAGGCGTGAATA         | 35     |
| CGCCAGGTGGTTGCTTTGACGTCGCTGAGAGAAAC        | 35     |
| AGAGGCGATAACGTGCTTTCCACGCATATAAATTG        | 35     |
| TGAATCGAATCAGAGCGGGAGCAATGACTAATTC         | 35     |
| CTGTCGTGGAGGCCGATTAATGATACCTGAATTA         | 35     |
| CCCGCTTTAGACAGGAACGGTAGGTGAAAAGAACT        | 35     |
| TTGAGTAAATCAGTGAGGCCAAAAGGACGCCGCC         | 35     |
| AACGTTAAAAGAGTCTGTCCAAATCCTCGTTGAGG        | 35     |
| TCGTATTAATTAACCGTTGTATAATAATGGCCTTG        | 35     |
| CTTTACATTCTTTGATTAGTAAACAACTATAAATC        | 35     |
| TGAGGATCACTTGCTGAGTAAGCGGAGAATGGAA         | 35     |
| GCCGTCATCAAATATCGGCCAAACAAATTTACC          | 35     |
| ACTAACATAATATCCAGAACAATTTCTCATACAT         | 35     |
| ATCTAAACGCCAGCCATTGCATTTCCAGCAGGAGT        | 35     |
| TGAAAGGAAACGCTCATGGAAACGATCTTTTAAAC        | 35     |
| GTCAGTTCATTTTGACGCTCAACAGCCCGAGTAAC        | 35     |
| CAAACCCGAAATGGATTATTTAACGCCTCAGTTAA        | 35     |
| ACCTTGCCAGATTCACCAGTCTTCGTCAATCGGAA        | 35     |
| AAATGAACAGTAATAAAAGGGCCATGTAACATGAA        | 35     |
| GCCACGCGGCCAACAGAGATAGATAGCAGAGACTCC       | 36     |
| ATTAACATCTGACCTGAAAGCGCCACCATAGGATT        | 35     |
| AACAGAGTACGTGGCACAGACCTCAGAACAGTACC        | 35     |
| CCCTAAACATCGCCATTAATAATACCGAACGAACCA       | 37     |
| CCAAAATAACCCCGCTTCTAATCTATTACGCTCGCCCTG    | 40     |
| AAACAAAATTAATTACATTTAACAATTTCA             | 30     |
| GTCCTTAGTGCTGAATTGTCAACCTTATGACAATGTCCCG   | 40     |
| ATTGCATCTGCCAGGAGTGAGCTAACTTGGGAAGATCATTG  | 42     |
| AACAGTAACGGGTACGTAGGA                      | 21     |
| TTTGAATTACCTTTTTAATGGA                     | 23     |

|                                           |    |
|-------------------------------------------|----|
| AGGTCATTGCCTGAGAGTCTGGAGCAAAACAAGAGAAT    | 37 |
| CGGTAATCGCACGATCTATGA                     | 21 |
| TTAAACCAAGTACCGCACTCATCGAG                | 26 |
| GAGGGTAGCTATTTTTGAGAGATCTACAAAGGCTATC     | 37 |
| AAATTAAGAGGAAAGAAAACCGACCTGATCTTTG        | 35 |
| TATTCAACAAATATCTCAAATGCCGAAAAAGAAT        | 35 |
| GTCAAATAGCTTCAATAAATATCAATCACAACCTA       | 35 |
| GGGTGAGGGAAGCAGTCCAATTGACCAAGTAATGC       | 35 |
| TGTGTAGAGGATTAATAATGTAGATGAATCCATTA       | 35 |
| TTAAATGTTGCTCCTTTGCCAGGCGCATAGACTTT       | 35 |
| TTTTTAGCATTTTTAGAGGCTTCATCAATACAGAG       | 35 |
| ATTTCAAGCTTAATACGATAAAGAACCGCGGAACG       | 35 |
| ACTTTTGTGTAGCATAACCCAAATCAACTCAGCA        | 35 |
| AAAACATATATGCACATAGTATCATTACGCTTTT        | 35 |
| AAAGCTATCTGGAAACGCCAACCTGACGGCTTGC        | 35 |
| AGCAATAAACAGTTTTCAACTCGAGTAGACCGATA       | 35 |
| GGCAAAGCGAACGATTGAGATGATGGTTAACAACC       | 35 |
| TCCAATAACCATTAAACAGTAATCATTGGATAGTT       | 35 |
| CTAATAGATGGTCAAATAACCGATTTTTTTCTTA        | 35 |
| GAAAAGGTATATTTAAATCTTATACCATCAGCTT        | 35 |
| GAATTAAGTGAAGCTAATTAAGTAAAGAAATAAAACAAGA  | 42 |
| AGGGAAGTGAGCGCCAGAGCCACAGGAGAAAAAAA       | 35 |
| CAGAGAGTAACCCACACCCCTCGACGATTTTTTCA       | 35 |
| AAATGAAAGCCCAAAACCGCCCAAAACAAAAGGAA       | 35 |
| CGATTTAACAATGCGGAACCAAGCCAGTGAGAAT        | 35 |
| TATCCAATCTTACTCTTTTCTCTGACTTTCAA          | 35 |
| AAAATAAGAAAAGCCCCCTTAAGCGTGATGGG          | 35 |
| AGAGCCTAACAAAGCATCGGGATGATAACGTTAG        | 35 |
| AACGCTACCGAGGACGTCAGATAATAAGAAAGTTT       | 35 |
| AATTTAGGAATACCAGAATCGTGCCTTTCATAGT        | 35 |
| TGCTATATGATTACAGCACCGTATAAAGTAGCAT        | 35 |
| AAGCCTTGCAGTATCACCATTGCCTATCCAGTAC        | 35 |
| CCCGACTAAAATACCATTAGCTTCTGAACCGTAAC       | 35 |
| GCGAGGCCAACATAAATCACCAGAGGCTAGCCCAA       | 35 |
| CTTATCCAGACACCTTTGGGAGAAGGATCCCTCAT       | 35 |
| AAGCAAATTTGTCCACCGTCTTTGCTCCGCCAC         | 35 |
| ATCATTAAATCATATATCAATTAAGTCTCAGAAC        | 35 |
| AACAAGCAAGCCGTTTTTATTTTCAT                | 26 |
| TATTATAGTCAGAAGCAAAGC                     | 21 |
| GGATTGCATCAAAAAGATTTGCCGGACGATGAA         | 33 |
| AAGACTCCGTTCTCTAGCATGTCAATCCTAAGTGCCCTGCC | 42 |
| TAATTCGCACCATCCCCGGTTGATAATGAAGCCACGTCGGT | 42 |

|                                                   |    |
|---------------------------------------------------|----|
| CCAGACCAAAGCGCCGCCAAAAACAGGCAGTGCCGGGCCTT         | 42 |
| ACAGGTCGTAAGATATAAGCAAATATTACGACGTATTTCAC         | 42 |
| CCTTTAAACAATGCCTAAACGTTAATATAACGCCACGAACTC        | 42 |
| AAGAGGTAACCCCTCAATTCGCATTAATGCAAGGGTGAAT          | 42 |
| GCTTAGACGCAAGGAAATCAGCTCATTGCTGGCGTAAGCTA         | 42 |
| TATAATGCGGGAGAAATAGGAACGCATGGCCTCTCCTCGAT         | 42 |
| GTTTTAATATGACCAATTCGCGTCTGGCTTGGGAACCCGGGT        | 42 |
| TACGGTGAATCGGTTAGCCAGCTTTCATGCCAATCCGTAATC        | 42 |
| TCCATATAAGCCTCAAATGTGAGCGAGTAAACCAGTTCCTGT        | 42 |
| AATTCTGAATTAGCCGTCGGATTCTCCGCGGCACCCGCTCAC        | 42 |
| TAGTTTGAATCATAAACGCGGATTGAATCGCACTACGAGC          | 42 |
| TTCGCAATAGTAGCGGGATAGGTCACGTGACAGTAGTAAAGC        | 42 |
| GTTTAGCTGGCATCGATGGCGCATCGTAACCGCAGCGAGCT         | 42 |
| GGCACCTGAACAACGCCACCAGAACTTTGCGGACACCGGA          | 42 |
| GGGTAATCGCATTATAGTATCATATGCGATAAATGCGGAAT         | 42 |
| AGAGAGAAATAACAAAATTCTTACCAGTGGTTGATGATTAT         | 42 |
| TGAGTTAAATAGCACAAACGCTCAACAGTATCTTCTTCATCAA       | 42 |
| AGCAAGATTGTTAAATGAGAATCGCCAAATATATTTGGAT          | 42 |
| AATAGCTATCCAAAACAACGCCAACATGAGAACGCATGGAAG        | 42 |
| CTTTTAAACAGCCAGGCAGAGGCATTTTGCAAATCATATCAA        | 42 |
| ATAGCCGAATTTGCGTAATAAGAGAATATAACTATAAACAG         | 42 |
| AAGGAAAACGAGCGCCGACAAAAGGTAATCCGGCTCGTAGAT        | 42 |
| TAATAACTCCTGAACTGTCCAGACGACGTGAGAGATCAGATG        | 42 |
| AACTGGCTTGACCCACAACATGTTACAGCAATTTATGTACCTT       | 42 |
| TTATTCAAATCAAGAACGCGCCTGTTTCGCTGAGACAATAA         | 42 |
| AACGTAGTGCAGGAATAGATAAGTCCTGTAGCGATTGCTTTG        | 42 |
| AAGGTGGGTTTTAGAAAATAATCCACCCCTAGAAATCGC           | 42 |
| AACGCAAGGTATTCTTACGAGCATGTAGTCGCTTCATTT           | 42 |
| AAGTTTATCAGATATCAATAATCGGCTGGAATAACAAAGAAG        | 42 |
| ATAGAAACCGCGCTTATCATTCCAAGACATAAATCAAGA           | 42 |
| TGGTTTACCAGCGCAAAGACAAAAGGGCGACATTCA              | 37 |
| ACCATAAATCAAAATCAGGCTTTACCCTGAC                   | 33 |
| ACCGATTGAGGGAGGGAAGTAAATTTGACGAAAT                | 37 |
| GAGATTTGATCATCGCCTGA                              | 21 |
| TAAATGTGTGAAATCCGGAGAATGGAGTGACCTTAAGT            | 40 |
| TTACTTAGCTTAAAGTGCGGGTTGTGAATTCATGCGTAAAAAGCTGAT  | 49 |
| CAGACGGTTCATTGAGCAACTGGGTGGATGTTCTTATATGTAATATGA  | 49 |
| ACCGAACACTGCGGAATATAGAAGCTTCTCAGGACAGAAAAGGAGACA  | 49 |
| AGAGGACTTAGACTCTGACGCTGTA AACGACGGCAAGATTGTTCAAAA | 49 |
| CAGACCAGAGGGGATTTCTCGGGTTTTCCAGTCTAAATTTGAGTAA    | 49 |
| CTGACCTTTTGCAACTGGTTGCGATTAAGTTGGGTTTGTAAATATATT  | 49 |
| CTTGACAAAACCAACAGGGCTAAAGGGGATGTGCTTTGTATAAAAA    | 49 |

|                                                   |    |
|---------------------------------------------------|----|
| ATTACCTCGTTTACTGTATTATCGCTATTACGCCATTAACCAGCCTTT  | 49 |
| AAGCTGCAGAGCAAGAGGATCGGGCGATCGGTGCGCAAAAATCTGTAAT | 49 |
| AGGCTTGAAGGAATCGAATTAGGCTGCGCAACTGCTTCCTGTGTACCA  | 49 |
| ACCAGAAAATGCAGTAGCTGTGCAAAGCGCCATTCCAACATTAGAGCAT | 49 |
| GGCTTGATTAGGAATGTTATCGCTTCTGGTGCCGGAACAACAAAATTA  | 49 |
| AACTTTAGAAAAGATCACAAATCCAGCCAGCTTTCTGGGAACCAGGCAA | 49 |
| CCTTATGGGAACAAATAAAGTTCGGCCTCAGGAAGCCGTAATTAACA   | 49 |
| GGCTCATACGTTAAGCCTAATTTGAGGGGACGACTGGTAAATCTA     | 49 |
| AGCATTGACCACCCAGAAGGAAAGGCGTTAAATAAAGCCTGTGACGGGA | 49 |
| CAGGTCAAGAACCAGATATCCAATACCGACCGTGTGTATACTAAAAAC  | 49 |
| ATATTATCCCTCATGGCAATGACCTAAATTAATATAAAGCGCCTTTA   | 49 |
| CTCATTAGAGCCACTGATTGTTTTAGTTAATTTAGGGCTTACGTCAA   | 49 |
| AGCGCAGATAATCACTGAATAGAGAAAACCTTTTCATATTTATAAGAAA | 49 |
| GTTCCAGATTAGCGACCTACCCAATCGCAAGACAATAATTTATATATT  | 49 |
| GGCTTTTATTTCTGTCACGTATGTAATGCTGATCGAGCCACAGTTAC   | 49 |
| GTA CTGGCTAGCGAAAATTGTAGTTGGGTATATAAAGTATCTTCC    | 49 |
| GGGGTCAAAGTTTGTAAACGCTACCTTTTAAACCAGTAATTTCTTACC  | 49 |
| AGTGCCCGTAATCAAGTAACACAAAATCATAGGTCACAATAACAGCTAC | 49 |
| TGCCCCGAAACCAGGGAGAAAAGAGTCAATAGTGAATGCAGATTAGT   | 49 |
| CCTATTAAGGCCGCCCTGATAGCTTAGATTAAGAATCAACAGGTTTTG  | 49 |
| AGTATTAAGTAGCAAGTTACAAATCCTTAAAAACAACAAGACGAACT   | 49 |
| TCAAGAATTAGAGCGAATTATTAATTAATTTTCTAATTAAGAAC      | 48 |
| AGCGGGGACCAGCTCTGAGCACTTGCTTCTGTAAAAACCAATAGAAGG  | 49 |
| AGGCGGATAAAGGTAACAAACCAATATATGTGAGTTCTTCCCAATAGC  | 49 |
| CGTCGAGAGGGTTGATATAAGTATAGCCCGGAATAGG             | 37 |
| GCGATTATACCAAGCGCGAAACAAGTACAACG                  | 33 |
| ACCCCAACAAGTTTCACTATT                             | 21 |
| ACACTAAGCCGTAATCCAGTTTGAACTACCGACACAGTTCAGCCCGA   | 49 |
| AAACGAAACCCTAACCGAGATAGGGTTGATCTGTAATCCCCCGCTTT   | 49 |
| CACTACGTTAGAGCCTTATAATCAAAGGGCAGCAATCGTCAAGCGAA   | 49 |
| AACGGGTCGGCGAAGTCCGAAATCGGCGAATCGGGGATAGCAACTCCA  | 49 |
| TTCATGAAAGGGAACGAAAATCCTGTTATAAATCTAATAGTGAGAGTA  | 49 |
| GCTTTGACGGGCGCAGCTGGTTTGCCTGACCTCAAGAAGTTTTGAT    | 49 |
| AGGGTAGGTGTAGCGAGAGTTGCAGCAAGAGTAAAAATAGCGGGGATG  | 49 |
| GCGAAAGTAACCAACCCCTCACCGCCTGCGTGGTGCCAGACGTGCTGAA | 49 |
| GCGGGATTAATGCGAGACGGCAACAGAAAAGACGCACTATCTCAACAT  | 49 |
| AGGGAGTCGACTAGTGGTTTTCTTTTACCAGCTACGAGGACTAAG     | 49 |
| TATTCGAGCACGTGTTTGCATTTGGGATGGTCAATACATAGTTTCAT   | 49 |
| ATCGCCCTCGTTAGGCCAACGCGGGGGGTGAAATACCACAGATTCCC   | 49 |
| GCGCCGACTAAACAGCCAGCTGCATTAATCCATCATCAGGTAGATT    | 49 |
| AACAGCTGGGATTTCCAGTCGGGAAACCGGAAGCCATTATTGATACAT  | 49 |
| GCTTTCGACGCCAGCGTTGCGCTCACTGCTGGGGTTAAAACGATAACCT | 49 |

|                                                   |    |
|---------------------------------------------------|----|
| ATTGTATTTTTATACATTATCATCACATTAATTGAATCCTG         | 42 |
| AGGCTCCCCGAGTATTAATTTAAAGTAACCACCTCAGAGCAGTCAGA   | 49 |
| CGTTGAATCACGCAAAATCCTTTGCCCGTATCATCCACCCTTAATATC  | 49 |
| TTGCGAAGCAATACAACAATTCGACAACCAGATGAGAGCCGCCAAGAAT | 49 |
| AGAAAGGATAACATTTAGAAGTATTAGATATAATCCCACCGTAATAAG  | 49 |
| CAGTTTGAAGAACATAGATAATACATTTATACTAAATCACAAATAGC   | 49 |
| AATTTGCTTGCTGGACTAATAGATTAGAGGTTAGATTGCCACGAAGCC  | 49 |
| TAAATGAATATTACATATCTTTAGGAGCAATTATTGTCATAGTAGCAG  | 49 |
| TGTCGTACACAGGAAATGAGGAAGGTTAAATAAAGCGTTTTTACCAG   | 49 |
| TAGCGTAATACCTAGGCAATCAACAGTTTTTCAGGCCTTAGAACGCAA  | 49 |
| TCCACAGATGCTTCAATCAATATCTGAATATACGTAGCGACCAAAAG   | 49 |
| AAACTACACATTGGTGAACCTCAAATATTACATCTCGATAGAGACTCC  | 49 |
| ACTGAGTACACGACAAATCTAAAGCATCCGATTGAAACGTGTTAGCA   | 49 |
| TAGGAACACATCTTGAGAGCCAGCAGCAATACCACCATTACATACATA  | 49 |
| TTTCAGGGAACCCCTCCGCTGCAACAGTGCAGAGGCCAGCAATAAAGA  | 49 |
| CCTCAGAGTAAGAAGTGAGGCGTCAGTCAATTACTGAGCCAACGGAAT  | 49 |
| CGCCACCAATATTTCCAGCAGAAGATAAATGATGAGAATTATACAATCA | 49 |
| TGTATCACCGTACTCAGGAGTTTAGTACCGCCACCC              | 37 |
|                                                   |    |
| object-label:                                     |    |
| Cy5-TTTATCAGGGCGATGGCCCACTACGTGAACCATCACCCAAT     | 42 |

**Supplementary Table 7:** list of oligonucleotide-sequences of the 10-helix bundle.

| sequence                                           | length | defect variant |
|----------------------------------------------------|--------|----------------|
| TCCACAGATCGTCTTCAATCAATATCTGAATATACGTAGCGACCAAAAG  | 49     | 3              |
| ACTGAGTACACGACAAATCTAAAGCATCCGGATTGAAACGTGTAGCA    | 49     | 3              |
| TTTCAGGGAACCCCTCCGCCTGCAACAGTGCAGAGGCCAGCAATAAAAGA | 49     | 3              |
| ATTTTGCTTGTGGACTAATAGATTAGAGGTTAGATTTGCCACGAAGCC   | 49     | 5              |
| TGTCGTACACAGGAAATTGAGGAAGGTTAAATAAAGCGTTTTTACCAG   | 49     | 5              |
| GCGCCGACTAAACAGCCAGCTGCATTAATCCATCATCAGGTAGATT     | 49     | 8              |
| CGTTGAATCACGCAAAATCCTTTGCCCGTATCATCCACCCCTAATATC   | 49     | 8              |
| AGAAAGGATAACATTTAGAAGTATTAGATATAATCCACCCGTAATAAG   | 49     | 8              |
| GCGGGATTTAATGCGAGACGGGCAACAGAAAGACGCACTATCTCAACAT  | 49     | 10             |
| TATTCGGAGCACGTGTTTGCATTTGGGATGGTCAATACATAGTTTCAT   | 49     | 10             |
| AGTGCCCGTAATCAAGTAACACAAAATCATAGGTACACAATAACAGCTAC | 49     | 15             |
| CCTATTAAGGCCCGCCTGATAGCTTAGATTAAGAAATCAACAGGTTTTG  | 49     | 15             |
| CACTACGTTAGAGCCTTATAAATCAAAGGGCACGAATCGTCAAGCGAA   | 49     | 15             |
| TTGATGAAAGGGAACGAAAATCCTGTTTATAAATCTAATAGTGAGAGTA  | 49     | 15             |
| AGGGTAGGTGTAGCGAGAGTTGCAGCAAGAGTAAATAAGCGGGGATG    | 49     | 15             |
| AACTTTAGAAGATCACAACTCCAGCCAGCTTTCTGGGAACAGGCAA     | 49     | 20             |
| CAGGTCAAGAACCAGATATCCAATACCGACCGTGTATTACTAAAAAC    | 49     | 20             |
| CTCATTAAAGGCCACTGATTGTTTAGTTAATTCAGGGCTACGTCAA     | 49     | 20             |
| GTTCCAGATTAGCGACCTACCCAATCGCAAGACAATAATTATATATT    | 49     | 20             |
| GTA CTGGCTGTAGCGAAATTGTAGGTTGGGTTATATAAAGTATCTTCC  | 49     | 20             |
| CAGTTTCGAAGAACATAGATAATACATTTATACTAAATCACAAATAGC   | 49     | 30             |
| TAAATGAATATACATATCTTAGGAGCAATTATTGTCATAGTAAGCAG    | 49     | 30             |
| TAGCGTAATACCTAGGCAATCAACAGTTTTTCAGGCCCTTAGAACGCAA  | 49     | 30             |
| AAACTACACATTGGTGAACCTCAAATATTACATCTCGATAGAGACTCC   | 49     | 30             |
| TAGGAACACATCTTGTAGAGCCAGCAGCAATACCACCATTACATACATA  | 49     | 30             |
| ACCGAACACTGCGGAATATAGAAGCTTTCTCAGGACAGAAAAGGAGACA  | 49     | 30             |
| CAGACCAGAGGGGGATTTCTCGGGTTTTCCAGTCTAAATTGTGAGTAA   | 49     | 30             |
| CTTGACAAAACCAACAGGGCTAAAGGGGATGTGCTTTTGTATAAAAA    | 49     | 30             |
| AAGCTGCAGAGCAAGAGGATCGGGCGATCGGTGCGCAAAAATCTGTAAT  | 49     | 30             |
| ACCAGAAAATGCAGTAGCTGTGCAAAGCGCCATTCCAACATTAGGCAT   | 49     | 30             |
| TGCCCCGAAACCAGGGAGAAAAGAGTCAATAGTGAATGCAGATTAGT    | 49     | 40             |
| AGTATTAAGTAGCAAGTTACAAATCCTTGAAAACAACAAGACGAACCT   | 49     | 40             |
| AAACGAAACCCTAACCGAGATAGGGTTGATCTGTAATCCCCCGGTTT    | 49     | 40             |
| AACGGGTGGGGAAGTCCGAAATCGGCAATCGGGGATAGCAACTCCA     | 49     | 40             |
| GCTTTGACGGGCGCAGCTGTTTGCCTGACCTCAAGAAGTTTTGAT      | 49     | 40             |
| GCGAAAGTAACCACCCCTCACCCGCTGCGTGGTGCCAGACGTGCTGAA   | 49     | 40             |
| AGGGAGTCGTACTAGTGGTTTTCTTTTACCAGACTACGAGGACTAAAG   | 49     | 40             |
| ATCGCCCTCGTTAGGCCAACGCGGGGGTGAATAACACAGATTCCC      | 49     | 40             |
| AACAGCTGGGATTTCCAGTCGGGAAACCGGAAGCCATTATTGATACAT   | 49     | 40             |
| TTGCGAAGCAATACAACAATTCGACAACAGATGAGAGCCGCCAAGAAT   | 49     | 40             |
| AGAGGACTTAGACTCTGACGCTGTAACACGACGGCAAGATTGTCAAAA   | 49     | 50             |



|                                                   |    |    |
|---------------------------------------------------|----|----|
| CTGACCTTTTGCAACTGGTTGCGATTAAGTTGGGTTTGTAAATATATT  | 49 | 50 |
| ATTACCCTCGTTTACTTGTATCGCTATTACGCCATTTAACCAGCCTTT  | 49 | 50 |
| AGGCTTGAAGGAATCGAATTAGGCTGCGCAACTGCTTCCTGTGTACCA  | 49 | 50 |
| GGCTTGATTAGGAATGTTATCGCTTCTGGTGCCGGAACAACCAAAATTA | 49 | 50 |
| CCTTATGGGAACAATAAAGTTTCGGCCTCAGGAAGCCGTAATTAACA   | 49 | 50 |
| ATATTCATCCCTCATGGCAATGACCTAAATTAATATAAAGCGCCTTTA  | 49 | 50 |
| AGCGCAGATAATCACTGAATAGAGAAAACCTTTTCATATTATAAGAAA  | 49 | 50 |
| GGCTTTTATTTTCGTGCACGTATGTAATGCTGATCGAGCCACAGTTAC  | 49 | 50 |
| GGGGTCAAAGTTTGTAAACGCTACCTTTTAAACCAGTAATTTCTTACC  | 49 | 50 |

**Supplementary Table 8:** list of omitted oligonucleotides for the pseudo-defect-variants of the 10-helix-bundle.

| Sequence                                        | Length |
|-------------------------------------------------|--------|
| GGGCGAAAAACCGTCTATCAGGGCGATGGCCACTAC            | 37     |
| CGTCAAAGTGCCGTATTACCTGAAAGGATTGTTAGAAATT        | 42     |
| ATTAAAGGAACCGTCTCAATGCACAGAGCAATTCGTTTAAAC      | 42     |
| AGTTTGGATTTAGATGGAAATGGCTATTATTCCTGCAGTAAC      | 42     |
| GATAGGGGCCGGCGTTGCAACGAACTGAAAGGAGCCGGGAGA      | 42     |
| TAAATCAGGAAGGGGAACAATCGCCATTGCGGAACCGCCTGA      | 42     |
| CGAAATCAGCGGGCCGGCCTAACACCTTTGAGTAAGTTAC        | 42     |
| AATCCTGAAGTGTAGAGTAGACAGAGGTGAACGTTGCGAATT      | 42     |
| TGGTTTGCCTAACCTAGTAATTAACACCCCTCGTATCCTGAGC     | 42     |
| GTTGCAGGCTTAATTTGTAGCCACGCTGACTTTACAAACAAA      | 42     |
| TCACCGCCCGGTACGTCATCATGAAAATTGAGGAAATTAAT       | 42     |
| CGGGCAACGAGCACGGCCACCCTTGCTGAGCCGTCTCATTTG      | 42     |
| TTTTTCTCCTCGTTAAGTGTAAACCTCCACTAACATGGAAA       | 42     |
| GCGTATTAGCTAAAACGGTACCAGTTGGTATCTAAATATATG      | 42     |
| ACGCGCGAACAAAGGCGATTAAAGTAAATCACCAGAGCCGCCG     | 42     |
| GCTGCATAACGCCACCAGCTGAATTAATCAGTCAATCAAATA      | 42     |
| GTCGGGAACGACGTGCGGGCCCTATTTAAGGGTGGAGCTTC       | 42     |
| GCGCTCACAGTGCCCTGTTGGAGGCTATAATGTGCGGAAGC       | 42     |
| CTAACTCGAAGCCATTGCGCAAGAGCTTTTTAAACAGGATT       | 42     |
| CTGGGGTCTAAGTGCAGAACCAATCGATAATTTTATGCTC        | 42     |
| CGGAAGCCCGCACGATTCCGGCAAAGTATTCTCATTCTT         | 42     |
| AATTCCAGTGTGAAAGATCGGTACCCCATCTTTAGCTTAA        | 42     |
| GTGAAATGACAATGGACGACAAAAGCCCCAAAACGCTGTAG       | 42     |
| ATGGTCACCCCGCTCATCTGCTTGATAATAAGCAATATGC        | 42     |
| ACCGAGCGCTCGCCGATGGGCTGTAAATAAGCAAGTCTGGA       | 42     |
| AAAGACGTGATACCGGGATAGTAAATAAGGCAATAACAGT        | 42     |
| CGTGGTGCCATCTAAACGGCGTTAAATCATCCAAGCGAACG       | 42     |
| GTGTAATGAGTAAAGGTGGGCCGTCGGAACCAATACTAATGACCATT | 49     |
| AAATCATTCTCCGAACTCTGACCTCCTGGTTG                | 33     |
| GTGAACCATCACCAATCAAGTTTTTTGGGGTCGAG             | 37     |
| TAGGGCCCTTGAATCGGCTGACGCATTTACAT                | 33     |
| CAGTCACACGACCAGTAATAAAA                         | 23     |
| AATGGATAAAGCACGGAAGGTCATTACCATTAGCA             | 35     |
| TTTTGACAAAGGGAACATCAAACGTCACCAATG               | 35     |
| ACGCTCAGCTTGACAGCGCCACGATAGCAGCACCG             | 35     |
| CCAGCCAAACGTGGAGAAAATAGCGACAGAATCA              | 35     |
| ATATCCAAAGAAAGGTTTATTCTTTAGCGTCAGAC             | 35     |
| AAACTATGCTAGGGCGCAAAGCGTTTTTCATCGGCA            | 35     |
| CTTGCTGCGGTCAGGTGGCATCATAGCCCCCTTA              | 35     |
| CTTTGATACCACCGTAGAATTGCCATCTTTTCA               | 35     |
| TTAACCGCGCCGATTACGCAATCACCGGAACCA               | 35     |

|                                                    |    |
|----------------------------------------------------|----|
| AGAGTCTTATGGTTCTGGCATCACCGGAACCGCCT                | 35 |
| TCAGTGAGTATAACATAACGGAGCGCCACCCTCA                 | 35 |
| TCCTGAGAGAATCAGGAAACCCACCCTCAGAGCCA                | 35 |
| GACAGGACAGGAGGAGCGAACAGAGCCGCCACCA                 | 35 |
| GGGGATGTGCTGGGAATCAACCGTTCTAAGGACAGAAACAAC         | 42 |
| TATTACGGGGTTTTTTTGTGCGTACAGGAGGTTGA                | 35 |
| GATCGGTTGTAAGTTAGCGCAGACGATTGGCCT                  | 35 |
| TGCGCAAAAGCTTTATTCCACCACAAGAAATAAA                 | 35 |
| AGCGCCAGGGTGGAAACAACTTAAAGCCAGAATGG                | 35 |
| CTGGTGCGTTGTGAACACTGAAGTCTCTGAATTA                 | 35 |
| GCCAGCTCTTAAGTAATAGGAAGTAAGCGTCATAC                | 35 |
| CCTCAGGATTGCAATTTTATTGATGATACAGGA                  | 35 |
| AGGGGACTCCCGCCACCCTCAGGTAATAAGTTTTA                | 35 |
| AACCGTGTCTAATCACCGCCACAGTGCCTTGAGTA                | 35 |
| TGGTGACTGGAGTTTAGTACCGTATAAACAGTT                  | 35 |
| CCGTAATGACAGTGTATCACCTGCCTATTTCCG                  | 35 |
| TGGGAACGTAAGCAATAAGTATATTCTGAACATG                 | 35 |
| AGCGAGTAACAACCACGAATAAGTCCGTAAGAGG                 | 35 |
| GCCAGCTTTCATCAACATTAATGTG                          | 26 |
| GGGACATTCTGGCCAACAGAGATAGAACCC                     | 30 |
| CATCAAAAATAATCGCGTCTGGCCTCCTGTGA                   | 33 |
| TACTTCTGAATAATGGAAGGGTTAGAACCT                     | 30 |
| GGTGGCATCAATCGGAACGCAAGACTGTCACCCTCAGCAG           | 42 |
| TTTTCATTTGGGGCGGAGCTGAAAA                          | 26 |
| GCGTAGAAAAATTATGCGTTATACAAATGTTGCTAATACGTGCGTCTGA  | 49 |
| GTCAGATGTTAATAGTATAAAGCCAACCTGAAGCCTTTGAATACCTACA  | 49 |
| AGTACCTAACCTTTAGTAGGGCTTAATTCTCCCGAAATGCGCAGGAAAA  | 49 |
| AACAATAGCAAGACGCCATATTAACAACCGCAGAAAAATATACCG      | 49 |
| TTGCTTTAATGCTGATGTAATTTAGGCAGGCTTATCCGAACGGCTGGTA  | 49 |
| AAAATCGTGGTTATTTGAGCCAGTAAGCAAGCAGATAAAAAAGAACTC   | 49 |
| ATTCATTTTTTAAATATAAAGTACCGAGAATCATTACAGTATAACATCA  | 49 |
| AAAAGAATCATAGGTAAAGTAATTTGTCGGTTTTACAGTGCAATACTT   | 49 |
| CATCAAGTCAATAGACGACAATAACAACACTCATGCAGCAAAACGCAAA  | 49 |
| TACATTTAGATTAAGCTAATGCAGAACCGGATGCATCACGAGTAAA     | 49 |
| AATTACCTTGAAAAATTATCAACAATAGCTTTCTAATATCATTATAA    | 49 |
| CAGTACAATTAATCTGAACAAGAAAAAACAATATCTGGTGCCAGAA     | 49 |
| TGAGTGAATAACATGAATTGAGGAAGTCAATCATACGAGCAGTAAGC    | 49 |
| AAGCCCGGATTGCATAGGCTGGCTGACTTGAAAGGCTGATAGCGAAAG   | 49 |
| TCGCGTTATTATAAAGAGTAATCTTGAAGGGAACAGGGTAGTCTTCGC   | 49 |
| AAAGCGAAAAATCAGCGGATATTACATACAGGCGCATCAAGAAGGGC    | 49 |
| AAACTCCACGAGAAAACGTAAACAAGCTCCATGTTTTGCCTGTTACAGGC | 49 |
| AGAGAGTATGCTTTCAGTGAATAAGGCTTGTGCAAAACAAGCAGGCAA   | 49 |

|                                                    |    |
|----------------------------------------------------|----|
| CTTTTGATATTCATACGAGAAACACCAGGTATCATAATCGTAACCGCTT  | 49 |
| TGCGGATATACTGCAGTAAATTGGGCTTAACAAAGATCATATCACTCCA  | 49 |
| TTGCTGAGTTAGATTTAATTTCAACTTCAGCGATAATCAGAGTATCGG   | 49 |
| CTCAACACAGAGGGTGTGAATTACCTTAAAAACACAGGAAGACAGTTTG  | 49 |
| AACTAAACTTTTGCTTAAGAACTGGCTCAAAGAGGATTTAAAGCATCGT  | 49 |
| AGTTTCAAAAAACCCAGTCAGGACGTTGCGAAGGCATTTTGTGCACGT   | 49 |
| TGATTCOCCTCGTTAAATCTACGTTAATGTAAAATAATTTTGGATTGA   | 49 |
| AGTAGATTAAAGACTAACGGAACAACGAGGAAGTTTTTATTCTCCG     | 49 |
| AGATACAAAAAGACAGGTAGAAAGATT                        | 28 |
| TTTCGCAATGGTCAATAACCTGTTTAGCTATA                   | 33 |
| CGACCGTGTGATAAATAAGGCGTTAAATAAGAA                  | 33 |
| CTGACCTTTTTCAGATCAATATAATCCTCGTAAGATTTTGAATCCCAA   | 49 |
| TATTTTAGAATATAATTATCAGATGATGCAATATTTTAAATCGATTTT   | 49 |
| GCGAGAATTTACATGGAATTATCATCATAGTCTTTCTTGCGGAATGAAA  | 49 |
| TCCAATCACGGATTAAGAAACACCAGTAGCCCTGCGTTTTAGAGAGA    | 49 |
| ATATGTAGAATACCAACATTATCATTAAAAATACCGGTATGGGAAGC    | 49 |
| CTTAGGTCGAGAGATAATTTTAAAGAGCAGAAAATCAGAAATTAAC     | 49 |
| GACTACCTCAATTATAAATCCTTTGCCCGAGGCGGTACCGCGAAAGTCA  | 49 |
| ATCAAAAGATGATGAAACAATTCGACAAGCCTGCATATTTTCGCTAATA  | 49 |
| AGAAGAGAAAAAATTTAGAAATTTAGAGAGCCACGAGAACCACAAGA    | 49 |
| ATAGCTTAACAATTAATAGATAATACATATCTAAATAAACCAATAATA   | 49 |
| AGAATCCTTTTTTAACTAATAGATTAGAACCTCATATCATTGAAATA    | 49 |
| GCTATTATAAATCAAATATCTTTAGGAGAATCAATCAATAATACCGAAG  | 49 |
| TTCTGTACCATCCTAACAGACCAGGCGCATCAAAAAGCTTGC         | 42 |
| GCAAAGCAAAGACTATCACCATCAATATGATATAGTAAGAGG         | 42 |
| CCCTGACTTAATTCAGAAAGGCCGAGAGCCGAGCGAACTGGCGGAGT    | 49 |
| AAATCAAACCAGACAGGTAAGATTCAATGAGAGAGACGGTCACAACCTA  | 49 |
| TCAGAAAAACAGGTTGCAATGCCTGAGTCAGGTCAACTTAGCAATAATT  | 49 |
| CCCTCAAACCTTTAAGAACCCCTCATATAGGAGCAAATCCGCGATCTCCA | 49 |
| TCATAATAAGAGGAACGCAAGGATAAAGAACGGTCGCCTGAAAAGGAG   | 49 |
| GCGTCCAGGCTTAGTGCGGGAGAAGCCTCATGTATACAACGGGTTTAT   | 49 |
| GTAAAATATAATATTATGACCCTGTAGGTTGATATACCAGGTGAAT     | 49 |
| GTTTTGCTGTTTTATAAATCGGTTGTACCAAAAACTCATCTTGATACCG  | 49 |
| CGAGAGGGTACGGTTAAAGCCTCAGAGCAGCAAATCAAAGAAATGACA   | 49 |
| CGACGATTTCCATAAGAATTAGCAAATCGTTAATCAACCCGCATAA     | 49 |
| TCATAACCAATCTTAAATCATACAGGCCGATTAAACGTAATCGCTGAG   | 49 |
| GGCATAGTTAGTTTAGTAGTAGCATTACAGCTCAITTCATAAAGGCC    | 49 |
| CACATTCAACTAATGCAGATACATAACGCC                     | 30 |
| TAAACCCGGAATCATAATTACTAGA                          | 26 |
| AAAAGCCTGTTTAGACAATTTTCTGACATTGGCAGATTAC           | 42 |
| TATCATAATGGTTTGAATACGAAATAATGGATTA                 | 35 |
| CATCAGTTGAGATTTAGGAATAC                            | 23 |

|                                            |    |
|--------------------------------------------|----|
| TATCCTGAATCTTACCAACGCTAACGAGCGTCT          | 33 |
| GTAGCAACGGCTACAGAGGCTTTGAGGACT             | 30 |
| TTCCAGAGCCTAATTGCCAGTTACAAAATAACAGCCAT     | 40 |
| TCCAAATGAGGGAGTAAATCGAACGTGGACTCCAA        | 35 |
| TGTTTTAAAGGGCGGCCCGAACAAAGAGTCCACT         | 35 |
| ATAGCAGGTTTACCGGGAAATTGAGTGTGTCC           | 35 |
| ATAACATAATCAATCGAGAAAAAGAATAGCCCGA         | 35 |
| GCATTAGGGAATAACGAAAGGGGCAAAATCCCTTA        | 35 |
| TGAACACAAAGAACGCTGGCTTGTGTTGGTTC           | 35 |
| GAGGGTAACATAAACGCTGCGCCCGCAGCGCGAA         | 35 |
| TCAGAGATAGCAAACCGCCGCAAGCGGTCCACGC         | 35 |
| ATTGAGTACTCCTTTACAGGGCTGGCCCTGAGAGA        | 35 |
| AGAGCAAAAAAGAAGCTTTGACAGCTGATTGCCCT        | 35 |
| GCAATAGCGCAATAGTGCTTTTTCCACAGTGAGA         | 35 |
| CCCTTTTACCAGAAGAGCGGGGGCGCCAGGGTGG         | 35 |
| AGTGGGATTTGCTATGAACGGTGTATTACAGTTGGATTTA   | 42 |
| TTTCAACAGACGTTGTTGGGTTAATGAATCGGCCA        | 35 |
| GAGAATACTAAAGTCCAGTCAACCTGTCGTGCCA         | 35 |
| AAGGAATCCTCATAACGACGGCTGCCCGCTTTCCA        | 35 |
| TTTTACCTGTAGCCTCAGGAACATAATTGCGTT          | 35 |
| AAAAAACACCAGTTGTTCTTGCCTAATGAGTGAG         | 35 |
| CCTTTAATACCGTAATTCATGATAAAGTGTAAGC         | 35 |
| CAGCTTGCAAGCCCGTCTTACACAACATACGAGC         | 35 |
| TTCTTAACACCCTCACCTTATTGTTATCCGCTCAC        | 35 |
| ATAGTTGAACCGCCAAAATAATAGCTTTTCTGT          | 35 |
| ACAACCACCTCAGATATTACTCGAATTCGTAATC         | 35 |
| CCGATATCAGGAGGACTCTAGAGGATCCCCGGGT         | 35 |
| GCTTGCAAGTAAAGCGCCCTTGTACCTCGAT            | 35 |
| GCTTTGGGTTGATACTCGTCCAGGGCTTAAGCTA         | 35 |
| CGAAAGACAGCATCGGAACGAGG                    | 23 |
| GACGGAATATTATTAAAGGTGAATTATCACCGTCACC      | 40 |
| AGCGGGTITTTGCTCAGTACCAGGCGGATA             | 30 |
| GACTTGAGCCATTTGGGAATTAGAGCCAGCAAAATCACCA   | 40 |
| GTAGCACAATATTATTATTTCCAGCT                 | 28 |
| AGGCCGACCGATTAAAGAAACAAGATTATCTACCTCATCTT  | 42 |
| AAACCATAAGACAACGTCAAAGAGGTTTGCTCAACTCAAATA | 42 |
| TAATCAGTCATATGCTTTACAGCGAACGAGAATCAAGAAC   | 42 |
| AGTTTGCTTGTACAAAAACATCTAAGACGCCAACATGCAAA  | 42 |
| TGTAGCGACACCACACGGGAGTATAGAAGAGGCATTATAACT | 42 |
| TTTTCGGACATACCTGAACCCCAATAAAGAGACCTCCGG    | 42 |
| TTAGCGTAATACATATTGAGCATCGTAGCAAAAGGCTGAGA  | 42 |
| TAATCAAAGTATGTGATAACCAAGCAAGCCAGACGTGAATTT | 42 |

|                                             |    |
|---------------------------------------------|----|
| GAGCCACGATTAAGTAAGCCAGTACCGCATGTTGACGCTG    | 42 |
| CCCTCAGAATACCCGAAACAACCAAGAAGCGCCTGCATAGCG  | 42 |
| GAACCGCAGGAAACTATCTTCGGCTGTATAAGTCTTCCCTT   | 42 |
| CCACCCTCAAAGTTAAGAAAATGTAGATAATCAATCGTC     | 42 |
| GAACCACGAATTTCTGTAATCCGATTAGGGAGAGGCGGTTT   | 42 |
| CCAGCATTCTTCCAGTTTCAACCAACTCTTCATCGTCAGAA   | 42 |
| GGCAGGTTAACGATGAAAGGAAATCATAAGAACGCTTTTA    | 42 |
| TGATATTAGACAGCTGCGAATCGGAACGCCAAATCTGACCAT  | 42 |
| TCCTCATAACAACGCGTTGAAAACCTGCTGCTCATAAACAGT  | 42 |
| AAAGCGGTTTCGTGGCTCCATAAATTGTGCCCTGGAATCC    | 42 |
| CCGTTCCACCCATGTTGTATCGAGATTTAACGAGTGGAAATCG | 42 |
| ATGGCTTGGGATAGCTTTCGAAGCGCGAGAGATGGCTGGATA  | 42 |
| GTGTACTGAGCCACACAGCTTTGACCCCTAATCATGGTAATA  | 42 |
| ACGGGGTCCCTCAGCGCCGACATACACTTGCATTAAAGAA    | 42 |
| ACAGTGCCCGCCACTCGCCATAAACGATTATACAAAATAG    | 42 |
| AATGCCCCCGTACTATTGCGTGCCACTAGGAAGAATACCAGA  | 42 |
| AACCTATTAGCCCGGGAGTTTAAACGGAAAACGAAACACTA   | 42 |
| AAAGTATTGAGAGCGGGATCTTTCATATTATTAATTACGA    | 42 |
| CTGAGACTCCTCAAGAGAAGGATTAGGATT              | 30 |
|                                             |    |
| object-label:                               |    |
| Cy5-TTACCATATCAAAATTTATTTGCACGTAACA         |    |

**Supplementary Table 9:** list of oligonucleotide-sequences of the 12-helix bundle.

| sequence                                            | length | defect variant |
|-----------------------------------------------------|--------|----------------|
| GTAAAATATATAATATTATGACCCTGTAGGTTGATTATACCAGGTGAAT   | 49     | 3              |
| CGAGAGGGTACGGTTAAAGCCTCAGAGCAGCAATCAAAGAAATGACA     | 49     | 3              |
| TCATAACCAATTCTTAAATCATAACAGGCCGATTAAACGTAATCGCTGAG  | 49     | 3              |
| TCAGAAAAACAGGTTGCAATGCCTGAGTCAGGTCAACTTAGCAATAATT   | 49     | 5              |
| TCATAAATAAGAGGAACGCAAGGATAAAGAACGGTCGCCTGAAAAGGAG   | 49     | 5              |
| AGAAGAGAAAAAATTTAGAAGATTAGAGAGCCACGAGAACCAAGA       | 49     | 8              |
| AGAATCCTTTTTTAACTAATAGATTAGAACCTCATATCATTGAAATA     | 49     | 8              |
| CCCTGACTTAATTCAGAAAGCCGGAGAGCCGGAGCGAACTGGCGGAGT    | 49     | 8              |
| AACTAACTTTTGCTTAAAGAACTGGCTCAAAGAGGATTTAAAGCATCGT   | 49     | 10             |
| TGATTCCCCTCGTTAAATCTACGTTAATGTAATAAATTTTTGGATTGA    | 49     | 10             |
| AATTACCTTGAAAAATTTATCAACAATAGCTTTCTAATATCATTATAA    | 49     | 15             |
| TCGCGTTTATTATAAAGAGTAATCTTGAAGGGAACAGGGTAGTCTTCGC   | 49     | 15             |
| AACTCCACGAGAAAACGTAACAAAGCTCCATGTTTTGCCTGTTCAAGC    | 49     | 15             |
| CTTTTGATATTCATACGAGAAACACCAGGTATCATAATCGTAACCGCTT   | 49     | 15             |
| TTGCTGAGTTAGATTTAATTTCAACTTCAGCGATAATCAGAGTATCGG    | 49     | 15             |
| ATTCATTTTTTAAATATAAAGTACCAGAAATCATTGATAACATCA       | 49     | 20             |
| GCGAGAAATTACATGGAATTATCATCATAGTCTTTCTTGCAGGAAATGAAA | 49     | 20             |
| ATATGTAGAATACCAACATTATCAITTTAAAAATACCGGTATGGGAAGC   | 49     | 20             |
| GACTACCTCAATTATAAATCCTTTGCCCGAGGCGGTACCGCGAAAGTCA   | 49     | 20             |
| CATCAAGTCAATAGACGACAATAAACAACTCATGCAGCAAAACGAAA     | 49     | 20             |
| ATCAAAAGATGATGAAAACAATTCGACAAGCCTGCATATTTTCGCTAATA  | 49     | 30             |
| ATAGCTTAACAATTAATAGATAATACATATCTAAATAAACCAATAATA    | 49     | 30             |
| GCTATTATAAATCAAATATCTTTAGGAGAAATCAATCAATAATACCGAAG  | 49     | 30             |
| AAATCAAACCAGACAGGTAAGATTCAATGAGAGACGGTCACAACCTA     | 49     | 30             |
| CCCTCAAACCTTTAAGAACCCATATAGGAGCAATCCGCGATCTCCA      | 49     | 30             |
| GCGTCCAGGCTTAGTGCGGGGAGAGCCTCATGTCATACAACGGTTTAT    | 49     | 30             |
| GTTTTGCTGTTTTATAAATCGGTTGTACCAAAAACCTCATCTTGATACCG  | 49     | 30             |
| CGACGATTTCCATAAGAATTAGCAAAATCGTTAATACCAACCCGCATAA   | 49     | 30             |
| AGTACCTAACTTTTAGTAGGGCTTAATCTCCGAAATGCGCAGGAAAA     | 49     | 30             |
| TTGCTTTAATGCTGATGTAATTTAGGCAGGCTTATCCGAACGGCTGGTA   | 49     | 30             |
| TCCAATCACGGATTAAGAAACACCAGTAGCCCTGCGTTTTAGAGAGA     | 49     | 40             |
| CTTAGGTCGCAGAGATTAATTTAAAGAGCAGAAAATCAGAAATTAAC     | 49     | 40             |
| AAAAGAATCATAGGTAAGTAATCTGTCCGTTTTACAGTGCAATACTT     | 49     | 40             |
| TACATTTAGATTAAGCTAATGCAGAACCGGGTATGCATCAGGAGTAAA    | 49     | 40             |
| CAGTACAATTAATCTGAACAAGAAAAAACAATATCTGGTGCCAGAA      | 49     | 40             |
| AAAGCGAAAATCAGCGGATTTATTACAGGCGCATCTACAAGAAGGGC     | 49     | 40             |
| AGAGAGTATGCTTTCAGTGAATAAGGCTTGTGAAACAAGAGCAGGCAA    | 49     | 40             |
| TGCGGATATACTGCAGTAAATGGGCTTAAACAAGATCATATCACTCCA    | 49     | 40             |
| CTCAACACAGAGGGTGTGAATTACCTTAAAAACACAGGAAGACAGTTTG   | 49     | 40             |
| AGTTTCAAAAACCCAGTCAGGACGTTGCGAAGGCATTTTGTGTCACGT    | 49     | 40             |
| GCGTAGAAAATTTATGCGTTATACAAATGTTGCTAATCGTGCCTCTGA    | 49     | 50             |

|                                                   |    |    |
|---------------------------------------------------|----|----|
| TGAGTGAATAACATGAATTGAGGAAGGTCAAATCATACGAGCAGTAAGC | 49 | 50 |
| AAGCCCGGGATTGCATAGGCTGGCTGACTTGAAAGGCTGATAGCGAAAG | 49 | 50 |
| AGTAGATTAAGAGCACTAACGGAACAACGAGGAAGTTTTTATTCTCCG  | 49 | 50 |
| CTGACCTTTTTCAGATCAATATAATCCTCGTAAGATTTTGAATCCCAA  | 49 | 50 |
| AAATAAACAGCCATGACGGAAGTCCGAGGGCGAAAAACCGTCTATCAG  | 49 | 50 |
| GTCAGATGTTAATTAGTATAAAGCCAAGTGAAGCCTTTGAATACCTACA | 49 | 50 |
| AACAATAGCAAGACGCCATATTTAACAAACGCGAGAAAACATATTACCG | 49 | 50 |
| AAAATCGTGGGTTATTTGAGCCAGTAAGCAAGCAGATAAAAAGAACTC  | 49 | 50 |
| TATTTAGAATATAATTATCAGATGATGCAATATTTAAATCGATTTT    | 49 | 50 |

**Supplementary Table 10:** list of omitted oligonucleotides for the pseudo-defect-variants of the 12-helix-bundle.



| Sequence                                        | Length |
|-------------------------------------------------|--------|
| GGGCGAAAAACCGTCTATCAGGGCGATGGCCACTAC            | 37     |
| CGTCAAAGTGCCGTATTACCTGAAAGGATTGTTAGAAATT        | 42     |
| ATTAAGGAACCCCTGCTCAATGCACAGAGCAATTCGTTAAC       | 42     |
| AGTTTGGATTTAGATGGAAATGGCTATTATTCCTGCAGTAAC      | 42     |
| GATAGGGGCCGGCGTTGCAACGAACTGAAAGGAGCCGGGAGA      | 42     |
| TAAATCAGGAAGGGGAACAATCGCCATTGCGGAACCGCCTGA      | 42     |
| CGAAATCAGCGGGCCGGCCTAACACCTTTGAGTAAGTTAC        | 42     |
| AATCCTGAAGTGTAGAGTAGACAGAGGTGAACGTTGCGAATT      | 42     |
| TGGTTTGCCTAACCTAGTAATTAACACCCCTCGTATCCTGAGC     | 42     |
| GTTGCAGGCTTAATTTGTAGCCACGCTGACTTTACAAACAAA      | 42     |
| TCACCGCCCGGTACGTCATCATGAAAATTGAGGAAATTAAT       | 42     |
| CGGGCAACGAGCACGGCCACCCTTGCTGAGCCGTCTCATTGG      | 42     |
| TTTTTCTCCTCGTTAAGTGTAAACCTCCACTAACATGGAAA       | 42     |
| GCGTATTAGCTAAAACGGTACCAGTTGGTATCTAAATATATG      | 42     |
| ACGCGCGAACAAGGCGATTAAAGTAAATCACCAGAGCCGCCG      | 42     |
| GCTGCATAACGCCACCAGCTGAATTAATCAGTCAATCAAATA      | 42     |
| GTCGGGAACGACGTGCGGGCCCTATTTAAGGGTGGAGCTTC       | 42     |
| GCGCTCACAGTGCCCTGTTGGAGGCTATAATGTGCGGAAGC       | 42     |
| CTAACTCGAAGCCATTGCGCAAGAGCTTTTTAAACAGGATT       | 42     |
| CTGGGGTCTAAGTGCAGAAACAATCGATAATTTTATGCTC        | 42     |
| CGGAAGCCCGCACGATTCCGGCAAAGTATTCTCATTCTT         | 42     |
| AATTCCAGTGTGAAAGATCGGTACCCCATCTTTAGCTTAA        | 42     |
| GTGAAATGACAATGGACGACAAAAGCCCCAAAACGCTGTAG       | 42     |
| ATGGTCACCCCGCTCATCTGCTTGATAATAAGCAATATGC        | 42     |
| ACCGAGCGCTCGCCGATGGGCTTGAATAAGCAAGTCTGGA        | 42     |
| AAAGACGTGATACCGGGATAGTAAATTAAGGCAATAACAGT       | 42     |
| CGTGGTGCCATCTAAACGGCGTTAAATCATCCAAGCGAAGC       | 42     |
| GTGTAATGAGTAAAGGTGGGCCGTCGGAACCAATACTAATGACCATT | 49     |
| AAATCATTCTCCGAACTCTGACCTCCTGGTTG                | 33     |
| GTGAACCATCACCAATCAAGTTTTTGGGGTTCGAG             | 37     |
| TAGGGCCCTTGAATCGGCTGACGCATTTACAT                | 33     |
| CAGTCACACGACCAGTAATAAAA                         | 23     |
| AATGGATAAAGCACGGAAGGTCATTACCATTAGCA             | 35     |
| TTTTGACAAAGGGAACATCAAACGTCACCAATG               | 35     |
| ACGCTCAGCTTGACAGCGCCACGATAGCAGCACCG             | 35     |
| CCAGCCAAACGTGGAGAAAATAGCGACAGAATCA              | 35     |
| ATATCCAAAGAAAGGTTATTCTTTAGCGTCAGAC              | 35     |
| AAACTATGCTAGGGCGCAAAGCGTTTTTCATCGGCA            | 35     |
| CTTGCTGCGGTCAGGTGGCATCATAGCCCCCTTA              | 35     |
| CTTTGATACCACCGTAGAATTGCCATCTTTTCA               | 35     |
| TTAACGGCGCCGATTACGCAATCACCGGAACCA               | 35     |

|                                                    |    |
|----------------------------------------------------|----|
| AGAGTCTTATGGTTCTGGCATCACCGGAACCGCCT                | 35 |
| TCAGTGAGTATAACATAACGGAGCGCCACCCTCA                 | 35 |
| TCCTGAGAGAATCAGGAAACCCACCCTCAGAGCCA                | 35 |
| GACAGGACAGGAGGAGCGAACAGAGCCGCCACCA                 | 35 |
| GGGGATGTGCTGGGAATCAACCGTTCTAAGGACAGAAACAAC         | 42 |
| TATTACGGGGTTTTTTTGTGCGTACAGGAGGTTGA                | 35 |
| GATCGGTTGTAAGTTAGCGCAGACGATTGGCCT                  | 35 |
| TGCGCAAAAGCTTTATTCCACCACAAGAAATAAA                 | 35 |
| AGCGCCAGGGTGGAAACAACTTAAAGCCAGAATGG                | 35 |
| CTGGTGCGTTGTGAACACTGAAGTCTCTGAATTA                 | 35 |
| GCCAGCTCTAAGTAATAGGAAGTAAGCGTCATAC                 | 35 |
| CCTCAGGATTGCAATTTTCATTGATGATACAGGA                 | 35 |
| AGGGGACTCCCGCCACCCTCAGGTAATAAGTTTTA                | 35 |
| AACCGTGTCTAATCACCGCCACAGTGCCTTGAGTA                | 35 |
| TGGTGACTGGAGTTTTAGTACCGTATAAACAGTT                 | 35 |
| CCGTAATGACAGTGTATCACCTGCCTATTTCCG                  | 35 |
| TGGGAACGTAAGCAATAAGTATATTCTGAACATG                 | 35 |
| AGCGAGTAACAACCACGAATAAGTCCGTAAGAGG                 | 35 |
| GCCAGCTTTCATCAACATTAATGTG                          | 26 |
| GGGACATTCTGGCCAACAGAGATAGAACCC                     | 30 |
| CATCAAAAATAATCGCGTCTGGCCTCCTGTGA                   | 33 |
| TACTTCTGAATAATGGAAGGGTTAGAACCT                     | 30 |
| GGTGGCATCAATCGGAACGCAAGACTGTCACCCTCAGCAG           | 42 |
| TTTTCATTTGGGGCGGAGCTGAAAA                          | 26 |
| GCGTAGAAAAATTATGCGTTATACAAATGTTGCTAATACGTGCGTCTGA  | 49 |
| GTCAGATGTTAATAGTATAAAGCCAACCTGAAGCCTTTGAATACCTACA  | 49 |
| AGTACCTAACTTTTAGTAGGGCTTAATTCTCCCGAAATGCGCAGGAAAA  | 49 |
| AACAATAGCAAGACGCCATATTAACAACCGCAGAAAAATATTACCG     | 49 |
| TTGCTTTAATGCTGATGTAATTTAGGCAGGCTTATCCGAACGGCTGGTA  | 49 |
| AAAATCGTGGTTATTTGAGCCAGTAAGCAAGCAGATAAAAAAGAACTC   | 49 |
| ATTCATTTTTTAAATATAAAGTACCGAGAATCATTACAGTATAACATCA  | 49 |
| AAAAGAATCATAGGTAAGTAATTTCTGTCGGTTTTACAGTGCAATACTT  | 49 |
| CATCAAGTCAATAGACGACAATAACAACACTCATGCAGCAACGCAAA    | 49 |
| TACATTTAGATTAAGCTAATGCAGAACCGGTATGCATCACGAGTAAA    | 49 |
| AATTACCTTGAAAAATTATCAACAATAGCTTTCTCTAATATCATTATAA  | 49 |
| CAGTACAATTAATCTGAACAAGAAAAAACAATATCTGGTGCCAGAA     | 49 |
| TGAGTGAATAACATGAATTGAGGAAGTCAATCATACGAGCAGTAAGC    | 49 |
| AAGCCCGGATTGCATAGGCTGGCTGACTTGAAAGGCTGATAGCGAAAAG  | 49 |
| TCGCGTTATTATAAAGAGTAATCTTGAAGGGAACAGGGTAGTCTTCGC   | 49 |
| AAAGCGAAAAATCAGCGGATATTACATACAGGCGCATCAAGAAGGGC    | 49 |
| AAACTCCACGAGAAAACGTAAACAAGCTCCATGTTTTGCCTGTTACAGGC | 49 |
| AGAGAGTATGCTTTCAGTGAATAAGGCTTGTGCAAAACAAGAGCAGGCAA | 49 |

|                                                    |    |
|----------------------------------------------------|----|
| CTTTTGATATTCATACGAGAAACACCAGGTATCATAATCGTAACCGCTT  | 49 |
| TGCGGATATACTGCAGTAAATTGGGCTTAACAAAGATCATATCACTCCA  | 49 |
| TTGCTGAGTTAGATTTAATTTCAACTTCAGCGATAATCAGAGTATCGG   | 49 |
| CTCAACACAGAGGGTGTGAATTACCTTAAAAACACAGGAAGACAGTTTG  | 49 |
| AACTAAACTTTTGCTTAAGAACTGGCTCAAAGAGGATTTAAAGCATCGT  | 49 |
| AGTTTCAAAAAACCCAGTCAGGACGTTGCGAAGGCATTTTGTGCACGT   | 49 |
| TGATTCOCCTCGTTAAATCTACGTTAATGTAAAATAATTTTGGATTGA   | 49 |
| AGTAGATTAGAGCACTAACGGAACAACGAGGAAGTTTTTATTCTCCG    | 49 |
| AGATACAAAAAGACAGGTAGAAAGATT                        | 28 |
| TTTCGCAATGGTCAATAACCTGTTTAGCTATA                   | 33 |
| CGACCGTGTGATAAATAAGGCGTTAAATAAGAA                  | 33 |
| CTGACCTTTTTCAGATCAATATAATCCTCGTAAGATTTTGAATCCCAA   | 49 |
| TATTTTAGAATATAATTATCAGATGATGCAATATTTAAATCGATTTT    | 49 |
| GCGAGAATTTACATGGAATTATCATATAGTCTTTCTTGCGGAATGAAA   | 49 |
| TCCAATCACGGATTAAGAAACACCAGTAGCCCTGCGTTTTAGAGAGA    | 49 |
| ATATGTAGAATACCAACATTATCATTAAAAATACCGGTATGGGAAGC    | 49 |
| CTTAGGTCGCAGAGATAATTTAAAAAGAGCAGAAAATCAGAAATTAAC   | 49 |
| GACTACCTCAATTATAAATCCTTTGCCCGAGGCGGTACCGCAAAAGTCA  | 49 |
| ATCAAAAGATGATGAAACAATTCGACAAGCCTGCATATTTTCGCTAATA  | 49 |
| AGAAGAGAAAAAATTTAGAAATTTAGAGAGCCACGAGAACCACAAGA    | 49 |
| ATAGCTTAACAATTAATAGATAATACATATCTAAATAAACCAATAATA   | 49 |
| AGAATCCTTTTTTAACTAATAGATTAGAACCTCATATCATTGAAATA    | 49 |
| GCTATTATAAATCAAATATCTTTAGGAGAATCAATCAATAATACCGAAG  | 49 |
| TTCTGTACCATCCTAACAGACCAGGCGCATCAAAAAGCTTGC         | 42 |
| GCAAAGCAAAGACTATCACCATCAATATGATATAGTAAGAGG         | 42 |
| CCCTGACTTAATTCAGAAAGGCCGAGAGCCGAGCGAACTGGCGGAGT    | 49 |
| AAATCAAACCAGACAGGTAAGATTCAATGAGAGAGACGGTCACAACCTA  | 49 |
| TCAGAAAAACAGGTTGCAATGCCTGAGTCAGGTCAACTTAGCAATAATT  | 49 |
| CCCTCAAACCTTTAAGAACCCCTCATATAGGAGCAAATCCGCGATCTCCA | 49 |
| TCATAAATAAGAGGAACGCAAGGATAAAGAACGGTCGCCTGAAAAGGAG  | 49 |
| GCGTCCAGGCTTAGTGCGGGAGAAGCCTCATGTATACAACGGGTTTAT   | 49 |
| GTAAAATATAATATTATGACCCTGTAGGTTGATATACCAGGTGAAT     | 49 |
| GTTTTGCTGTTTTATAAATCGGTTGTACCAAAAACTCATCTTGATACCG  | 49 |
| CGAGAGGGTACGGTTAAAGCCTCAGAGCAGCAAATCAAAGAAATGACA   | 49 |
| CGACGATTTCCATAAGAATTAGCAAATCGTTAATCAACCCGCATAA     | 49 |
| TCATAACCAATCTTAAATCATAAGGCGCATTAAACGTAATCGCTGAG    | 49 |
| GGCATAGTTAGTTTAGTAGTAGCATTACAGCTCAITTCATAAAGGCC    | 49 |
| CACATTCAACTAATGCAGATACATAACGCC                     | 30 |
| TAAACCCGGAATCATAATTACTAGA                          | 26 |
| AAAAGCCTGTTTAGACAATTTTCTGACATTGGCAGATTAC           | 42 |
| TATCATAATGGTTTGAATACGAAATAATGGATTA                 | 35 |
| CATCAGTTGAGATTTAGGAATAC                            | 23 |

|                                            |    |
|--------------------------------------------|----|
| TATCCTGAATCTTACCAACGCTAACGAGCGTCT          | 33 |
| GTAGCAACGGCTACAGAGGCTTTGAGGACT             | 30 |
| TTCCAGAGCCTAATTGCCAGTTACAAAATAACAGCCAT     | 40 |
| TCCAAATGAGGGAGTAAATCGAACGTGGACTCCAA        | 35 |
| TGTTTTAAAGGGCGGCCCGAACAAAGAGTCCACT         | 35 |
| ATAGCAGGTTTACCGGGAAATTGAGTGTGTCC           | 35 |
| ATAACATAATCAATCGAGAAAAAGAATAGCCCGA         | 35 |
| GCATTAGGGAATAACGAAAGGGGCAAAATCCCTTA        | 35 |
| TGAACACAAAGAACGCTGGCTTTGATGGTGGTTC         | 35 |
| GAGGGTAACATAAACGCTGCGCCCCAGCAGGCGAA        | 35 |
| TCAGAGATAGCAAACCGCCGCAAGCGGTCCACGC         | 35 |
| ATTGAGTACTCCTTTACAGGGCTGGCCCTGAGAGA        | 35 |
| AGAGCAAAAAAGAAGCTTTGACAGCTGATTGCCCT        | 35 |
| GCAATAGCGCAATAGTGCTTTTTCCACAGTGAGA         | 35 |
| CCCTTTACCAGAAGAGCGGGGGCGCCAGGGTGG          | 35 |
| AGTGGGATTTGCTATGAACGGTGTATTACAGTTGGATTTA   | 42 |
| TTTCAACAGACGTTGTTGGGTTAATGAATCGGCCA        | 35 |
| GAGAATACTAAAGTCCCAGTCAACCTGTCGTGCCA        | 35 |
| AAGGAATCCTCATAACGACGGCTGCCCGCTTTCCA        | 35 |
| TTTTACCTGTAGCCTCAGGAACATAATTGCGTT          | 35 |
| AAAAAACACCAGTTGTTCTTGCCTAATGAGTGAG         | 35 |
| CCTTTAATACCGTAATTCATGATAAAGTGTAAGC         | 35 |
| CAGCTTGCAAGCCGCTCCTTACACAACATACGAGC        | 35 |
| TTCTTAACCCCTCACCTTATTGTTATCCGCTCAC         | 35 |
| ATAGTTGAACCGCCAAAATAATAGCTTTCTCTGT         | 35 |
| ACAACCACCTCAGATATTACTCGAATTCGTAATC         | 35 |
| CCGATATCAGGAGGACTCTAGAGGATCCCCGGGT         | 35 |
| GCTTGCAAGATAGGCGGCCCTTGTACCTCGAT           | 35 |
| GCTTTGGGTTGATACTCGTCCAGGGCTTAAGCTA         | 35 |
| CGAAAGACAGCATCGGAACGAGG                    | 23 |
| GACGGAATATTATTAAAGGTGAATTATCACCGTCACC      | 40 |
| AGCGGGGTTTGTCTAGTACCAGGCGGATA              | 30 |
| GACTTGAGCCATTTGGGAATTAGAGCCAGCAAAATCACCA   | 40 |
| GTAGCACAATATTATTATTTCCAGCT                 | 28 |
| AGGCCGACCGATTAAAGAAACAAGATTATCTACCTCATCTT  | 42 |
| AAACCATAAGACAACGTCAAAGAGGTTTGCTCAACTCAAATA | 42 |
| TAATCAGTCATATGCTTTACAGCGAACGAGAATCAAGAAC   | 42 |
| AGTTTGCTTGTACAAAAACATCTAAGACGCCAACATGCAAA  | 42 |
| TGTAGCGACACCACACGGGAGTATAGAAGAGGCATTATAACT | 42 |
| TTTTCGGACATACCTGAACCCCAATAAAGAGACCTCCGG    | 42 |
| TTAGCGTAATACATATTGAGCATCGTAGCAAAAGGCTGAGA  | 42 |
| TAATCAAAGTATGTGATAACCAAGCAAGCCAGACGTGAATTT | 42 |

|                                             |    |
|---------------------------------------------|----|
| GAGCCACGATTAAGTAAGCCCAGTACCGCATGTTGACGCTG   | 42 |
| CCCTCAGAATACCCGAAACAACCAAGAAGCGCCTGCATAGCG  | 42 |
| GAACCGCAGGAAACTATCTTCGGCTGTATAAGTCTTCCCTT   | 42 |
| CCACCCTCAAAGTTAAGAAAATGTAGATAATCAATCGTC     | 42 |
| GAACCACGAATTTCTGTAATCCGATTAGGGAGAGGCGGTTT   | 42 |
| CCAGCATTCTTCCAGTTTCAACCAACTCTTCATCGTCAGAA   | 42 |
| GGCAGGTTAACGATGAAAGGAAATCATAAAGAACGCTTTTA   | 42 |
| TGATATTAGACAGCTGCGAATCGGAACGCCAAATCTGACCAT  | 42 |
| TCCTCATAACAACGCGTTGAAAACCTGCTGCTCATAAACAGT  | 42 |
| AAAGCGGTTTCGTGGCTCCATAAATTGTGCCCTGGAATCC    | 42 |
| CCGTTCCACCCATGTTGTATCGAGATTTAACGAGTGGAAATCG | 42 |
| ATGGCTTGGGATAGCTTTCGAAGCGCGAGAGATGGCTGGATA  | 42 |
| GTGTACTGAGCCACACAGCTTTGACCCCTAATCATGGTAATA  | 42 |
| ACGGGGTCCCTCAGCGCCGACATACACTTGCATTAAAGAA    | 42 |
| ACAGTGCCCGCCACTCGCCATAAACGATTATACAAAATAG    | 42 |
| AATGCCCCCGTACTATTGCGTGCCACTAGGAAGAATACCAGA  | 42 |
| AACCTATTAGCCCGGGGAGTTAAACGGAAAACGAAACACTA   | 42 |
| AAAGTATTGAGAGCGGGATCTTTCATATTATTAATTACGA    | 42 |
| CTGAGACTCCTCAAGAGAAGGATTAGGATT              | 30 |
|                                             |    |
| object-label:                               |    |
| Cy5-TTACCATATCAAATTTATTTGCACGTAACA          |    |

**Supplementary Table 11:** list of sequences for the 42-helix bundle (“internal defects”-variants)

| sequence                                  | length | defect variant |
|-------------------------------------------|--------|----------------|
| TTATTAGTAGTAAAAAGATTA                     | 21     | 1              |
| GCATTTTGTTAATAGCAAAG                      | 21     | 2              |
| GACTGTATTGTGAAACCCTGA                     | 21     | 3              |
| TCAAGTTTTTAAGATAATCA                      | 21     | 4              |
| GTCAAAAATGAAAACCTAATTCTGTAATGGATTGA       | 35     | 5              |
| GAGAGAAACAAGAAAGCCTTT                     | 21     | 6              |
| GGAAGCGTCAACAAATAAAAA                     | 21     | 7              |
| ATTAAC TAATGCAGATATATT                    | 21     | 8              |
| AAGTCAGCAATAAATGAGTAATGTGTAGGTAAAACGTCCAG | 42     | 9              |
| GATGATGAAACGGCACTTTTG                     | 21     | 10             |
| AAAAACAACGTCGGAATTTCAA                    | 21     | 11             |
| AACAATTAATGTGTTTTTAG                      | 21     | 12             |
| TTTTTTATAGCCAGTTAAATG                     | 21     | 13             |
| GGAAGGTTAAATCAAATTCGCGTCTGGC              | 28     | 14             |

**Supplementary Table 12:** list of omitted oligonucleotides for the 42-helix bundle structure - “internal-defects”-variant

| sequence:                                         | # bases | #As | #Ts | #Cs | #Gs |  | relative AT | relative GC |
|---------------------------------------------------|---------|-----|-----|-----|-----|--|-------------|-------------|
| AGTATGTGAAACAAACCAGTAAATATATTTTAGTTAGATTAGTCTAAAG | 49      | 21  | 16  | 4   | 8   |  | 0.755       | 0.245       |
| AAGACAAAAAACAAGGTAATTTATCAAATCATCATTTTAGCCCTA     | 49      | 25  | 12  | 8   | 4   |  | 0.755       | 0.245       |
| TGAGTAAATCAGCTATTTTAAATCAGGTCTTTAAGGAATTATCGTCA   | 49      | 17  | 18  | 6   | 8   |  | 0.714       | 0.286       |
| TATTAAGGTGCCTTGCTGACACTAACCACTAATAATTCATTATACA    | 49      | 19  | 16  | 9   | 5   |  | 0.714       | 0.286       |
| AAATATTCGTCAAATTCAGCTAGCGATAGCTTAGATCATCATAATTTT  | 49      | 18  | 17  | 8   | 6   |  | 0.714       | 0.286       |
| ATGAAACAGCTACACCAAGAATAACAATTCATTATAAAGAATCGTCT   | 49      | 22  | 13  | 9   | 5   |  | 0.714       | 0.286       |
| TACATGGAACACACACTGCGATTTAAGAATTTAATTCAAGGAT       | 49      | 19  | 16  | 7   | 7   |  | 0.714       | 0.286       |
| ACGTCAAAATCAAACCCCTCATATCTAAAATATCTTTAATGGCCTGTT  | 49      | 18  | 16  | 11  | 4   |  | 0.694       | 0.306       |
| CCGTAATATTAGTTAGTACCGGAAACAAAATTAATCAGGTTATACCTA  | 49      | 20  | 14  | 8   | 7   |  | 0.694       | 0.306       |
| TGCGTATTTCTCGAGAGATAGATTGTTGGATTATGTAATACAAGAA    | 49      | 16  | 17  | 5   | 11  |  | 0.673       | 0.327       |
| TCATATGACGGGAGAGAATATGAGAGACTACCTTTTAAAGAAAATAC   | 49      | 21  | 12  | 6   | 10  |  | 0.673       | 0.327       |
| ATTAAGAAGAAACCTGTTTACCTTAGAATCCTGGATGATGGTAAGAA   | 49      | 19  | 14  | 6   | 10  |  | 0.673       | 0.327       |
| GAATTAGAGTTACAATCCATAATAACCTTGCCTTACTTCTACATTCT   | 49      | 15  | 18  | 12  | 4   |  | 0.673       | 0.327       |
| CCAGTAGCTTCCAATGTAGAATAAATCAATATTTAGAACACAGGAC    | 49      | 20  | 13  | 10  | 6   |  | 0.673       | 0.327       |
| TCAAGTTGTTTTGAAAGCAAGAGATGATGAAACAATATACAGACAGGAA | 49      | 22  | 11  | 5   | 11  |  | 0.673       | 0.327       |

**Supplementary Table 13:** list of oligonucleotides (49-bases length) of the 8-helix bundle structure with highest relative AT-content

| sequence:                                         | # bases | #As | #Ts | #Cs | #Gs |  | relative AT | relative GC |
|---------------------------------------------------|---------|-----|-----|-----|-----|--|-------------|-------------|
| CGGAACCGCCACCCACCTGCTGCTCATTAGTGAACGGTGTCTTAGCAA  | 49      | 11  | 10  | 17  | 11  |  | 0.429       | 0.571       |
| CCAGAACGAAAGGACAGCGAATACATAACGCCAAACCCTGACCCGGAGA | 49      | 20  | 3   | 15  | 11  |  | 0.469       | 0.531       |
| TTGTACCCTGAACCATTTCCCGCTTAGGTTGGTTGCCCGCAGAAG     | 49      | 8   | 15  | 14  | 12  |  | 0.469       | 0.531       |
| ATACCGAAACGGCGAAATGCAAAGCAAACCTCAACGACGTTGCGAAGGC | 49      | 19  | 5   | 13  | 12  |  | 0.490       | 0.510       |
| GCATTTAAGAACGCCAATAGCGCAGAGGCGAATGATTCGCTTGCTGG   | 49      | 13  | 11  | 11  | 14  |  | 0.490       | 0.510       |
| CCGCCAGAGTTTCACGAGGGTACCACATTCAACTAGCAAAGCGTTCTAG | 49      | 14  | 10  | 14  | 11  |  | 0.490       | 0.510       |
| ACCGATTCCCTTACACGACGAGCTGAGAAGAGTACCACCAGGTCTTTA  | 49      | 14  | 11  | 14  | 10  |  | 0.510       | 0.490       |
| AACGCGCGGAGCTAAAAAGGGGAATAATGGAAGGGGTGAGTGCCTAAT  | 49      | 17  | 8   | 6   | 18  |  | 0.510       | 0.490       |
| TCGCCCTGGATAGGTTTAGAAGATTAGAGAGTACCCTGGCTCAAAGAGG | 49      | 14  | 11  | 9   | 15  |  | 0.510       | 0.490       |
| OCTCCCTGGCTCCATATATTCCAGACGACGATAAACCTCAAGAGCAAA  | 49      | 16  | 9   | 17  | 7   |  | 0.510       | 0.490       |
| TGAATCGAGCCAGCCAAATCAGAGGAAGCCGAAAAAAGATTGAGGACT  | 49      | 20  | 6   | 10  | 13  |  | 0.531       | 0.469       |
| CAATGTCATCTGCCTTTTGCCTTTTGCAGGATGGCTCAACTTCAGCGAT | 49      | 8   | 18  | 12  | 11  |  | 0.531       | 0.469       |
| CCACCACTGCGAATTTGCGGGACGAGGCATAGTAAAAATCAAGAGAGAT | 49      | 18  | 8   | 10  | 13  |  | 0.531       | 0.469       |
| TGGAAAGAGCGTAAGCCACTAGGAAGAAAAATCTAAGACCGGATGCCTG | 49      | 19  | 7   | 9   | 14  |  | 0.531       | 0.469       |
| TTAACGGAGGAACCGCGCAGAGATGGTTAATTTAGAGCTGACCCT     | 49      | 14  | 12  | 9   | 14  |  | 0.531       | 0.469       |

**Supplementary Table 14:** list of oligonucleotides (49-bases length) of the 8-helix bundle structure with highest relative GC-content



# Supplementary Note 1: Defect probe sequence design considerations.

The problem of detecting unknown single-stranded DNA sequence motifs has two aspects: the space of target sequences that will need to be detected, and the design of a probe for sampling (ideally) the entire target sequence space.

What is the space of potential target sequences that can realistically occur in assembled objects? Our primary goal is to detect unpaired DNA defects in objects made using the scaffolded DNA origami approach. We thus analyzed the sequence of the M13mp18-derived genomic DNA that is typically used in DNA origami for the occurrence of sequence strings of given lengths. Specifically, we counted how many times each of  $4^N$  possible N-base long sequence strings are found in the scaffold DNA sequence and created histograms (i.e for N=2: how many times AA, AT, AG, AC etc pp). The resulting sequence statistics is shown in the figure S10.

One notes that the M13mp18 genomic DNA covers the complete sequence permutation space only for up to 4-base long sequence strings. Some of the 1024 possible 5-base long sequence strings already do not occur anymore (e.g ACTAG or AGAGC or CACGC). For 7-base long strings already most (more than 10,000) of the 16384 possible strings do not occur in the scaffold anymore. Therefore, the sequence space of 5- and longer sequence motifs is incomplete in the target DNA.

It appears very difficult to design a probe that can systematically sample incomplete sequence spaces for strings longer than 4 bases. Hence, we focussed on designing a probe that samples shorter sequence strings. To construct a minimal length probe sequence string we created a set of circular sequence strings that are de-Bruijn sequences of order 2, 3, and 4, respectively, for an alphabet of four letters. The strings were linearized into sets of oligonucleotides (Fig. S11). By design, it is certain that for example all of the 3-base long subsequence in the order-3 probe oligonucleotides have an exact match at least once in the scaffold sequence. In that sense, the de-Bruijn probe of order three is capable of sampling the entire scaffold DNA via 3-base motifs wherever it may be single-stranded. Sequence biases that arise through multiplicity of the search string or that are prescribed by the thermodynamic stability of different sequence motifs, such as AT vs GC rich situations, is unfortunately unavoidable.

To evaluate the degree of sequence bias arising from specific sequence binding to motifs of lengths greater than the order of the probe, we analyzed the number of exact sequence matches between de-Bruijn probe strings and the target DNA for strings with greater length. The result is shown in Supplementary Figure 12. Only the de-Bruijn probes of orders two and three have a low number of exact matches in the scaffold DNA sequence for longer sequence motifs (Fig. S12a, b). Long complementary sequence string matches as they can occur between target DNA and the probe of order 4, however, could increase undesirable specific sequence bias.

Using mfold [1], we also analyzed the de-Bruijn probes for secondary structure formation (Fig S13) and their tendency to form homo-dimers and heterodimers. All these effects could potentially compromise the utility of these DNA strands as defect probes since they compete with the desired binding to the target object. Due to the way the probe sequences are constructed, the set of sequences of the order-4 probe feature more GC-rich motifs and are thus systematically more prone to form secondary structures (Fig S13c). Regarding homo- and heterodimerization, the de-Bruijn probe of order two can form two homodimers with more than 5kcal/mol binding energy, the de-Bruijn probe of order three can form four homodimers with more than 5kcal/mol binding energy, and the de-Bruijn probe of order four can form a total of 31 different homodimeric structures with more than 5 kcal/mol binding energy. In addition, the de-Bruijn probe of order three can also form five heterodimers with at least 5 kcal/mol, and the de-Bruijn probe of order four can also form a total of 107 heterodimers with at least 5 kcal/mol.

Hence, as one might expect, the shortest probe has also the lowest propensity to react with itself, while the much longer de-Bruijn probe of order 4 that consists of six separate oligonucleotides forms many hairpins and can undergo multiple side reactions that might compromise its ability to sample all desired sequence motifs.

We tested the three de-Bruijn probes for their ability to label GC-rich versus AT-rich unpaired DNA defects in DNA origami structures. The test samples were prepared by omitting appropriately selected staple DNA strands from the assembly reactions. The expectation is that a “good” probe should faithfully label both types of defects, but give a greater signal for GC-rich defects due to the greater binding strength. Supplementary Figure 14 shows the result of these experiments.

One observation is that the absolute labeling intensity by the different de-Bruijn probes increases with the order of the probe (e.g compare Fig. S14 a vs. c vs. e). The brightest signals are provided by the de-Bruijn probe of order 4, while the weakest signals that can hardly be distinguished from background come from the probe of order 2. Most importantly, only the probes of order 2 and 3 exhibit the expected behaviour or labeling GC-rich defects more strongly than AT-rich defects (Fig. S14b and S14d). The probe of order 4, by contrast, labels AT-rich defects much more efficiently than GC-rich defects.

Together with the tendency of the de-Bruijn probe of order 4 to form many secondary structures and homo-/heterodimers we interpret this as an indication of unwanted sequence bias for probe 4. The signals provided by the probe of order 2 were too weak to be practically useful.

Hence, de-Bruijn probe of order 3 was the best choice for a defect probe and was thus analyzed in greater depth and used for our study.

## References:

[1] M. Zuker. Mfold web server for nucleic acid folding and hybridization prediction. *Nucleic Acids Res.* 31 (13), 3406-3415, 2003.
